# Supplementary material for: A general theory on frequency and time-frequency analysis of irregularly sampled time series based on projection methods. I. Frequency analysis
Source: Copernicus journal article supplement (doi:10.5194/npg-2017-26), 2017-07-04
Supplement: Supplementary file 50 [file npg-2017-26-supplement.zip]

Archive with 226 entries (199 files):
- supplementary_material/
- supplementary_material/.DS_Store
- __MACOSX/
- __MACOSX/supplementary_material/
- __MACOSX/supplementary_material/._.DS_Store
- supplementary_material/code/
- supplementary_material/code/.DS_Store
- __MACOSX/supplementary_material/code/
- __MACOSX/supplementary_material/code/._.DS_Store
- supplementary_material/code/analytical_variance_periodogram_red_noise.py
- __MACOSX/supplementary_material/code/._analytical_variance_periodogram_red_noise.py
- supplementary_material/code/approx_Lomb_generalized.py
- __MACOSX/supplementary_material/code/._approx_Lomb_generalized.py
- supplementary_material/code/CPU_elixir/
- supplementary_material/code/CPU_elixir/comparison_CPU_anal_vs_mcmc.py
- __MACOSX/supplementary_material/code/CPU_elixir/
- __MACOSX/supplementary_material/code/CPU_elixir/._comparison_CPU_anal_vs_mcmc.py
- supplementary_material/code/CPU_elixir/gen_car1.py
- __MACOSX/supplementary_material/code/CPU_elixir/._gen_car1.py
- supplementary_material/code/CPU_elixir/gen_car1.pyc
- __MACOSX/supplementary_material/code/CPU_elixir/._gen_car1.pyc
- __MACOSX/supplementary_material/code/._CPU_elixir
- supplementary_material/code/data/
- supplementary_material/code/data/ODP1148-BF-18O.txt
- __MACOSX/supplementary_material/code/data/
- __MACOSX/supplementary_material/code/data/._ODP1148-BF-18O.txt
- supplementary_material/code/data/source.txt
- __MACOSX/supplementary_material/code/data/._source.txt
- __MACOSX/supplementary_material/code/._data
- supplementary_material/code/Example_with_ODP1148.ipynb
- __MACOSX/supplementary_material/code/._Example_with_ODP1148.ipynb
- supplementary_material/code/gen_car1_wv33.py
- __MACOSX/supplementary_material/code/._gen_car1_wv33.py
- supplementary_material/code/gen_car1_wv33.pyc
- __MACOSX/supplementary_material/code/._gen_car1_wv33.pyc
- supplementary_material/code/ODP1148_sensitivity_background_noise.py
- __MACOSX/supplementary_material/code/._ODP1148_sensitivity_background_noise.py
- supplementary_material/code/periodogram_plus_mean.py
- __MACOSX/supplementary_material/code/._periodogram_plus_mean.py
- supplementary_material/code/README.txt
- __MACOSX/supplementary_material/code/._README.txt
- supplementary_material/code/tapering_window_wv33.py
- __MACOSX/supplementary_material/code/._tapering_window_wv33.py
- supplementary_material/code/tapering_window_wv33.pyc
- __MACOSX/supplementary_material/code/._tapering_window_wv33.pyc
- __MACOSX/supplementary_material/._code
- supplementary_material/figures/
- supplementary_material/figures/.DS_Store
- __MACOSX/supplementary_material/figures/
- __MACOSX/supplementary_material/figures/._.DS_Store
- supplementary_material/figures/anal_variance_rn.pdf
- __MACOSX/supplementary_material/figures/._anal_variance_rn.pdf
- supplementary_material/figures/approx_Lomb_generalized.pdf
- __MACOSX/supplementary_material/figures/._approx_Lomb_generalized.pdf
- supplementary_material/figures/CPU/
- supplementary_material/figures/CPU/CPU_rn_95_loglog.pdf
- __MACOSX/supplementary_material/figures/CPU/
- __MACOSX/supplementary_material/figures/CPU/._CPU_rn_95_loglog.pdf
- supplementary_material/figures/CPU/CPU_rn_95_normal.pdf
- __MACOSX/supplementary_material/figures/CPU/._CPU_rn_95_normal.pdf
- supplementary_material/figures/CPU/CPU_rn_95_semilogx.pdf
- __MACOSX/supplementary_material/figures/CPU/._CPU_rn_95_semilogx.pdf
- supplementary_material/figures/CPU/CPU_rn_95_semilogy.pdf
- __MACOSX/supplementary_material/figures/CPU/._CPU_rn_95_semilogy.pdf
- supplementary_material/figures/CPU/CPU_rn_99_loglog.pdf
- __MACOSX/supplementary_material/figures/CPU/._CPU_rn_99_loglog.pdf
- supplementary_material/figures/CPU/CPU_rn_99_normal.pdf
- __MACOSX/supplementary_material/figures/CPU/._CPU_rn_99_normal.pdf
- supplementary_material/figures/CPU/CPU_rn_99_semilogx.pdf
- __MACOSX/supplementary_material/figures/CPU/._CPU_rn_99_semilogx.pdf
- supplementary_material/figures/CPU/CPU_rn_99_semilogy.pdf
- __MACOSX/supplementary_material/figures/CPU/._CPU_rn_99_semilogy.pdf
- supplementary_material/figures/CPU/CPU_wn_95_loglog.pdf
- __MACOSX/supplementary_material/figures/CPU/._CPU_wn_95_loglog.pdf
- supplementary_material/figures/CPU/CPU_wn_95_normal.pdf
- __MACOSX/supplementary_material/figures/CPU/._CPU_wn_95_normal.pdf
- supplementary_material/figures/CPU/CPU_wn_95_semilogx.pdf
- __MACOSX/supplementary_material/figures/CPU/._CPU_wn_95_semilogx.pdf
- supplementary_material/figures/CPU/CPU_wn_95_semilogy.pdf
- __MACOSX/supplementary_material/figures/CPU/._CPU_wn_95_semilogy.pdf
- supplementary_material/figures/CPU/CPU_wn_99_loglog.pdf
- __MACOSX/supplementary_material/figures/CPU/._CPU_wn_99_loglog.pdf
- supplementary_material/figures/CPU/CPU_wn_99_normal.pdf
- __MACOSX/supplementary_material/figures/CPU/._CPU_wn_99_normal.pdf
- supplementary_material/figures/CPU/CPU_wn_99_semilogx.pdf
- __MACOSX/supplementary_material/figures/CPU/._CPU_wn_99_semilogx.pdf
- supplementary_material/figures/CPU/CPU_wn_99_semilogy.pdf
- __MACOSX/supplementary_material/figures/CPU/._CPU_wn_99_semilogy.pdf
- __MACOSX/supplementary_material/figures/._CPU
- supplementary_material/figures/LS_projection.key
- __MACOSX/supplementary_material/figures/._LS_projection.key
- supplementary_material/figures/LS_projection.png
- __MACOSX/supplementary_material/figures/._LS_projection.png
- supplementary_material/figures/ODP1148_example/
- supplementary_material/figures/ODP1148_example/amplitude_vs_periodogram.pdf
- __MACOSX/supplementary_material/figures/ODP1148_example/
- __MACOSX/supplementary_material/figures/ODP1148_example/._amplitude_vs_periodogram.pdf
- supplementary_material/figures/ODP1148_example/carma_analytic/
- supplementary_material/figures/ODP1148_example/carma_analytic/assess_fit1.pdf
- __MACOSX/supplementary_material/figures/ODP1148_example/carma_analytic/
- __MACOSX/supplementary_material/figures/ODP1148_example/carma_analytic/._assess_fit1.pdf
- supplementary_material/figures/ODP1148_example/carma_analytic/assess_fit2.pdf
- __MACOSX/supplementary_material/figures/ODP1148_example/carma_analytic/._assess_fit2.pdf
- supplementary_material/figures/ODP1148_example/carma_analytic/assess_fit3.pdf
- __MACOSX/supplementary_material/figures/ODP1148_example/carma_analytic/._assess_fit3.pdf
- supplementary_material/figures/ODP1148_example/carma_analytic/assess_fit4.pdf
- __MACOSX/supplementary_material/figures/ODP1148_example/carma_analytic/._assess_fit4.pdf
- supplementary_material/figures/ODP1148_example/carma_analytic/carma_spectrum.pdf
- __MACOSX/supplementary_material/figures/ODP1148_example/carma_analytic/._carma_spectrum.pdf
- supplementary_material/figures/ODP1148_example/carma_analytic/log_omega.pdf
- __MACOSX/supplementary_material/figures/ODP1148_example/carma_analytic/._log_omega.pdf
- supplementary_material/figures/ODP1148_example/carma_analytic/mu.pdf
- __MACOSX/supplementary_material/figures/ODP1148_example/carma_analytic/._mu.pdf
- supplementary_material/figures/ODP1148_example/carma_analytic/sigma.pdf
- __MACOSX/supplementary_material/figures/ODP1148_example/carma_analytic/._sigma.pdf
- supplementary_material/figures/ODP1148_example/carma_analytic/var.pdf
- __MACOSX/supplementary_material/figures/ODP1148_example/carma_analytic/._var.pdf
- __MACOSX/supplementary_material/figures/ODP1148_example/._carma_analytic
- supplementary_material/figures/ODP1148_example/check_convergence_percentiles.pdf
- __MACOSX/supplementary_material/figures/ODP1148_example/._check_convergence_percentiles.pdf
- supplementary_material/figures/ODP1148_example/comparison_trends_periodogram.pdf
- __MACOSX/supplementary_material/figures/ODP1148_example/._comparison_trends_periodogram.pdf
- supplementary_material/figures/ODP1148_example/comparison_trends_ts.pdf
- __MACOSX/supplementary_material/figures/ODP1148_example/._comparison_trends_ts.pdf
- supplementary_material/figures/ODP1148_example/data_and_trend.pdf
- __MACOSX/supplementary_material/figures/ODP1148_example/._data_and_trend.pdf
- supplementary_material/figures/ODP1148_example/number_WOSA_segments_per_frequency.pdf
- __MACOSX/supplementary_material/figures/ODP1148_example/._number_WOSA_segments_per_frequency.pdf
- supplementary_material/figures/ODP1148_example/periodogram_distr_params.pdf
- __MACOSX/supplementary_material/figures/ODP1148_example/._periodogram_distr_params.pdf
- supplementary_material/figures/ODP1148_example/periodogram_median_params.pdf
- __MACOSX/supplementary_material/figures/ODP1148_example/._periodogram_median_params.pdf
- supplementary_material/figures/ODP1148_example/sensitivity_order_carma/
- supplementary_material/figures/ODP1148_example/sensitivity_order_carma/carma20/
- supplementary_material/figures/ODP1148_example/sensitivity_order_carma/carma20/ar_coefs_1.pdf
- __MACOSX/supplementary_material/figures/ODP1148_example/sensitivity_order_carma/
- __MACOSX/supplementary_material/figures/ODP1148_example/sensitivity_order_carma/carma20/
- __MACOSX/supplementary_material/figures/ODP1148_example/sensitivity_order_carma/carma20/._ar_coefs_1.pdf
- supplementary_material/figures/ODP1148_example/sensitivity_order_carma/carma20/ar_coefs_2.pdf
- __MACOSX/supplementary_material/figures/ODP1148_example/sensitivity_order_carma/carma20/._ar_coefs_2.pdf
- supplementary_material/figures/ODP1148_example/sensitivity_order_carma/carma20/assess_fit1.pdf
- __MACOSX/supplementary_material/figures/ODP1148_example/sensitivity_order_carma/carma20/._assess_fit1.pdf
- supplementary_material/figures/ODP1148_example/sensitivity_order_carma/carma20/assess_fit2.pdf
- __MACOSX/supplementary_material/figures/ODP1148_example/sensitivity_order_carma/carma20/._assess_fit2.pdf
- supplementary_material/figures/ODP1148_example/sensitivity_order_carma/carma20/assess_fit3.pdf
- __MACOSX/supplementary_material/figures/ODP1148_example/sensitivity_order_carma/carma20/._assess_fit3.pdf
- supplementary_material/figures/ODP1148_example/sensitivity_order_carma/carma20/assess_fit4.pdf
- __MACOSX/supplementary_material/figures/ODP1148_example/sensitivity_order_carma/carma20/._assess_fit4.pdf
- supplementary_material/figures/ODP1148_example/sensitivity_order_carma/carma20/carma_spectrum.pdf
- __MACOSX/supplementary_material/figures/ODP1148_example/sensitivity_order_carma/carma20/._carma_spectrum.pdf
- supplementary_material/figures/ODP1148_example/sensitivity_order_carma/carma20/mu.pdf
- __MACOSX/supplementary_material/figures/ODP1148_example/sensitivity_order_carma/carma20/._mu.pdf
- supplementary_material/figures/ODP1148_example/sensitivity_order_carma/carma20/sigma.pdf
- __MACOSX/supplementary_material/figures/ODP1148_example/sensitivity_order_carma/carma20/._sigma.pdf
- supplementary_material/figures/ODP1148_example/sensitivity_order_carma/carma20/var.pdf
- __MACOSX/supplementary_material/figures/ODP1148_example/sensitivity_order_carma/carma20/._var.pdf
- __MACOSX/supplementary_material/figures/ODP1148_example/sensitivity_order_carma/._carma20
- supplementary_material/figures/ODP1148_example/sensitivity_order_carma/carma21/
- supplementary_material/figures/ODP1148_example/sensitivity_order_carma/carma21/ar_coefs_1.pdf
- __MACOSX/supplementary_material/figures/ODP1148_example/sensitivity_order_carma/carma21/
- __MACOSX/supplementary_material/figures/ODP1148_example/sensitivity_order_carma/carma21/._ar_coefs_1.pdf
- supplementary_material/figures/ODP1148_example/sensitivity_order_carma/carma21/ar_coefs_2.pdf
- __MACOSX/supplementary_material/figures/ODP1148_example/sensitivity_order_carma/carma21/._ar_coefs_2.pdf
- supplementary_material/figures/ODP1148_example/sensitivity_order_carma/carma21/assess_fit1.pdf
- __MACOSX/supplementary_material/figures/ODP1148_example/sensitivity_order_carma/carma21/._assess_fit1.pdf
- supplementary_material/figures/ODP1148_example/sensitivity_order_carma/carma21/assess_fit2.pdf
- __MACOSX/supplementary_material/figures/ODP1148_example/sensitivity_order_carma/carma21/._assess_fit2.pdf
- supplementary_material/figures/ODP1148_example/sensitivity_order_carma/carma21/assess_fit3.pdf
- __MACOSX/supplementary_material/figures/ODP1148_example/sensitivity_order_carma/carma21/._assess_fit3.pdf
- supplementary_material/figures/ODP1148_example/sensitivity_order_carma/carma21/assess_fit4.pdf
- __MACOSX/supplementary_material/figures/ODP1148_example/sensitivity_order_carma/carma21/._assess_fit4.pdf
- supplementary_material/figures/ODP1148_example/sensitivity_order_carma/carma21/carma_spectrum.pdf
- __MACOSX/supplementary_material/figures/ODP1148_example/sensitivity_order_carma/carma21/._carma_spectrum.pdf
- supplementary_material/figures/ODP1148_example/sensitivity_order_carma/carma21/ma_coefs_1.pdf
- __MACOSX/supplementary_material/figures/ODP1148_example/sensitivity_order_carma/carma21/._ma_coefs_1.pdf
- supplementary_material/figures/ODP1148_example/sensitivity_order_carma/carma21/mu.pdf
- __MACOSX/supplementary_material/figures/ODP1148_example/sensitivity_order_carma/carma21/._mu.pdf
- supplementary_material/figures/ODP1148_example/sensitivity_order_carma/carma21/sigma.pdf
- __MACOSX/supplementary_material/figures/ODP1148_example/sensitivity_order_carma/carma21/._sigma.pdf
- supplementary_material/figures/ODP1148_example/sensitivity_order_carma/carma21/var.pdf
- __MACOSX/supplementary_material/figures/ODP1148_example/sensitivity_order_carma/carma21/._var.pdf
- __MACOSX/supplementary_material/figures/ODP1148_example/sensitivity_order_carma/._carma21
- supplementary_material/figures/ODP1148_example/sensitivity_order_carma/peridogram.pdf
- __MACOSX/supplementary_material/figures/ODP1148_example/sensitivity_order_carma/._peridogram.pdf
- supplementary_material/figures/ODP1148_example/sensitivity_order_carma/rn/
- supplementary_material/figures/ODP1148_example/sensitivity_order_carma/rn/assess_fit1.pdf
- __MACOSX/supplementary_material/figures/ODP1148_example/sensitivity_order_carma/rn/
- __MACOSX/supplementary_material/figures/ODP1148_example/sensitivity_order_carma/rn/._assess_fit1.pdf
- supplementary_material/figures/ODP1148_example/sensitivity_order_carma/rn/assess_fit2.pdf
- __MACOSX/supplementary_material/figures/ODP1148_example/sensitivity_order_carma/rn/._assess_fit2.pdf
- supplementary_material/figures/ODP1148_example/sensitivity_order_carma/rn/assess_fit3.pdf
- __MACOSX/supplementary_material/figures/ODP1148_example/sensitivity_order_carma/rn/._assess_fit3.pdf
- supplementary_material/figures/ODP1148_example/sensitivity_order_carma/rn/assess_fit4.pdf
- __MACOSX/supplementary_material/figures/ODP1148_example/sensitivity_order_carma/rn/._assess_fit4.pdf
- supplementary_material/figures/ODP1148_example/sensitivity_order_carma/rn/carma_spectrum.pdf
- __MACOSX/supplementary_material/figures/ODP1148_example/sensitivity_order_carma/rn/._carma_spectrum.pdf
- supplementary_material/figures/ODP1148_example/sensitivity_order_carma/rn/log_omega.pdf
- __MACOSX/supplementary_material/figures/ODP1148_example/sensitivity_order_carma/rn/._log_omega.pdf
- supplementary_material/figures/ODP1148_example/sensitivity_order_carma/rn/mu.pdf
- __MACOSX/supplementary_material/figures/ODP1148_example/sensitivity_order_carma/rn/._mu.pdf
- supplementary_material/figures/ODP1148_example/sensitivity_order_carma/rn/sigma.pdf
- __MACOSX/supplementary_material/figures/ODP1148_example/sensitivity_order_carma/rn/._sigma.pdf
- supplementary_material/figures/ODP1148_example/sensitivity_order_carma/rn/var.pdf
- __MACOSX/supplementary_material/figures/ODP1148_example/sensitivity_order_carma/rn/._var.pdf
- __MACOSX/supplementary_material/figures/ODP1148_example/sensitivity_order_carma/._rn
- supplementary_material/figures/ODP1148_example/sensitivity_order_carma/wn/
- supplementary_material/figures/ODP1148_example/sensitivity_order_carma/wn/assess_fit2.pdf
- __MACOSX/supplementary_material/figures/ODP1148_example/sensitivity_order_carma/wn/
- __MACOSX/supplementary_material/figures/ODP1148_example/sensitivity_order_carma/wn/._assess_fit2.pdf
- supplementary_material/figures/ODP1148_example/sensitivity_order_carma/wn/assess_fit3.pdf
- __MACOSX/supplementary_material/figures/ODP1148_example/sensitivity_order_carma/wn/._assess_fit3.pdf
- supplementary_material/figures/ODP1148_example/sensitivity_order_carma/wn/assess_fit4.pdf
- __MACOSX/supplementary_material/figures/ODP1148_example/sensitivity_order_carma/wn/._assess_fit4.pdf
- supplementary_material/figures/ODP1148_example/sensitivity_order_carma/wn/sigma.pdf
- __MACOSX/supplementary_material/figures/ODP1148_example/sensitivity_order_carma/wn/._sigma.pdf
- __MACOSX/supplementary_material/figures/ODP1148_example/sensitivity_order_carma/._wn
- __MACOSX/supplementary_material/figures/ODP1148_example/._sensitivity_order_carma
- supplementary_material/figures/ODP1148_example/timestep.pdf
- __MACOSX/supplementary_material/figures/ODP1148_example/._timestep.pdf
- supplementary_material/figures/ODP1148_example/WOSA_segmentation.pdf
- __MACOSX/supplementary_material/figures/ODP1148_example/._WOSA_segmentation.pdf
- __MACOSX/supplementary_material/figures/._ODP1148_example
- supplementary_material/figures/periodogram_and_mean.pdf
- __MACOSX/supplementary_material/figures/._periodogram_and_mean.pdf
- __MACOSX/supplementary_material/._figures
- __MACOSX/._supplementary_material
