# Supplementary material for: A general theory on frequency and time-frequency analysis of irregularly sampled time series based on projection methods. I. Frequency analysis
Source: Copernicus journal article supplement (doi:10.5194/npg-2017-26), 2017-07-04
Supplement: Supplementary file 50 [file npg-2017-26-supplement.zip › supplementary_material/code/data/ODP1148-BF-18O.txt]

                         6                     2.358
                        10                     2.841
                        14                     4.028
                        19                     4.086
                        22                      4.17
                        28                     3.762
                        38                     3.655
                        42                     3.544
                        43                     3.795
                        47                     3.559
                        49                      3.52
                        52                     3.646
                        53                      3.52
                        55                     3.514
                        56                     3.599
                        58                     3.519
                        61                     3.684
                        65                     3.659
                        80                     3.013
                        87                     3.244
                        92                     3.185
                        99                     3.102
                       106                     3.235
                       122                     2.768
                       128                     3.241
                       132                     3.779
                       135                     3.932
                       139                      3.79
                       171                     3.707
                       177                      3.76
                       183                     3.876
                       189                     3.515
                       194                      3.34
                       245                     3.506
                       249                     3.617
                       303                     3.285
                       319                     3.056
                       331                     2.946
                       341                     3.494
                       362                     2.978
                       405                     2.546
                       414                     3.035
                       434                     3.788
                       444                     3.677
                       456                     3.568
                       467                     3.561
                       480                     3.629
                       502                     3.037
                       524                     3.355
                       538                     3.788
                       541                     3.485
                       563                     3.834
                       565                     3.488
                       577                     3.097
                       587                     3.123
                       598                     3.168
                       617                     2.715
                       618                      2.83
                       620                     3.719
                       638                     4.306
                       649                     3.843
                       659                     4.155
                       673                      3.54
                       690                      3.34
                       704                     3.281
                       709                     3.119
                       715                     3.345
                       722                     2.905
                       731                     3.392
                       741                     3.236
                       748                     3.634
                       750                     3.599
                       758                     3.024
                       760                     3.449
                       767                     3.678
                       798                     3.655
                       802                      3.48
                       837                     2.996
                       872                     3.805
                       875                     3.601
                       877                     3.966
                       884                     3.393
                       888                     3.543
                       894                     3.564
                       905                      3.19
                       910                     3.226
                       918                     3.677
                       936                     2.595
                       948                      2.51
                       965                         3
                       974                     2.754
                       983                     2.967
                       997                     2.917
                      1008                     3.405
                      1026                     3.008
                      1040                     3.598
                      1053                     3.205
                      1070                     2.622
                      1081                      3.26
                      1087                     3.289
                      1101                     3.307
                      1115                      3.55
                      1119                     3.474
                      1126                     3.486
                      1127                     3.197
                      1177                     2.946
                      1199                     3.262
                      1207                     3.668
                      1215                     3.499
                      1242                     2.822
                      1249                     3.359
                      1268                     3.296
                      1276                     2.845
                      1279                     2.877
                      1286                     3.715
                      1304                     3.389
                      1316                     3.058
                      1322                     3.215
                      1331                     3.464
                      1334                     3.546
                      1347                     2.948
                      1351                     2.809
                      1376                     3.293
                      1404                     2.881
                      1422                     3.238
                      1440                      2.79
                      1445                     2.694
                      1460                     3.389
                      1484                     2.518
                      1509                     3.545
                      1516                     3.237
                      1517                     3.311
                      1524                     3.361
                      1525                     3.208
                      1537                      3.49
                      1554                     2.892
                      1569                     3.214
                      1572                     3.563
                      1589                      3.15
                      1611                     2.689
                      1613                     2.542
                      1625                     2.898
                      1629                     2.941
                      1641                     2.959
                      1660                     3.557
                      1682                     3.126
                      1702                     3.488
                      1720                     2.767
                      1722                     2.797
                      1746                      2.84
                      1748                      3.04
                      1757                     3.294
                      1765                     2.719
                      1777                     2.924
                      1795                     3.364
                      1810                     3.053
                      1815                     2.593
                      1832                     2.879
                      1841                     3.403
                      1855                     2.903
                      1868                     2.979
                      1890                     2.708
                      1916                     3.339
                      1924                     2.971
                      1939                     2.499
                      1957                     3.146
                      1982                      2.57
                      1999                     3.181
                      2027                     2.707
                      2051                     2.974
                      2072                     3.315
                      2086                     3.381
                      2090                     3.167
                      2103                      3.04
                      2104                     2.966
                      2136                     2.895
                      2140                     2.664
                      2144                     2.774
                      2146                     2.931
                      2152                     3.461
                      2162                     3.629
                      2163                     3.493
                      2164                     3.284
                      2165                     3.102
                      2166                     3.421
                      2167                     3.468
                      2173                     3.106
                      2175                     3.258
                      2181                     2.981
                      2182                     3.063
                      2185                      3.05
                      2186                     2.981
                      2189                     2.798
                      2190                     2.796
                      2193                     2.846
                      2194                     2.692
                      2195                     2.732
                      2197                      2.82
                      2198                       2.9
                      2200                     3.059
                      2202                     3.074
                      2204                     3.132
                      2205                     2.987
                      2206                     3.011
                      2207                     2.905
                      2211                     2.675
                      2216                     2.899
                      2222                     2.836
                      2227                     2.695
                      2232                     2.854
                      2237                     2.852
                      2240                     3.144
                      2241                     3.183
                      2242                     3.265
                      2246                     3.038
                      2256                     2.704
                      2262                     2.364
                      2275                     2.847
                      2283                     3.149
                      2294                     2.767
                      2299                      2.69
                      2305                     2.727
                      2310                     2.755
                      2311                     2.923
                      2313                     3.052
                      2316                     3.063
                      2318                     2.971
                      2319                     3.018
                      2320                     3.064
                      2321                     3.048
                      2322                     2.831
                      2330                     2.676
                      2331                     2.836
                      2339                     2.701
                      2348                     2.469
                      2351                     3.155
                      2354                     3.091
                      2357                     2.986
                      2361                     3.109
                      2364                     3.178
                      2368                     3.061
                      2373                     3.262
                      2377                      3.35
                      2381                     3.068
                      2393                     2.835
                      2400                     3.033
                      2412                     3.156
                      2416                      2.99
                      2420                     2.948
                      2421                     2.784
                      2422                     2.883
                      2423                      2.55
                      2427                     2.558
                      2429                     2.807
                      2432                     2.838
                      2434                     2.792
                      2438                     2.821
                      2440                     2.914
                      2442                     3.235
                      2444                      3.46
                      2447                      3.55
                      2453                      3.36
                      2456                     3.428
                      2459                     3.237
                      2465                     3.059
                      2467                     2.772
                      2469                     2.526
                      2472                     2.655
                      2474                     2.489
                      2477                     2.829
                      2482                     3.161
                      2488                     3.521
                      2492                     3.084
                      2495                     3.109
                      2499                     3.091
                      2501                      2.64
                      2503                     2.907
                      2508                     2.486
                      2523                     3.504
                      2526                     3.359
                      2529                     3.464
                      2531                     3.445
                      2534                     3.029
                      2537                     3.218
                      2544                     2.546
                      2552                      3.07
                      2555                     2.867
                      2557                     2.874
                      2567                     2.873
                      2577                     2.647
                      2593                     2.656
                      2597                      3.05
                      2601                     3.038
                      2605                     3.112
                      2641                     3.015
                      2649                     2.967
                      2656                     3.001
                      2658                     2.647
                      2661                     2.643
                      2664                     2.598
                      2667                     2.454
                      2681                     3.016
                      2694                     3.059
                      2699                     2.905
                      2704                     2.883
                      2718                       3.1
                      2721                      3.24
                      2725                     3.178
                      2728                      3.13
                      2732                     3.223
                      2734                     2.979
                      2739                     3.249
                      2741                     2.946
                      2751                     2.615
                      2752                     3.058
                      2756                     2.774
                      2760                     2.757
                      2763                     2.627
                      2764                     2.483
                      2767                       2.8
                      2771                      2.58
                      2772                     2.679
                      2775                     2.563
                      2776                     2.798
                      2779                     2.692
                      2781                     2.643
                      2784                     2.548
                      2786                     2.771
                      2789                     2.391
                      2798                      2.99
                      2808                     3.068
                      2816                     3.053
                      2821                     2.956
                      2831                     2.755
                      2835                      2.56
                      2840                     2.527
                      2849                     2.753
                      2859                      2.86
                      2864                     2.812
                      2869                     2.632
                      2873                     2.574
                      2877                     2.598
                      2889                     2.954
                      2894                      2.79
                      2899                     2.735
                      2909                     2.471
                      2911                     2.654
                      2915                     2.703
                      2924                      2.44
                      2928                     2.571
                      2931                     2.742
                      2935                     3.231
                      2939                     2.614
                      2944                     2.496
                      2948                     2.471
                      2977                     2.925
                      2982                     2.904
                      2987                     2.772
                      3014                     3.176
                      3024                     2.642
                      3036                     2.516
                      3058                     2.825
                      3069                     2.472
                      3075                     2.291
                      3081                     2.347
                      3086                     2.605
                      3091                     2.438
                      3098                     2.586
                      3112                     2.406
                      3120                      2.39
                      3130                     2.675
                      3141                     2.999
                      3145                     2.748
                      3154                      2.33
                      3158                     2.338
                      3162                     2.187
                      3165                     2.438
                      3168                      2.53
                      3180                     2.463
                      3193                     2.444
                      3205                     2.317
                      3218                      2.45
                      3229                     2.334
                      3243                     2.371
                      3255                     2.429
                      3266                     2.598
                      3280                     2.727
                      3293                     2.991
                      3305                     3.047
                      3313                     2.277
                      3330                     2.561
                      3339                     2.704
                      3349                     2.657
                      3358                     2.385
                      3367                     2.615
                      3378                     2.611
                      3388                     2.445
                      3397                     2.319
                      3417                     2.332
                      3426                     2.414
                      3436                      2.73
                      3453                     2.239
                      3469                     2.314
                      3502                     2.349
                      3519                     2.199
                      3552                     2.389
                      3568                     2.199
                      3585                     2.458
                      3601                      2.32
                      3618                     2.072
                      3634                     2.593
                      3644                     2.218
                      3654                     2.465
                      3674                     2.261
                      3683                     2.149
                      3694                     2.388
                      3714                     2.335
                      3734                     2.149
                      3744                     2.299
                      3754                     2.316
                      3774                     2.251
                      3783                     2.176
                      3794                     2.413
                      3811                     2.284
                      3827                     2.186
                      3844                     2.156
                      3861                     2.181
                      3877                     2.219
                      3894                      2.06
                      3911                     2.075
                      3927                     2.188
                      3961                     2.024
                      3977                     2.313
                      3994                     2.543
                      4008                     2.233
                      4022                     2.318
                      4035                       2.3
                      4049                     1.804
                      4063                     2.283
                      4077                     2.327
                      4089                     2.206
                      4118                     2.084
                      4132                     1.829
                      4146                     2.183
                      4159                     2.302
                      4173                      2.42
                      4187                      2.36
                      4201                     2.215
                      4215                     2.211
                      4227                     2.043
                      4242                     2.359
                      4256                     2.366
                      4270                     2.065
                      4284                     1.618
                      4303                     2.278
                      4330                       2.2
                      4435                     2.155
                      4449                     2.155
                      4463                     2.151
                      4477                      1.82
                      4490                     1.977
                      4504                     2.145
                      4518                     2.167
                      4532                     2.115
                      4545                     2.333
                      4557                     2.241
                      4573                     2.164
                      4601                     2.099
                      4614                     2.061
                      4628                     2.133
                      4642                     1.912
                      4656                     2.218
                      4670                      2.13
                      4683                     1.995
                      4695                     2.132
                      4711                      2.15
                      4725                     2.127
                      4738                     2.188
                      4766                     2.206
                      4780                     2.152
                      4794                     2.217
                      4807                     2.116
                      4821                     2.041
                      4833                     2.102
                      4849                     2.293
                      4863                     2.139
                      4876                     2.607
                      4885                      1.93
                      4893                     2.446
                      4902                      2.01
                      4910                      2.23
                      4919                     2.169
                      4927                     1.905
                      4936                     2.487
                      4944                     2.352
                      4953                     2.234
                      4962                     2.076
                      4970                     2.115
                      4979                     2.055
                      4987                     2.009
                      4996                     2.113
                      5004                     2.193
                      5013                     2.294
                      5020                     2.071
                      5030                     2.075
                      5047                     1.993
                      5056                     2.319
                      5064                     2.271
                      5073                     2.023
                      5090                     1.988
                      5095                     2.099
                      5098                     2.174
                      5106                     2.304
                      5115                      2.37
                      5124                     2.191
                      5133                      2.13
                      5147                     1.846
                      5149                     2.249
                      5158                     2.234
                      5167                     2.151
                      5175                      2.09
                      5184                     2.299
                      5192                     2.264
                      5201                     2.391
                      5210                     2.216
                      5218                     2.073
                      5225                     2.185
                      5235                     2.072
                      5244                     1.952
                      5252                     2.271
                      5261                     2.332
                      5269                     1.979
                      5278                     2.046
                      5286                     1.952
                      5295                     2.164
                      5304                     2.041
                      5311                     1.953
                      5321                     2.016
                      5324                     2.287
                      5338                     2.103
                      5346                     1.841
                      5355                     2.521
                      5365                     2.074
                      5375                     1.984
                      5386                     2.162
                      5396                      2.18
                      5405                     2.108
                      5416                     2.075
                      5427                     1.999
                      5437                     2.009
                      5447                     2.196
                      5457                      2.14
                      5468                     2.192
                      5478                     2.173
                      5488                     2.196
                      5498                         2
                      5507                     2.234
                      5519                     2.129
                      5529                     2.022
                      5539                     2.028
                      5550                     2.172
                      5560                     1.926
                      5570                     2.022
                      5580                     2.038
                      5590                     1.896
                      5601                     2.039
                      5610                     2.275
                      5621                     2.023
                      5631                     1.811
                      5642                     2.072
                      5652                     1.937
                      5662                     1.874
                      5672                     1.719
                      5683                     1.986
                      5693                      2.17
                      5703                      1.97
                      5712                     2.492
                      5719                     2.137
                      5724                     2.375
                      5730                     2.335
                      5746                     2.033
                      5752                     2.217
                      5763                     2.208
                      5769                     2.083
                      5775                     2.155
                      5781                     2.344
                      5787                     2.195
                      5793                     1.977
                      5798                     1.944
                      5804                     2.159
                      5810                     2.061
                      5816                     1.985
                      5823                     2.276
                      5834                      1.91
                      5844                     1.836
                      5854                     2.155
                      5864                       1.9
                      5883                     2.079
                      5895                     2.283
                      5905                     1.958
                      5916                     2.163
                      5926                     2.134
                      5936                     2.284
                      5946                     2.133
                      5957                     2.031
                      5967                     2.318
                      5977                     2.129
                      5997                     2.082
