# Supplementary material for: A general theory on frequency and time-frequency analysis of irregularly sampled time series based on projection methods. I. Frequency analysis
Source: Copernicus journal article supplement (doi:10.5194/npg-2017-26), 2017-07-04
Supplement: Supplementary file 50 [file npg-2017-26-supplement.zip › supplementary_material/code/data/source.txt]

Z. Jian, Q. Zhao, X. Cheng, J. Wang, P. Wang, and X. Su. Pliocene-pleistocene stable isotope and paleoceanographic changes in the northern south china sea. Palaeogeography, Palaeoclimatology, Palaeoecology, 193(3–4):425–442, 2003.
