# Supplementary material for: A general theory on frequency and time-frequency analysis of irregularly sampled time series based on projection methods. I. Frequency analysis
Source: Copernicus journal article supplement (doi:10.5194/npg-2017-26), 2017-07-04
Supplement: Supplementary file 50 [file npg-2017-26-supplement.zip › supplementary_material/code/Example_with_ODP1148.ipynb]

# %% [markdown]
# Application on paleoceanographic data (ODP1148)

# %% [markdown]
## 1. Reading the data and initializing Wavepal

# %% [markdown]
Start importing wavepal and other usual packages

# %% [code]
% matplotlib inline  
import numpy as np
import matplotlib.pyplot as plt
import copy
import wavepal as wv

# %% [code]
mypath="../figures/ODP1148_example/"

# %% [markdown]
Read the data

# %% [code]
data=np.genfromtxt("data/ODP1148-BF-18O.txt")
myt=data[:,0]
mydata=data[:,1]

# %% [markdown]
Initialize the class called Wavepal (which is a class of the package wv)

# %% [code]
x=wv.Wavepal(myt, mydata, "Age", "$\delta{}^{18}O$", t_units="ka", mydata_units="permil")

# %% [markdown]
## 2. Preliminary analysis

# %% [markdown]
Check the data set

# %% [code]
x.check_data()

# %% [markdown]
Figure of the time step in function of time, with an histogram of the distribution of the time steps

# %% [code]
plot_timestep=x.plot_timestep(nbins=20)
plot_timestep.title("Age step in function of age",fontsize=14)
plot_timestep.savefig(mypath+"timestep.pdf")
plot_timestep.show()

# %% [markdown]
Figure of the trend.

# %% [code]
plot_trend=x.plot_trend(pol_degree=7)  
plot_trend.title("Data and trend",fontsize=14)
plot_trend.savefig(mypath+"data_and_trend.pdf")
plot_trend.show()

# %% [markdown]
and choose the degree of the polynomial for the subsequent analyses

# %% [code]
x.choose_trend_degree(7)

# %% [markdown]
Compute some variables related to the trend

# %% [code]
x.trend_vectors()

# %% [markdown]
## 3. CARMA(p,q) Background Noise Analysis

# %% [code]
# Analytical + MCMC with median carma parameters
x.carma_params(signif_level_type="a",make_carma_fig=True,nbins=15,dpi=400,path_to_figure_folder=mypath+"carma_analytic/")
# Do some tricks to perform MCMC significance levels with a red noise of FIXED parameters (this is not provided by WAVEPAL by default)
x.nmcmc=50000
from gen_car1_wv33 import gen_car1
x.myn=gen_car1(x.t,x.alpha_unique[0]*np.ones(50000),x.sigwn_unique*np.ones(50000))
x.signif_level_type="an"

# %% [code]
# Full MCMC, taking into account the uncertainty on the parameters of the red noise
y=copy.copy(x)
y.carma_params(signif_level_type="an",nmcmc=50000,nbins=15)  

# %% [markdown]
## 4. Frequency Analysis

# %% [markdown]
Choose the $\textrm{x}^{\textrm{th}}$ percentiles for significance testing

# %% [code]
percentile=np.zeros(2)
percentile[0]=95.
percentile[1]=99.9

# %% [markdown]
Run the method for the frequency analysis

# %% [markdown]
Frequency analysis with confidence levels coming from the median parameters of the red noise

# %% [code]
x.freq_analysis(freqstep=0.0001,D=600.,percentile=percentile,n_moments=12,computes_amplitude=True)

# %% [markdown]
Frequency analysis with confidence levels taking into account the distribution of the parameters of the red noise

# %% [code]
y.freq_analysis(freqstep=0.0001,D=600.,percentile=percentile,n_moments=12)

# %% [markdown]
WOSA segmentation

# %% [code]
plot_WOSA_segmentation=x.plot_WOSA_segmentation()
plot_WOSA_segmentation.title("WOSA segmentation",fontsize=14)
plot_WOSA_segmentation.savefig(mypath+"WOSA_segmentation.pdf")
plot_WOSA_segmentation.show()

# %% [code]
# Frequency analysis with confidence levels coming from the median parameters of the red noise
plt.plot(x.freq,x.periodogram,"k",label="Data periodogram",linewidth=1.)
for k in range(x.percentile.size):
    plt.plot(x.freq,x.periodogram_cl_mcmc[:,k],label="MCMC CL at "+str(x.percentile[k])+"%"+" (from median param.)",linewidth=1)
    plt.plot(x.freq,x.periodogram_cl_anal[:,k],label="Anal. CL at "+str(x.percentile[k])+"%"+" (from median param.)",linewidth=1)
plt.legend(fancybox=True,fontsize=8,bbox_to_anchor=(1.1, 1.05))
plt.xlabel("Frequency"+" (ka${}^{-1}$)",fontsize=12)
plt.ylabel("Power"+" (permil${}^{2}$)",fontsize=12)
plt.suptitle("WOSA periodogram and confidence levels", fontsize=14)
plt.tick_params(labelsize=12)
fig = plt.gcf()
fig.set_size_inches(7, 4)
plt.savefig(mypath+"periodogram_median_params.pdf")
plt.show()

# %% [code]
# Frequency analysis with confidence levels taking into account the distribution of the parameters of the red noise
plot_periodogram=y.plot_periodogram(fontsize_legend=8)
plot_periodogram.suptitle("WOSA periodogram and confidence levels", fontsize=14)
fig = plt.gcf()
fig.set_size_inches(7, 4)
plot_periodogram.savefig(mypath+"periodogram_distr_params.pdf")
plot_periodogram.show()

# %% [code]
del y

# %% [markdown]
Number of WOSA segments per frequency 

# %% [code]
plot_number_WOSA_segments=x.plot_number_WOSA_segments()
plot_number_WOSA_segments.savefig(mypath+"number_WOSA_segments_per_frequency.pdf")
plot_number_WOSA_segments.show()

# %% [markdown]
Check the convergence of the analytical confidence levels

# %% [code]
plot_check_convergence_percentiles=x.plot_check_convergence_percentiles(fontsize_suptitle=13,fontsize_title=9,fontsize_axes=8,fontsize_ticks=6)
fig = plt.gcf()
fig.set_size_inches(6,5)
plot_check_convergence_percentiles.savefig(mypath+"check_convergence_percentiles.pdf")
plot_check_convergence_percentiles.show()

# %% [markdown]
Compare the squared amplitude vs the periodogram

# %% [code]
plot_amplitude_vs_periodogram=x.plot_amplitude_vs_periodogram(fontsize_legend=10)
plot_amplitude_vs_periodogram.suptitle("Squared amplitude vs weighted periodogram", fontsize=14)
plot_amplitude_vs_periodogram.savefig(mypath+"amplitude_vs_periodogram.pdf")
plot_amplitude_vs_periodogram.show()

# %% [markdown]
## 5. Sensitivity analysis for the trend degree

# %% [code]
x.signif_level_type=""

# %% [code]
x.choose_trend_degree(5)
x.trend_vectors()
x.freq_analysis(freqstep=0.0001,D=600.)
trend5=x.trend
freq5=x.freq
periodogram5=x.periodogram

# %% [code]
x.choose_trend_degree(6)
x.trend_vectors()
x.freq_analysis(freqstep=0.0001,D=600.)
trend6=x.trend
freq6=x.freq
periodogram6=x.periodogram

# %% [code]
x.choose_trend_degree(7)
x.trend_vectors()
x.freq_analysis(freqstep=0.0001,D=600.)
trend7=x.trend
freq7=x.freq
periodogram7=x.periodogram

# %% [code]
x.choose_trend_degree(8)
x.trend_vectors()
x.freq_analysis(freqstep=0.0001,D=600.)
trend8=x.trend
freq8=x.freq
periodogram8=x.periodogram

# %% [code]
x.choose_trend_degree(9)
x.trend_vectors()
x.freq_analysis(freqstep=0.0001,D=600.)
trend9=x.trend
freq9=x.freq
periodogram9=x.periodogram

# %% [code]
x.choose_trend_degree(10)
x.trend_vectors()
x.freq_analysis(freqstep=0.0001,D=600.)
trend10=x.trend
freq10=x.freq
periodogram10=x.periodogram

# %% [code]
plt.plot(x.t,mydata,label="Data")
plt.plot(x.t,trend5,label="m=5")
plt.plot(x.t,trend6,label="m=6")
plt.plot(x.t,trend7,label="m=7")
plt.plot(x.t,trend8,label="m=8")
plt.plot(x.t,trend9,label="m=9")
plt.plot(x.t,trend10,label="m=10")
plt.xlabel("Age (ka)")
plt.ylabel("$\delta{}^{18}O$ (permil)")
plt.title("Polynomial trends of different degrees")
plt.legend(fancybox=True,fontsize='small')
plt.savefig(mypath+"comparison_trends_ts.pdf")
plt.show()

# %% [code]
plt.plot(freq5,periodogram5,label="m=5")
plt.plot(freq6,periodogram6,label="m=6")
plt.plot(freq7,periodogram7,label="m=7")
plt.plot(freq8,periodogram8,label="m=8")
plt.plot(freq9,periodogram9,label="m=9")
plt.plot(freq10,periodogram10,label="m=10")
plt.xlabel("Frequency"+" (ka${}^{-1}$)")
plt.ylabel("Power"+" (permil${}^{2}$)")
plt.title("WOSA periodograms for different degrees of the trend")
plt.legend(fancybox=True,fontsize='small')
plt.savefig(mypath+"comparison_trends_periodogram.pdf")
plt.show()
