# Supplementary material for: A general theory on frequency and time-frequency analysis of irregularly sampled time series based on projection methods. I. Frequency analysis
Source: Copernicus journal article supplement (doi:10.5194/npg-2017-26), 2017-07-04
Supplement: Supplementary file 50 [file npg-2017-26-supplement.zip › supplementary_material/code/README.txt]

Which code generates which figure?
——————————————————————————————————
Fig. 2: periodogram_plus_mean.py
Fig. 3: analytical_variance_periodogram_red_noise.py
Fig. 4: approx_Lomb_generalized.py
Fig. 5 to 11: Example_with_ODP1148.ipynb (to open with the ipython notebook - you can read the file on GitHub)
Fig. 12: ODP1148_sensitivity_background_noise.py
Fig. 13: CPU_elixir/comparison_CPU_anal_vs_mcmc.py (run it on a server)
