# Supplementary figures and images for: A general theory on frequency and time-frequency analysis of irregularly sampled time series based on projection methods. I. Frequency analysis
Source: Copernicus journal article supplement (doi:10.5194/npg-2017-26), 2017-07-04

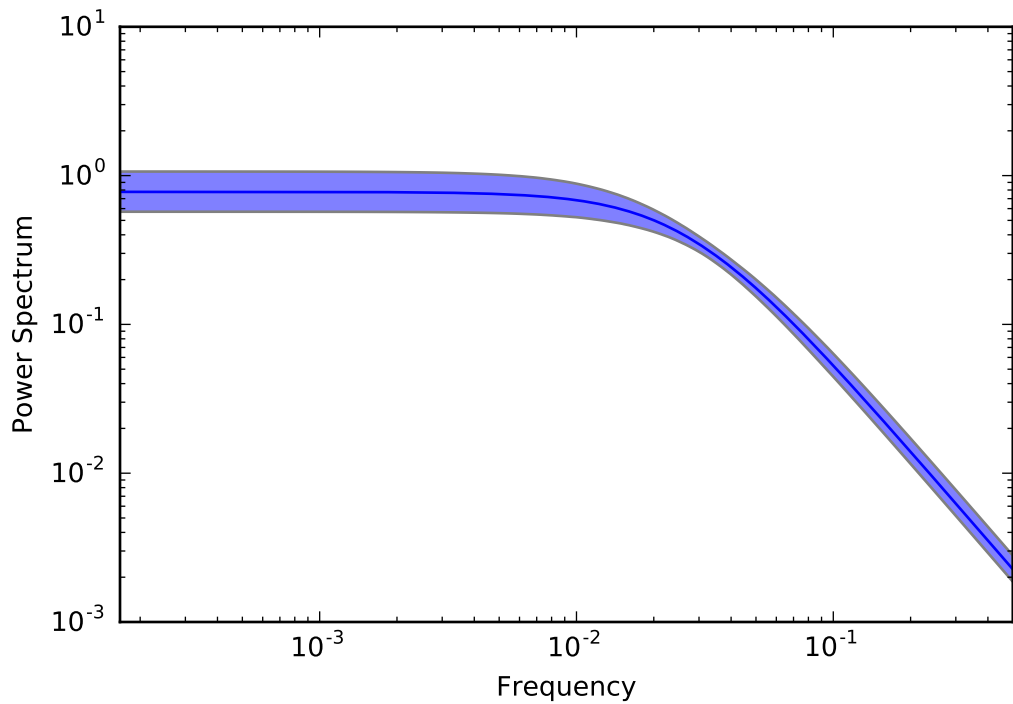

Supplement: Supplementary file 1 [file npg-2017-26-supplement.zip]

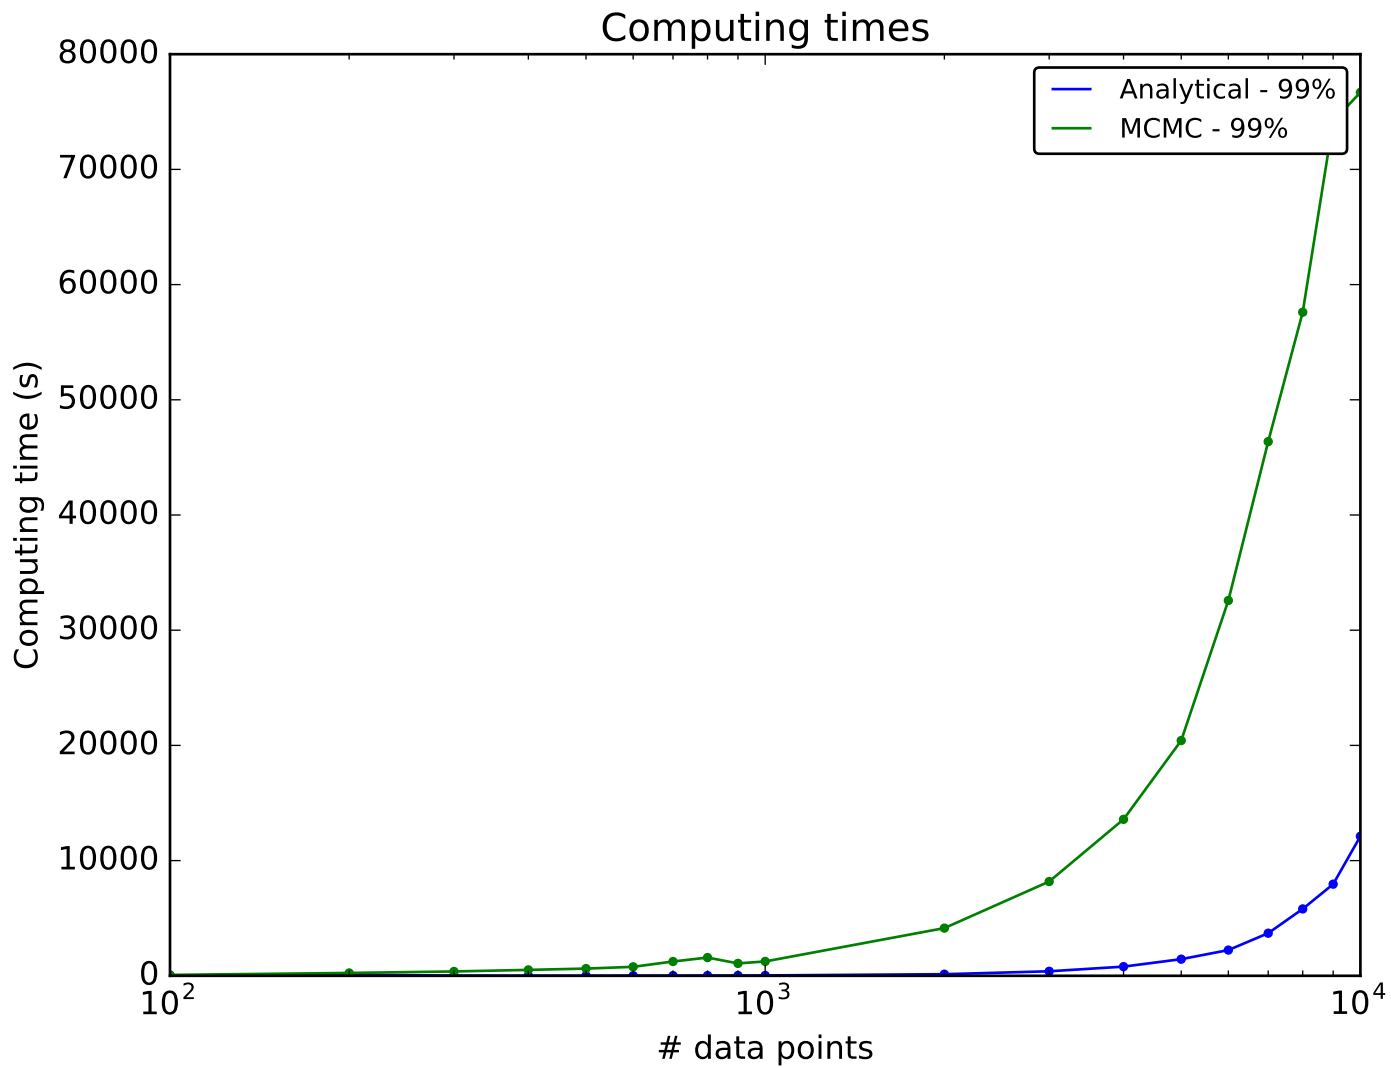

Supplement: Supplementary file 2 [file npg-2017-26-supplement.zip]

Computing times

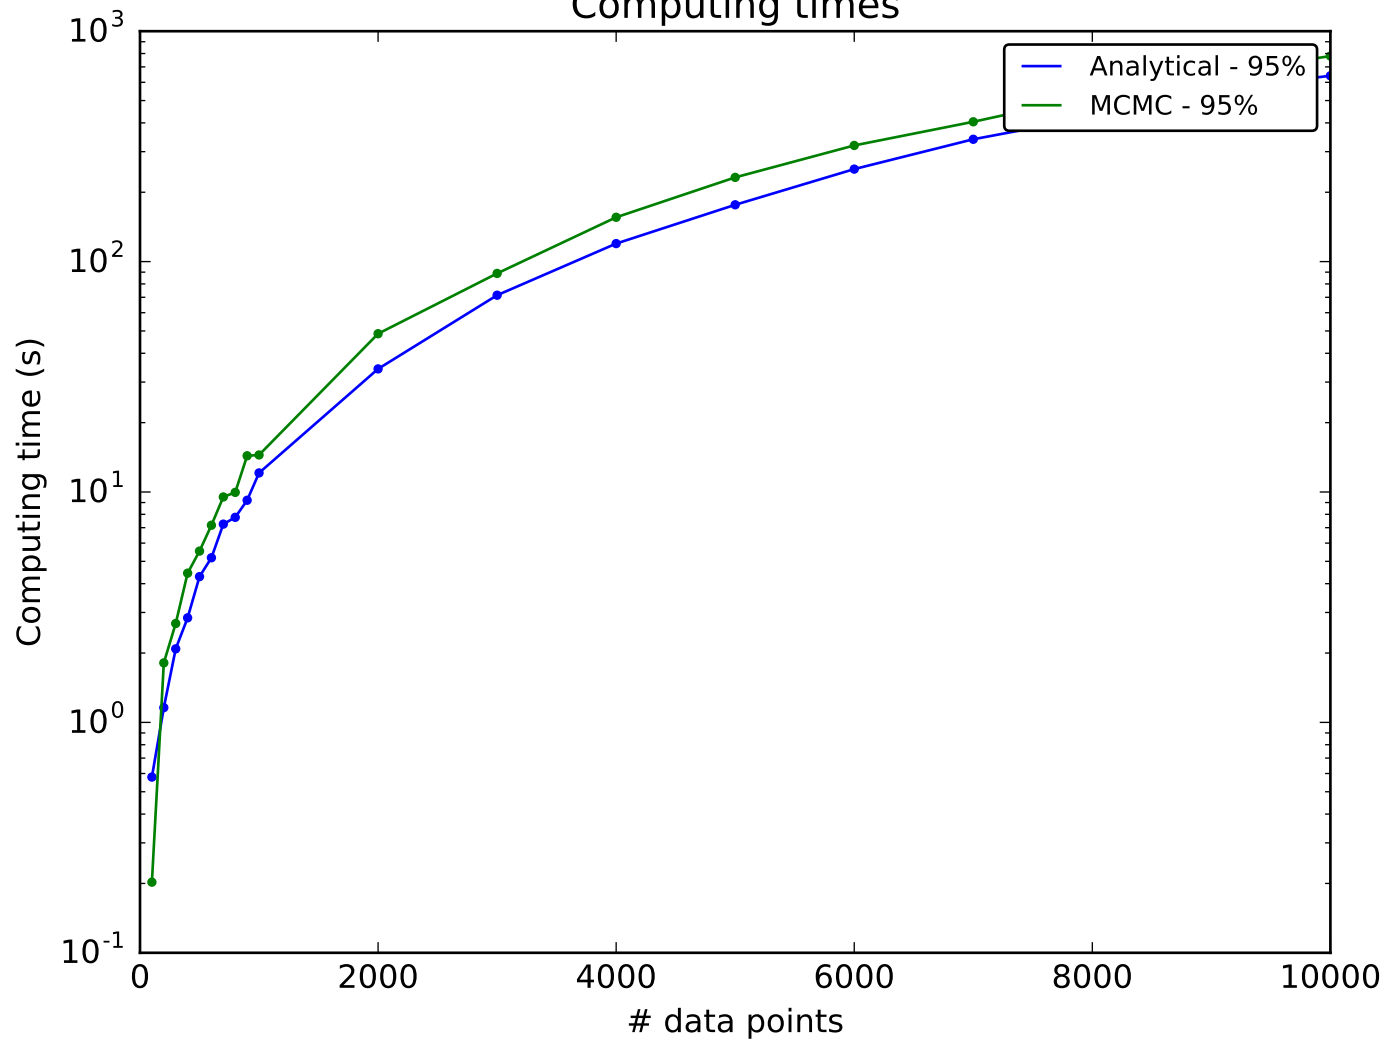

Supplement: Supplementary file 3 [file npg-2017-26-supplement.zip]

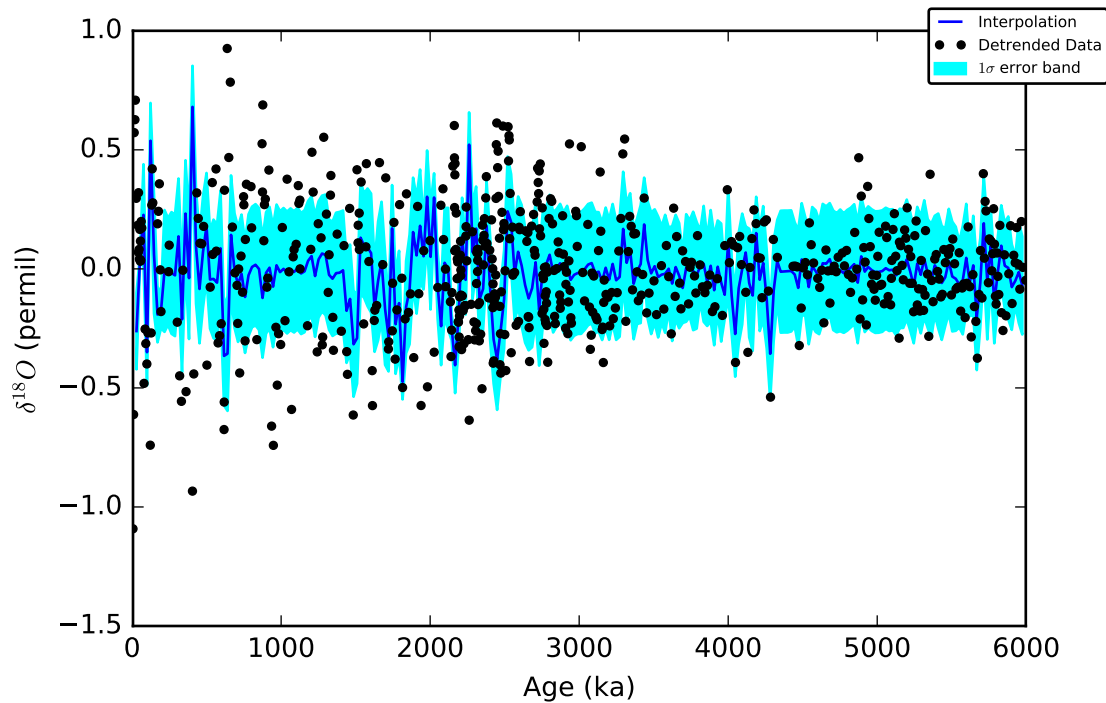

Supplement: Supplementary file 4 [file npg-2017-26-supplement.zip]

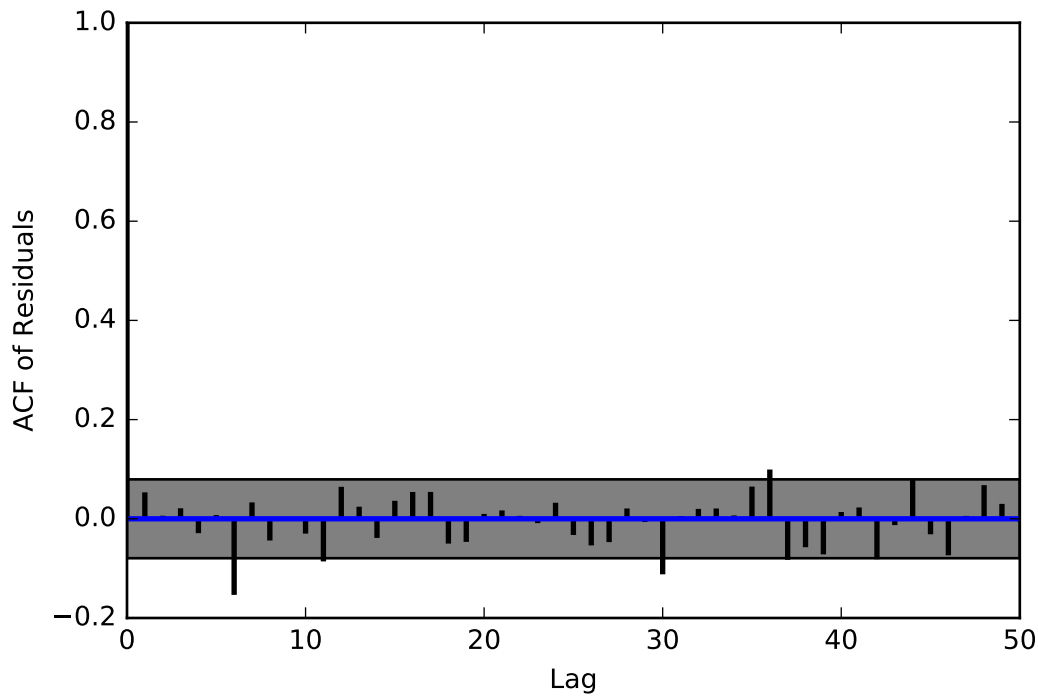

Supplement: Supplementary file 5 [file npg-2017-26-supplement.zip]

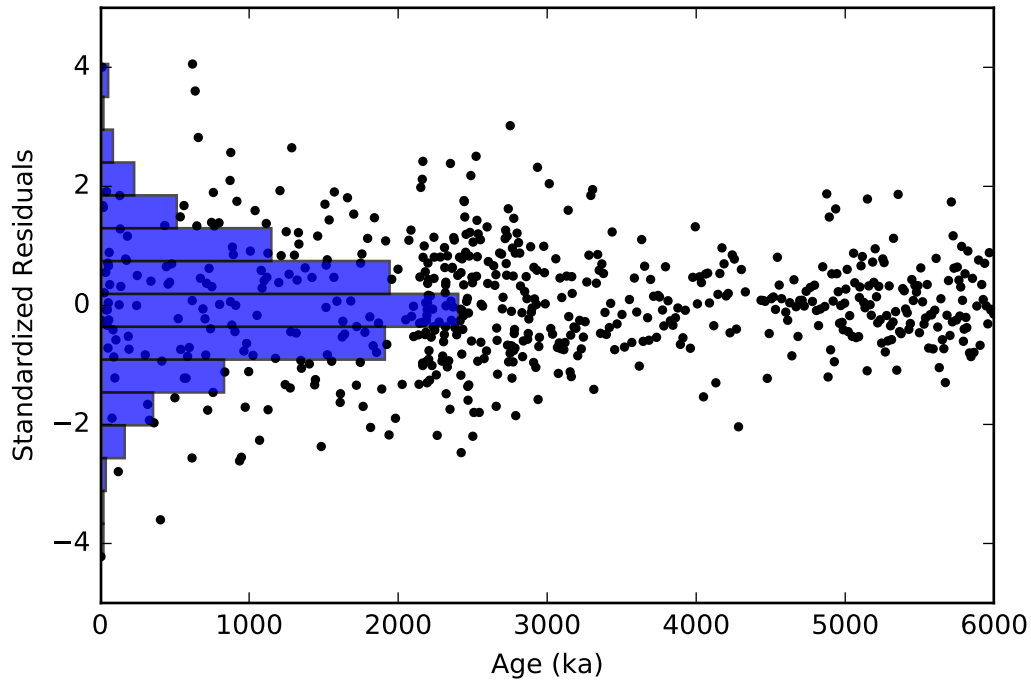

Supplement: Supplementary file 6 [file npg-2017-26-supplement.zip]

Marginal distribution of  $\mu$

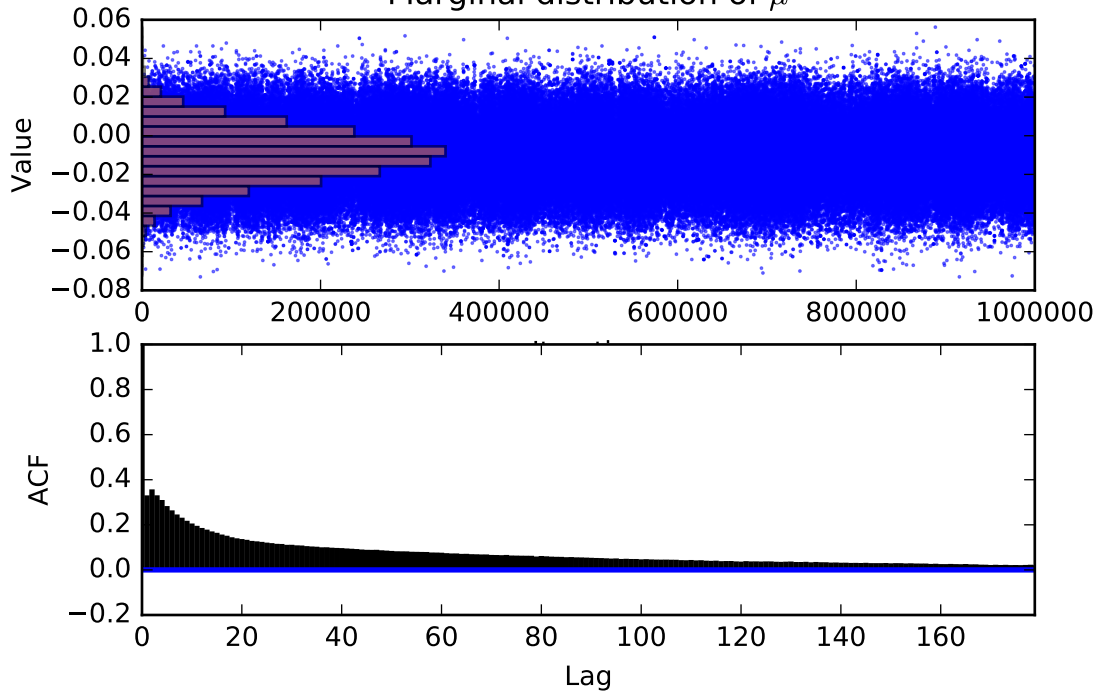

Supplement: Supplementary file 7 [file npg-2017-26-supplement.zip]

Computing times

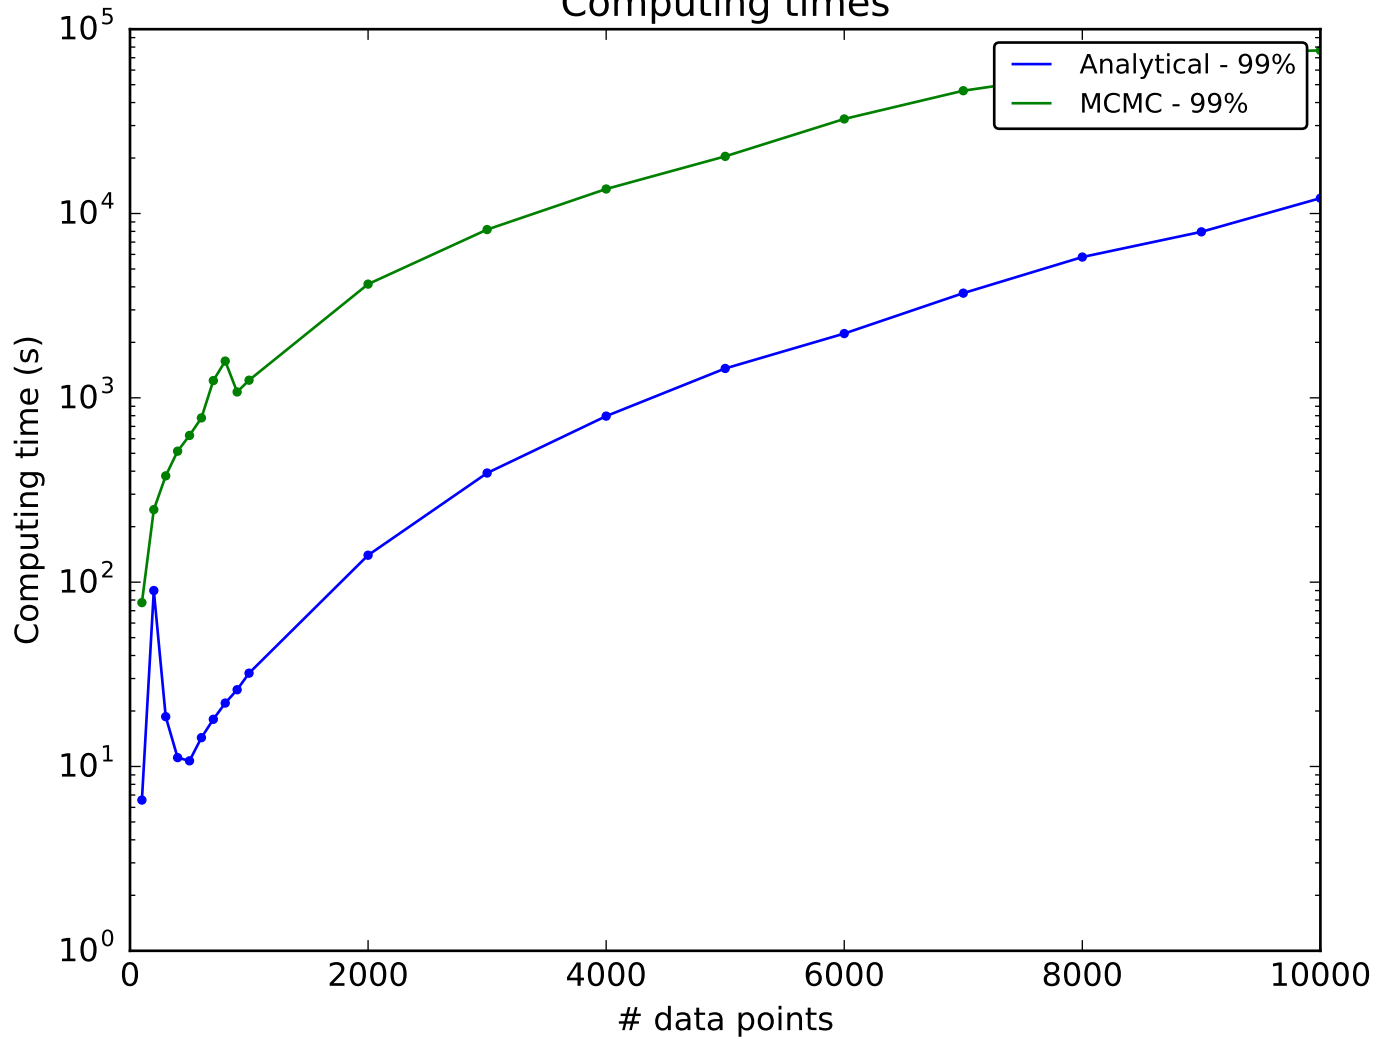

Supplement: Supplementary file 8 [file npg-2017-26-supplement.zip]

Marginal distribution of  $\sigma$

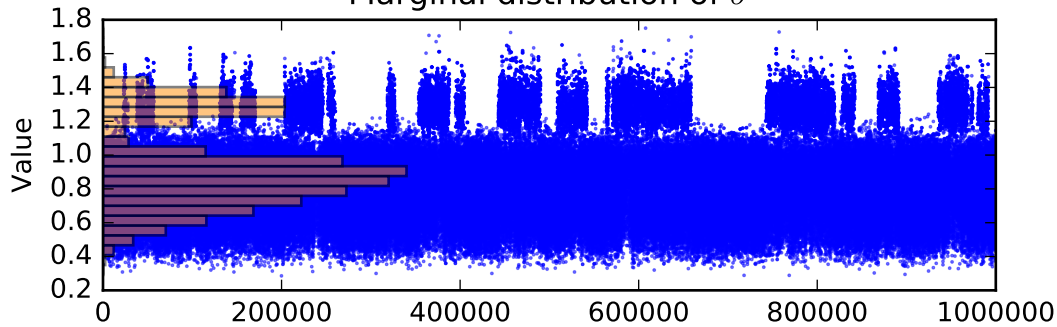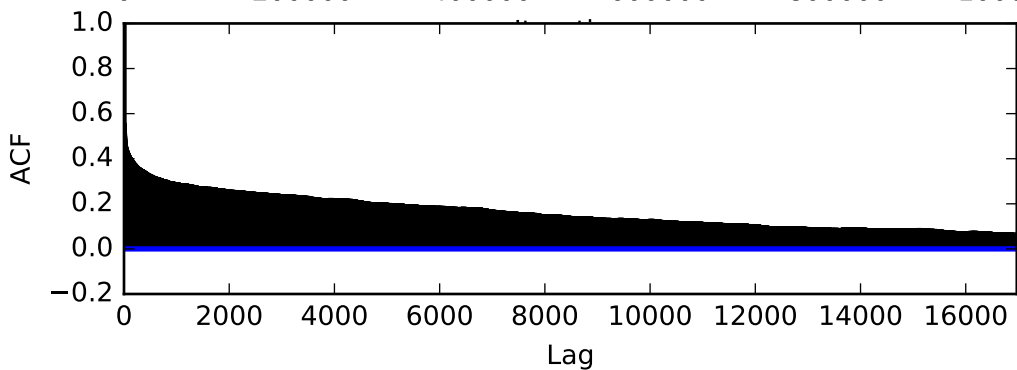

Supplement: Supplementary file 9 [file npg-2017-26-supplement.zip]

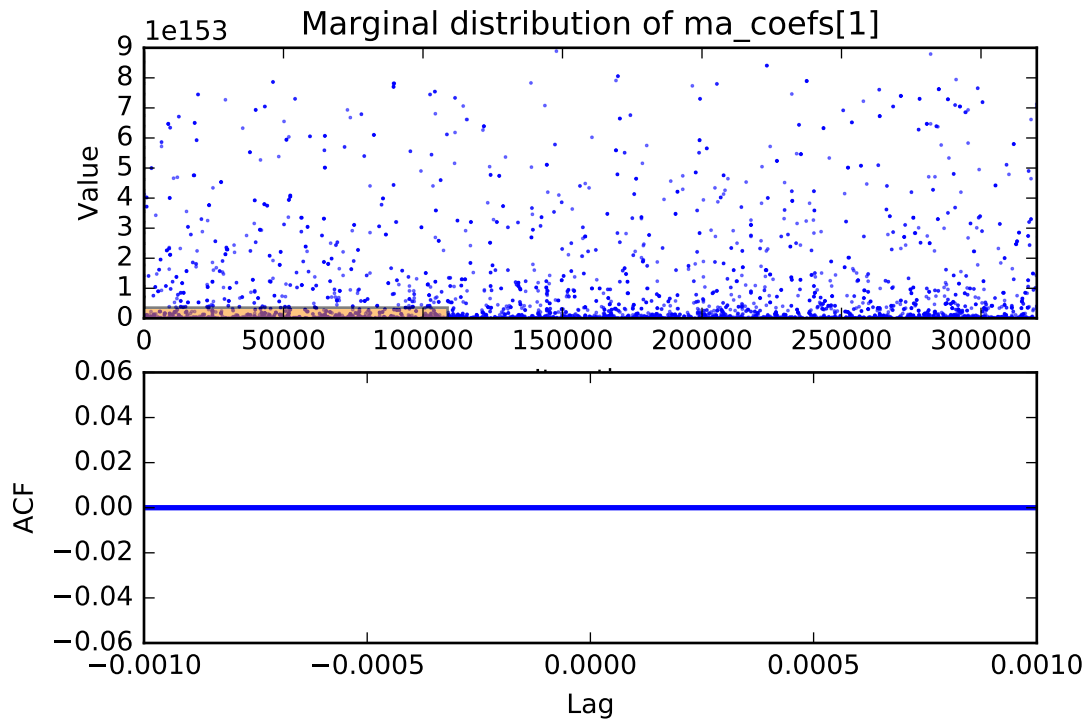

Supplement: Supplementary file 10 [file npg-2017-26-supplement.zip]

Computing times

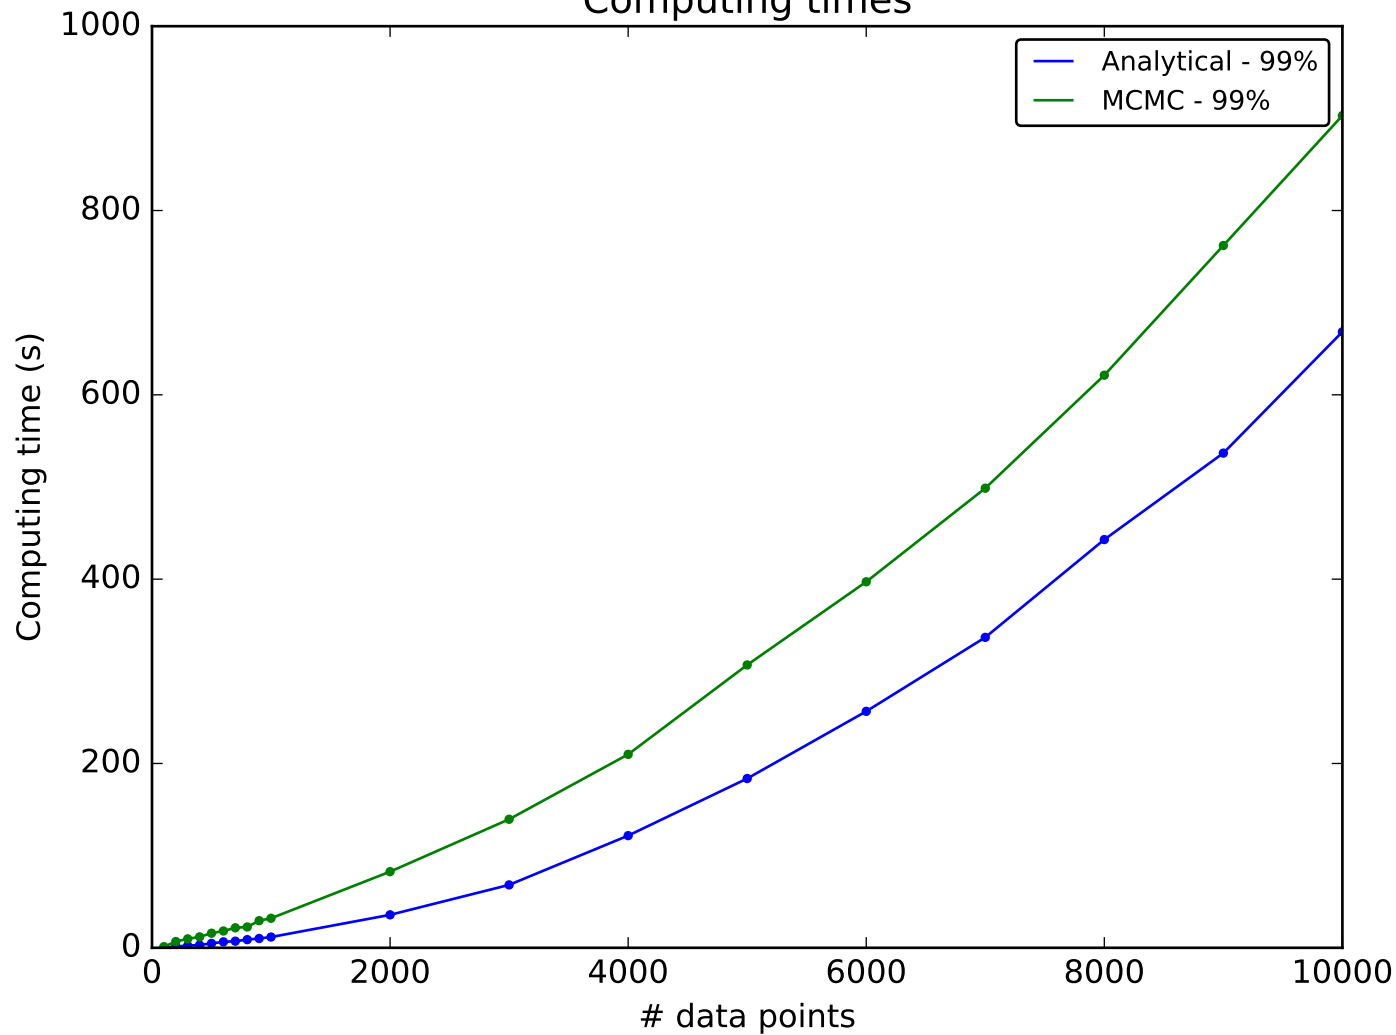

Supplement: Supplementary file 11 [file npg-2017-26-supplement.zip]

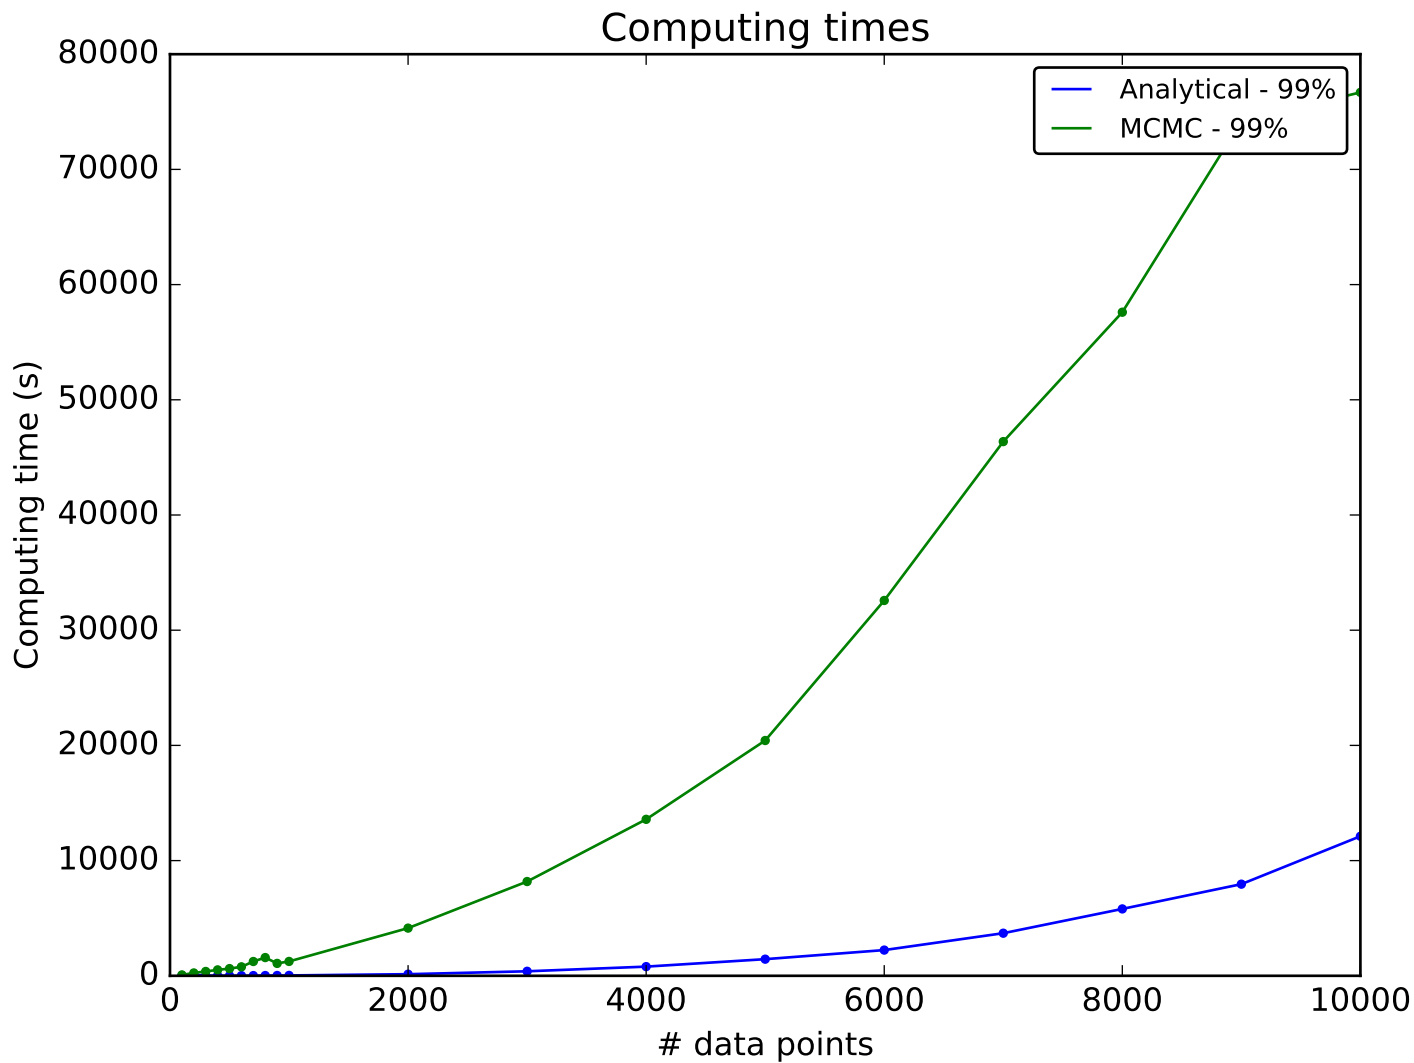

Supplement: Supplementary file 12 [file npg-2017-26-supplement.zip]

Marginal distribution of ar\_coefs[2]

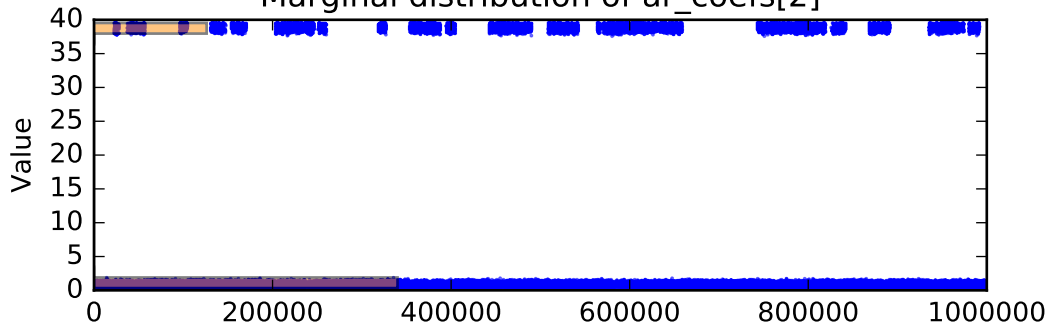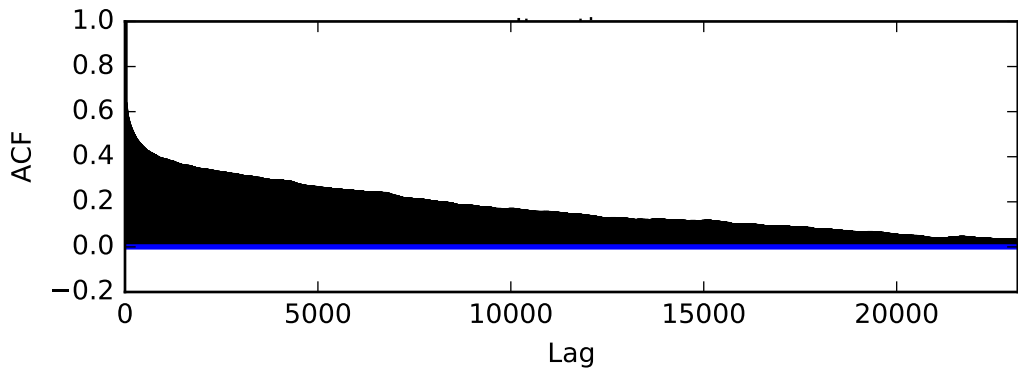

Supplement: Supplementary file 13 [file npg-2017-26-supplement.zip]

ACF of Sqrd. Resid.

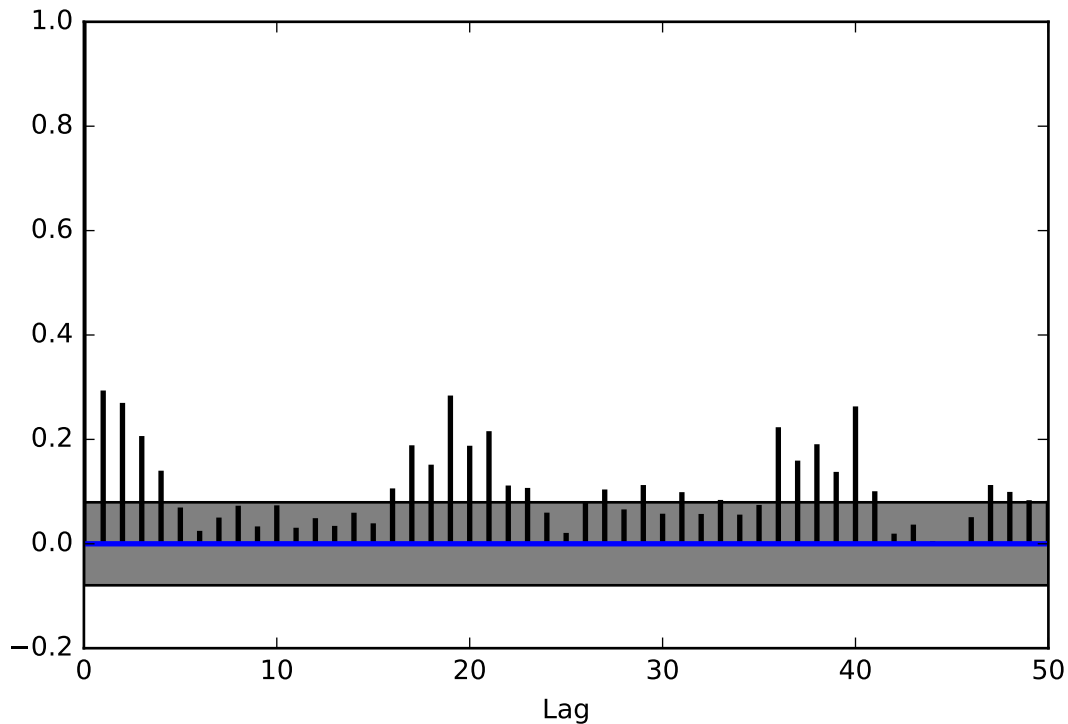

Supplement: Supplementary file 14 [file npg-2017-26-supplement.zip]

Computing times

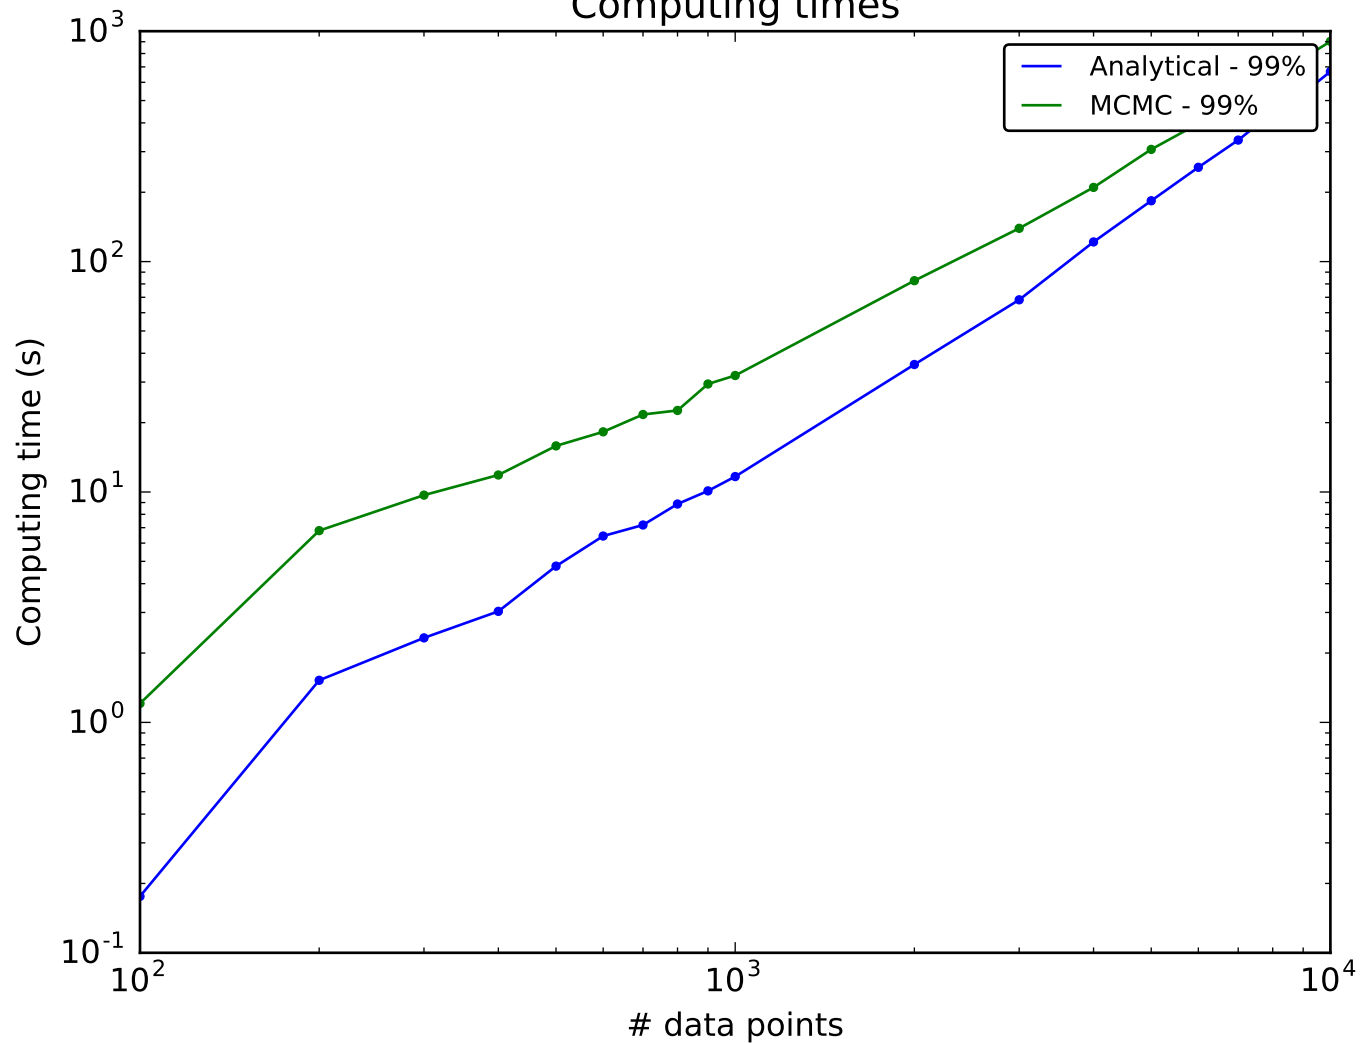

Supplement: Supplementary file 15 [file npg-2017-26-supplement.zip]

Age step in function of age

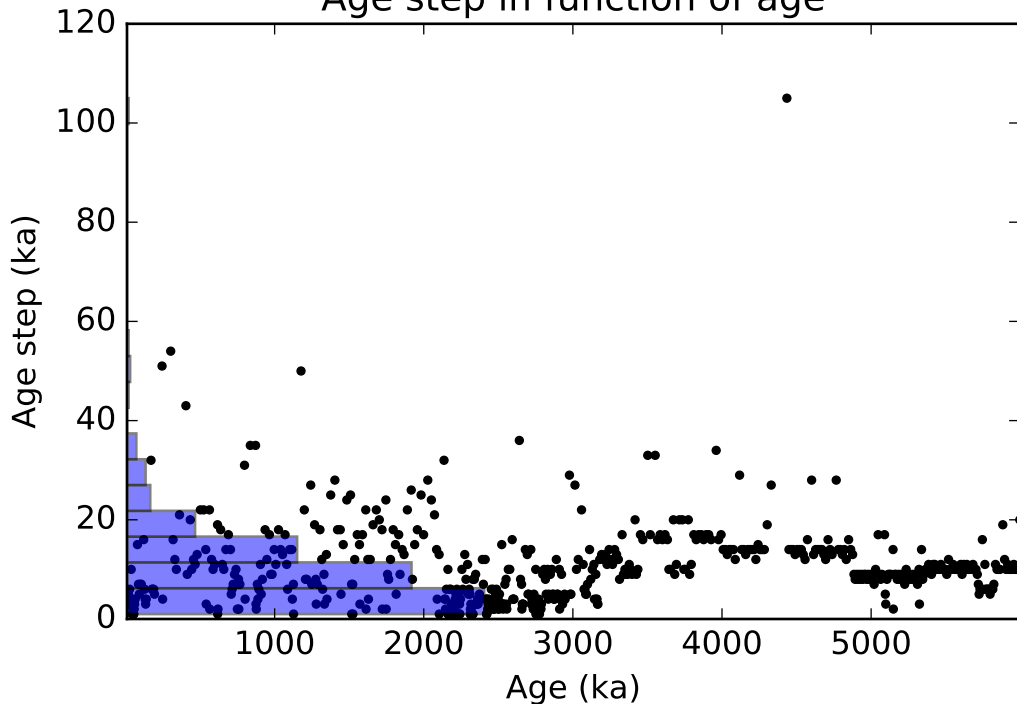

Supplement: Supplementary file 16 [file npg-2017-26-supplement.zip]

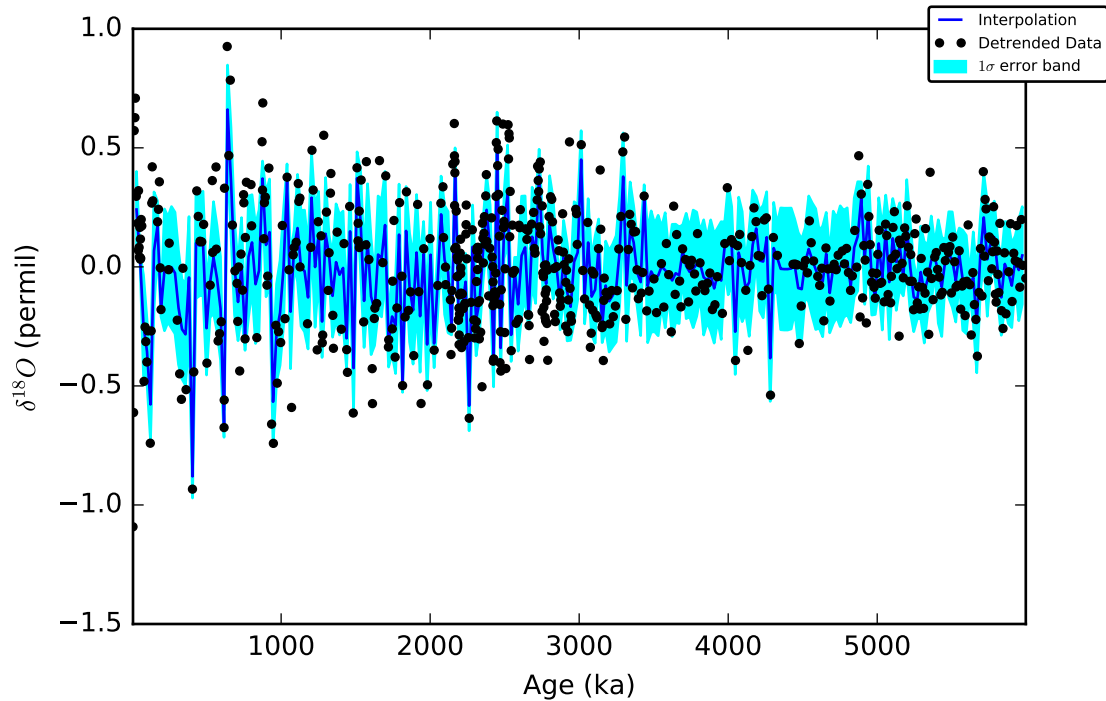

Supplement: Supplementary file 17 [file npg-2017-26-supplement.zip]

Analytical variance of the WOSA periodogram  
for the background noise

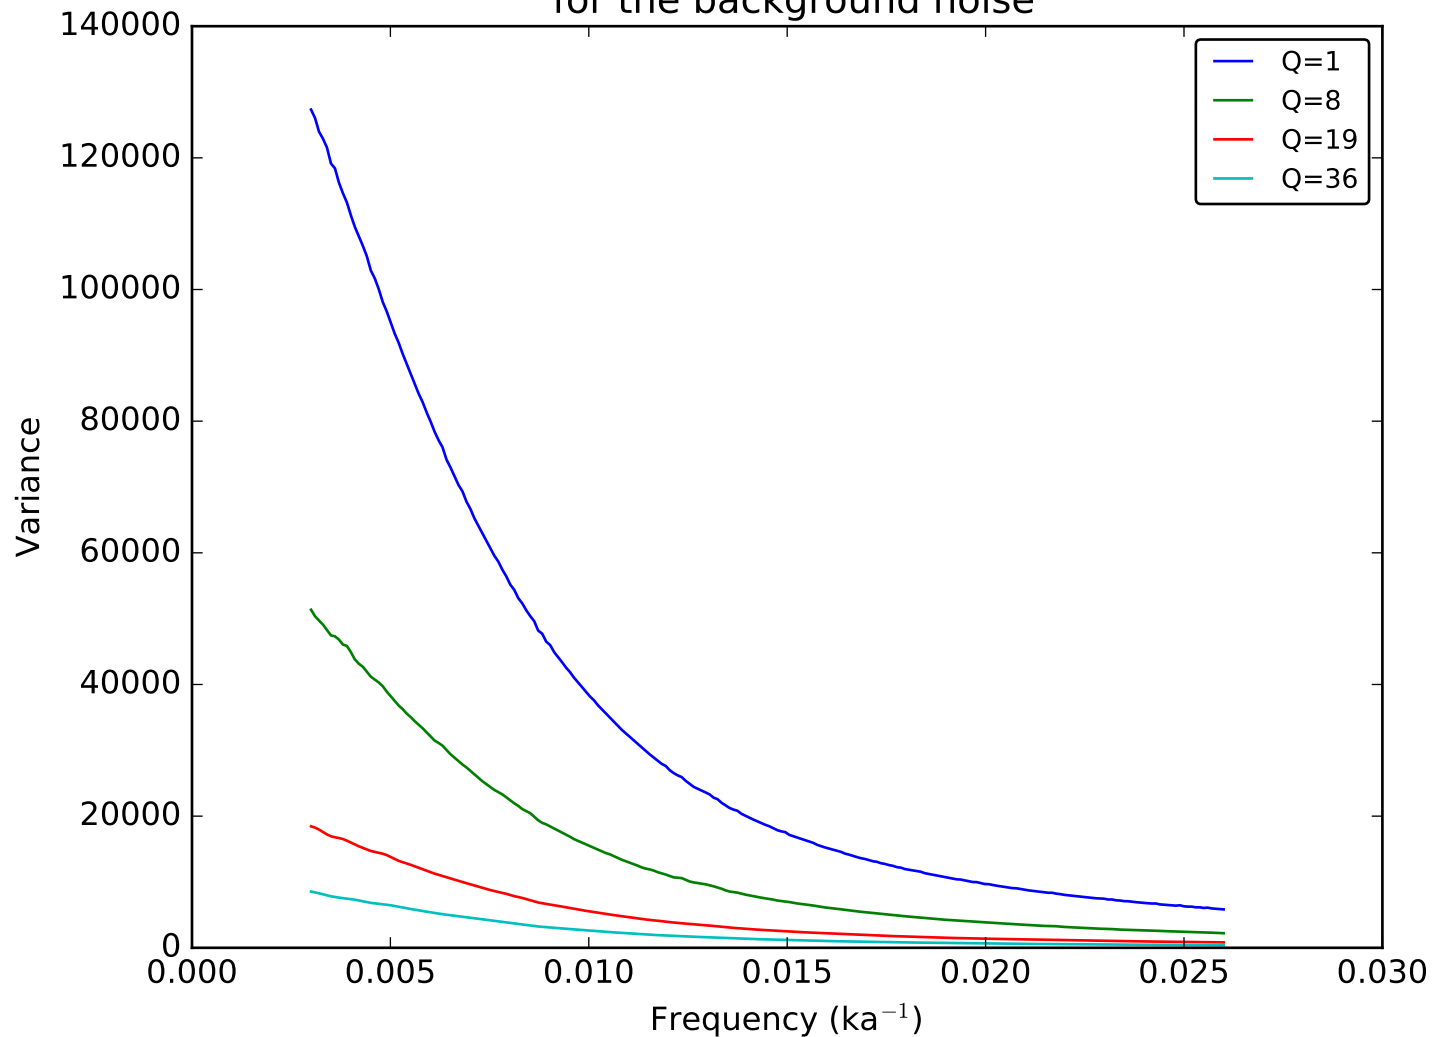

Supplement: Supplementary file 18 [file npg-2017-26-supplement.zip]

ACF of Sqrd. Resid.

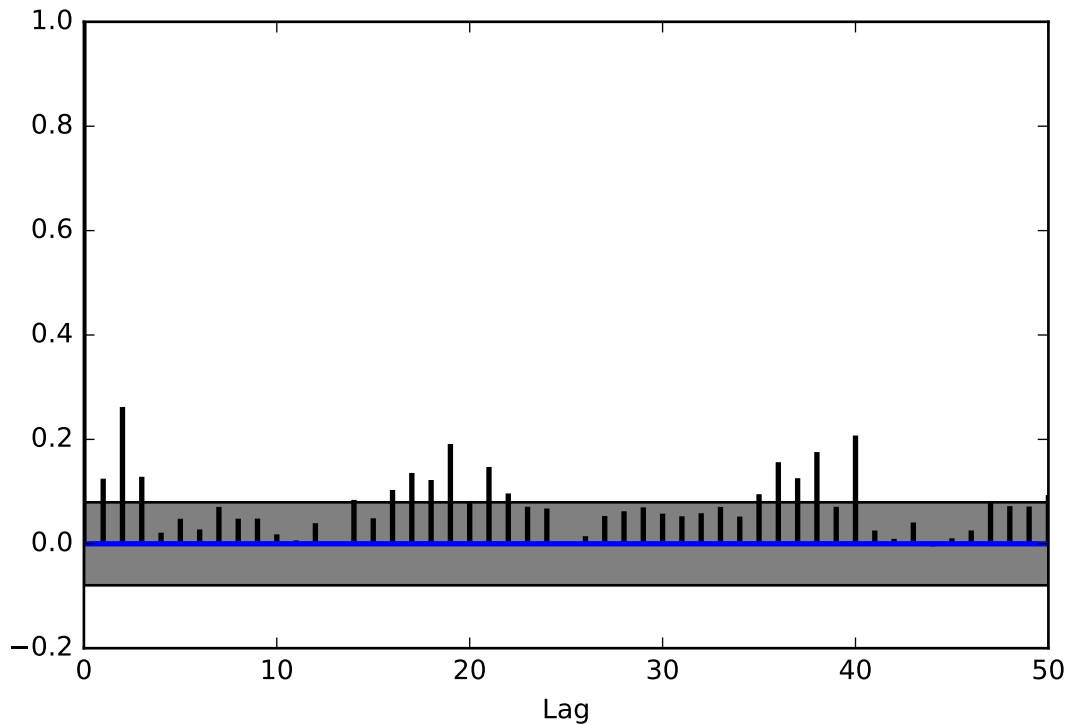

Supplement: Supplementary file 19 [file npg-2017-26-supplement.zip]

Polynomial trends of different degrees

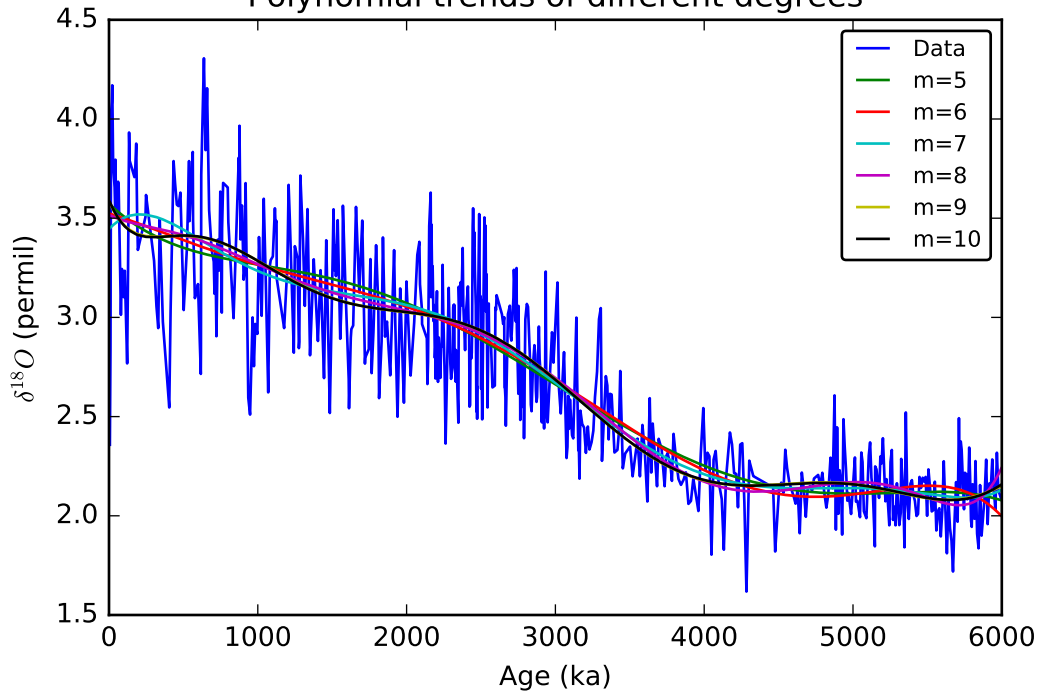

Supplement: Supplementary file 20 [file npg-2017-26-supplement.zip]

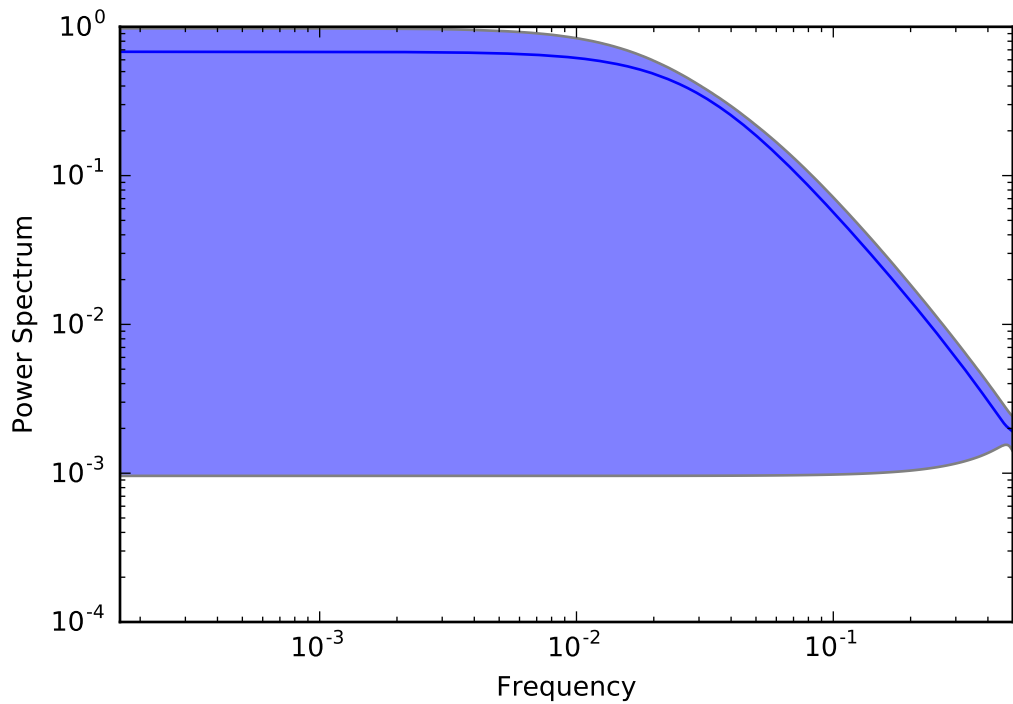

Supplement: Supplementary file 21 [file npg-2017-26-supplement.zip]

Marginal distribution of the process variance

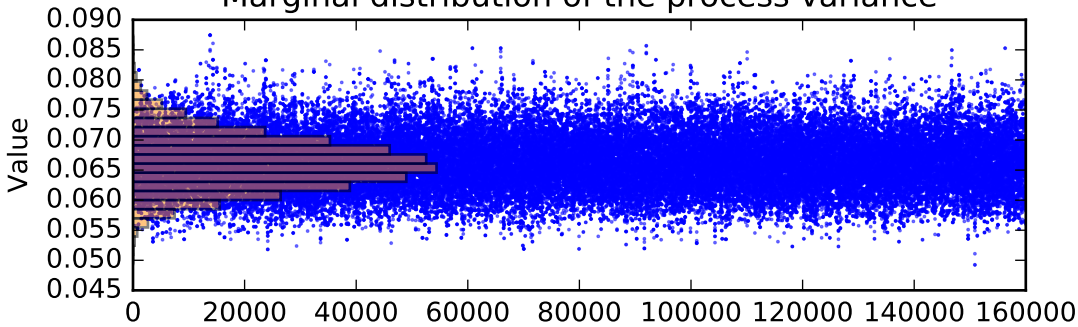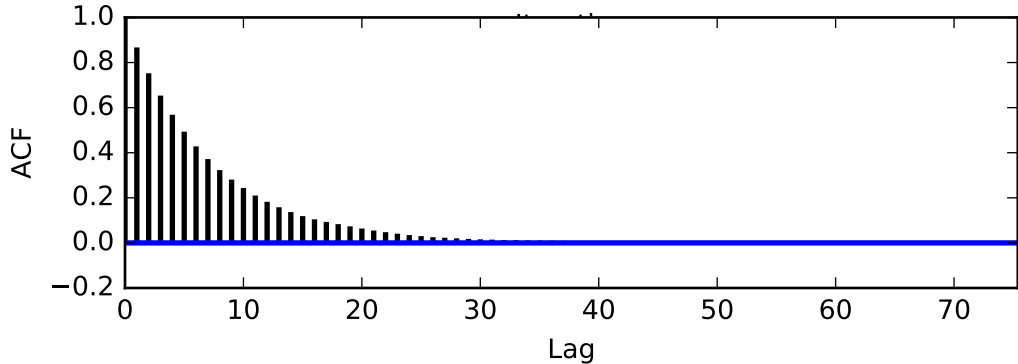

Supplement: Supplementary file 22 [file npg-2017-26-supplement.zip]

Computing times

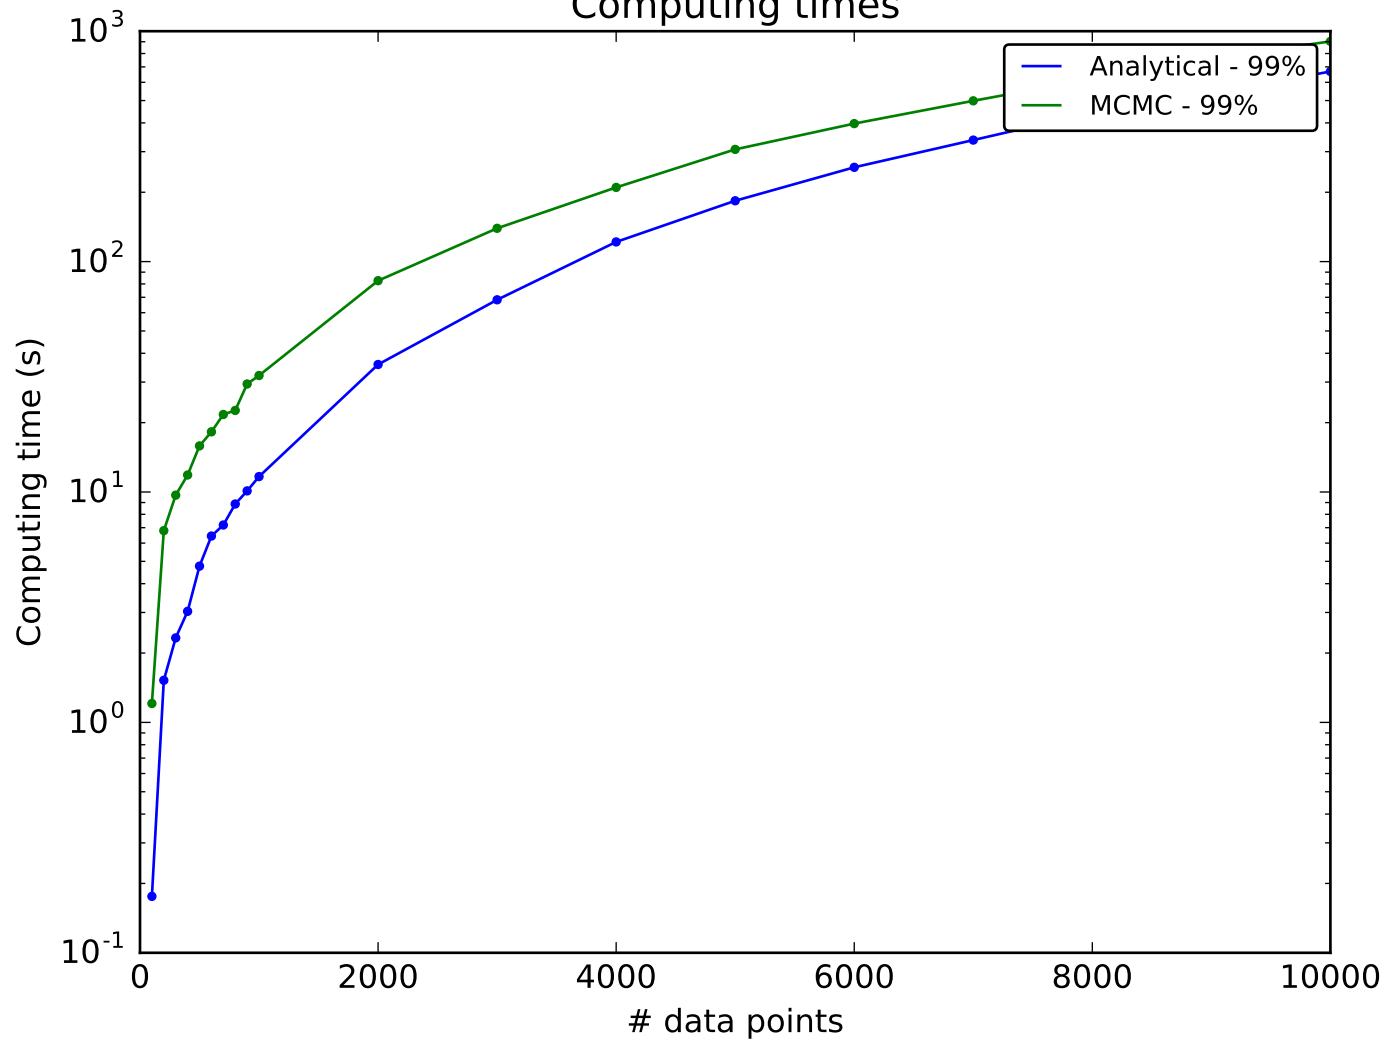

Supplement: Supplementary file 23 [file npg-2017-26-supplement.zip]

Computing times

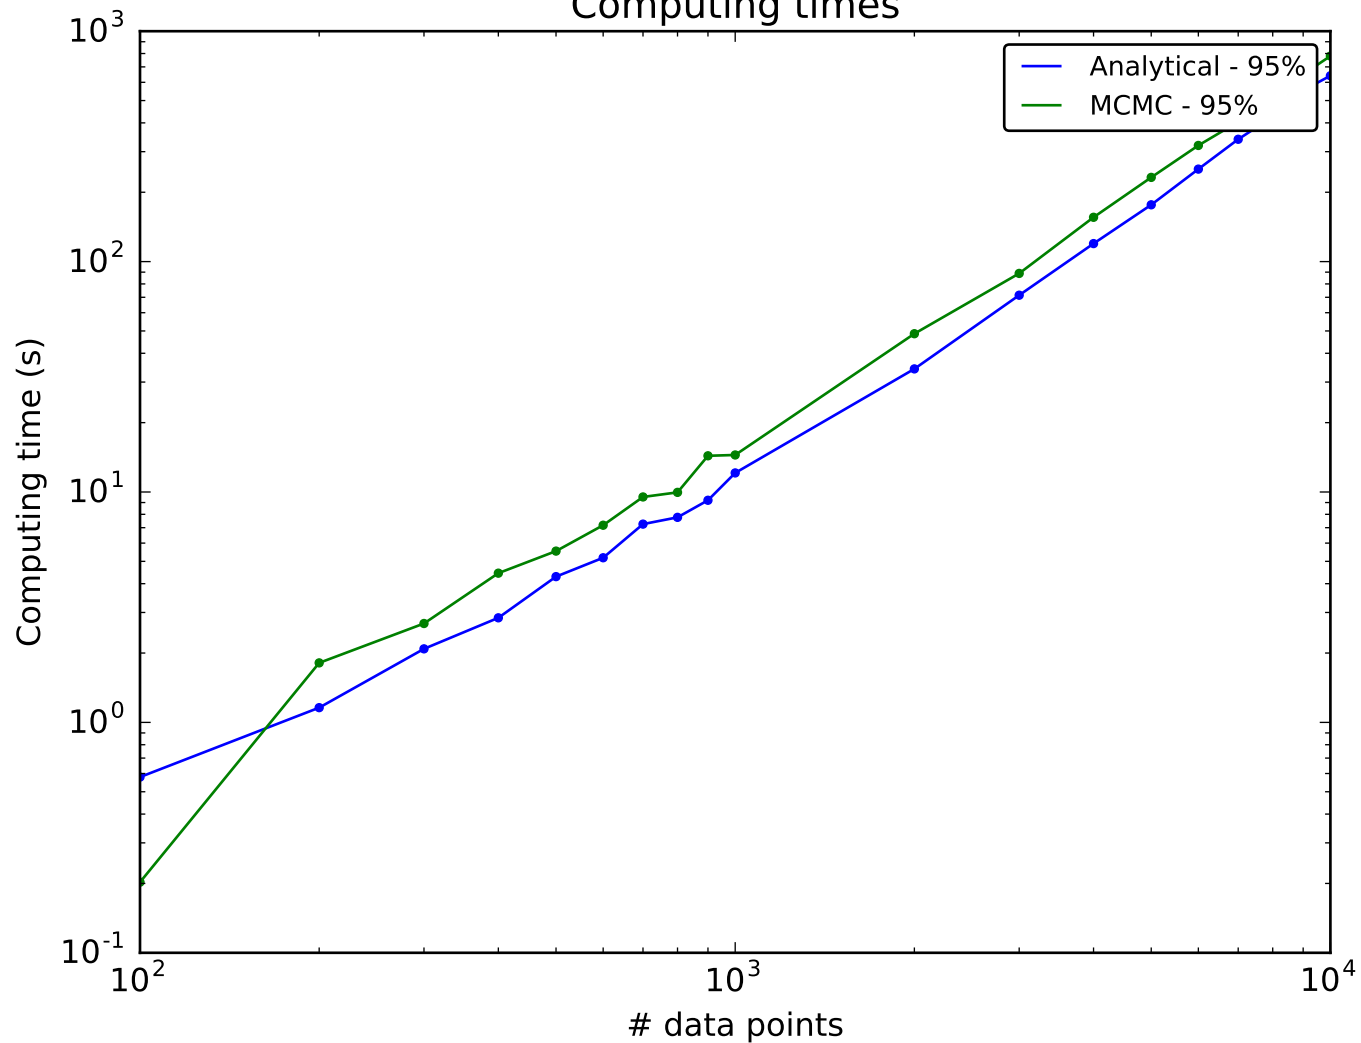

Supplement: Supplementary file 24 [file npg-2017-26-supplement.zip]

Computing times

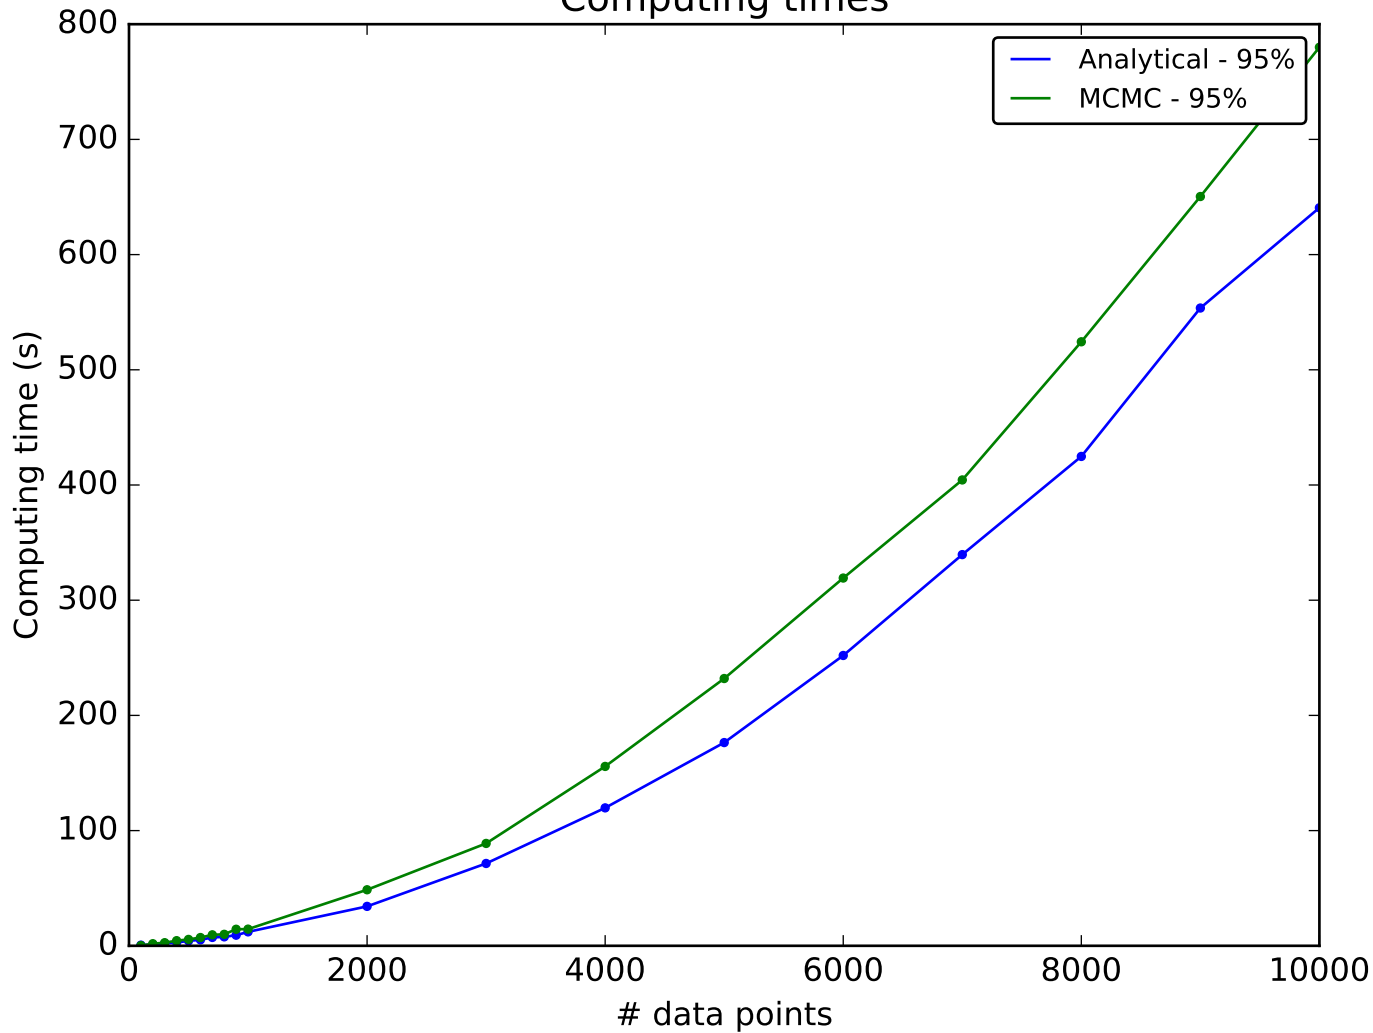

Supplement: Supplementary file 25 [file npg-2017-26-supplement.zip]

# WOSA segmentation

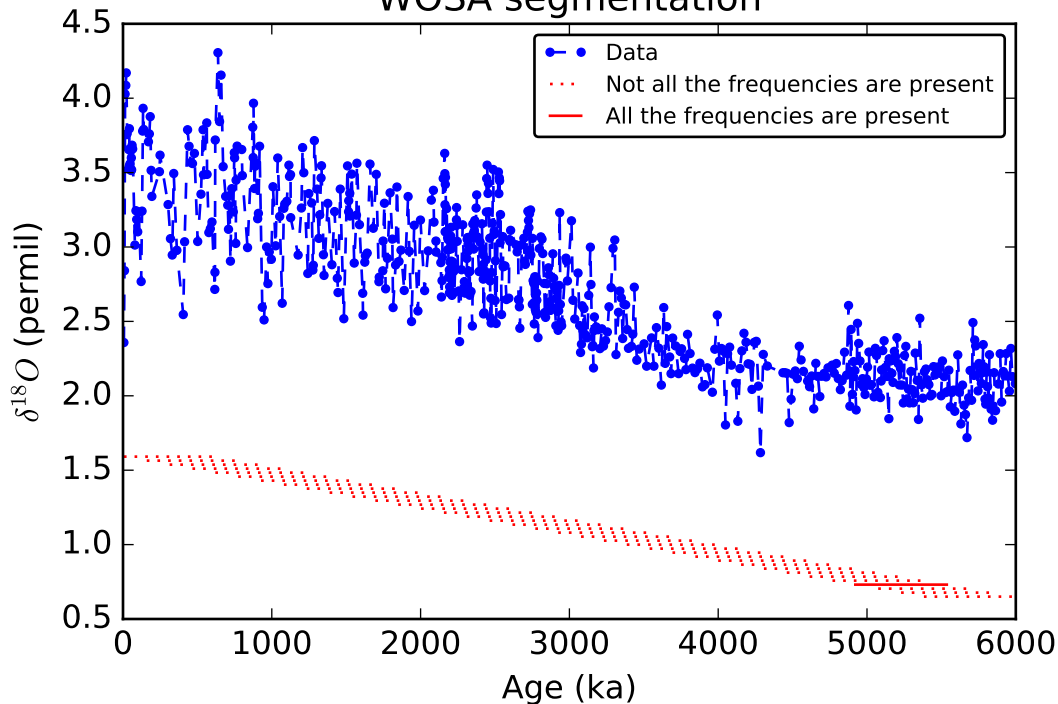

Supplement: Supplementary file 27 [file npg-2017-26-supplement.zip]

Marginal distribution of  $\log(\alpha)$

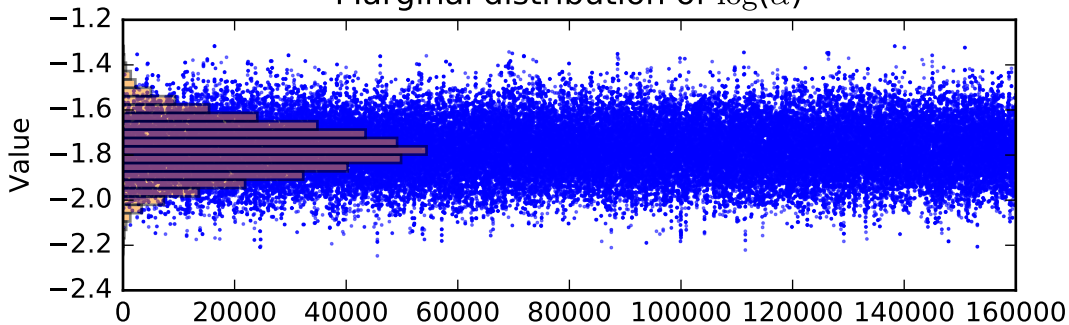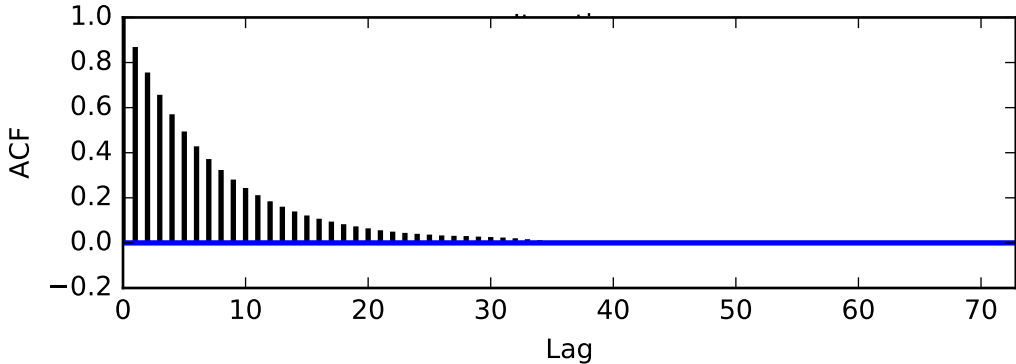

Supplement: Supplementary file 28 [file npg-2017-26-supplement.zip]

Computing times

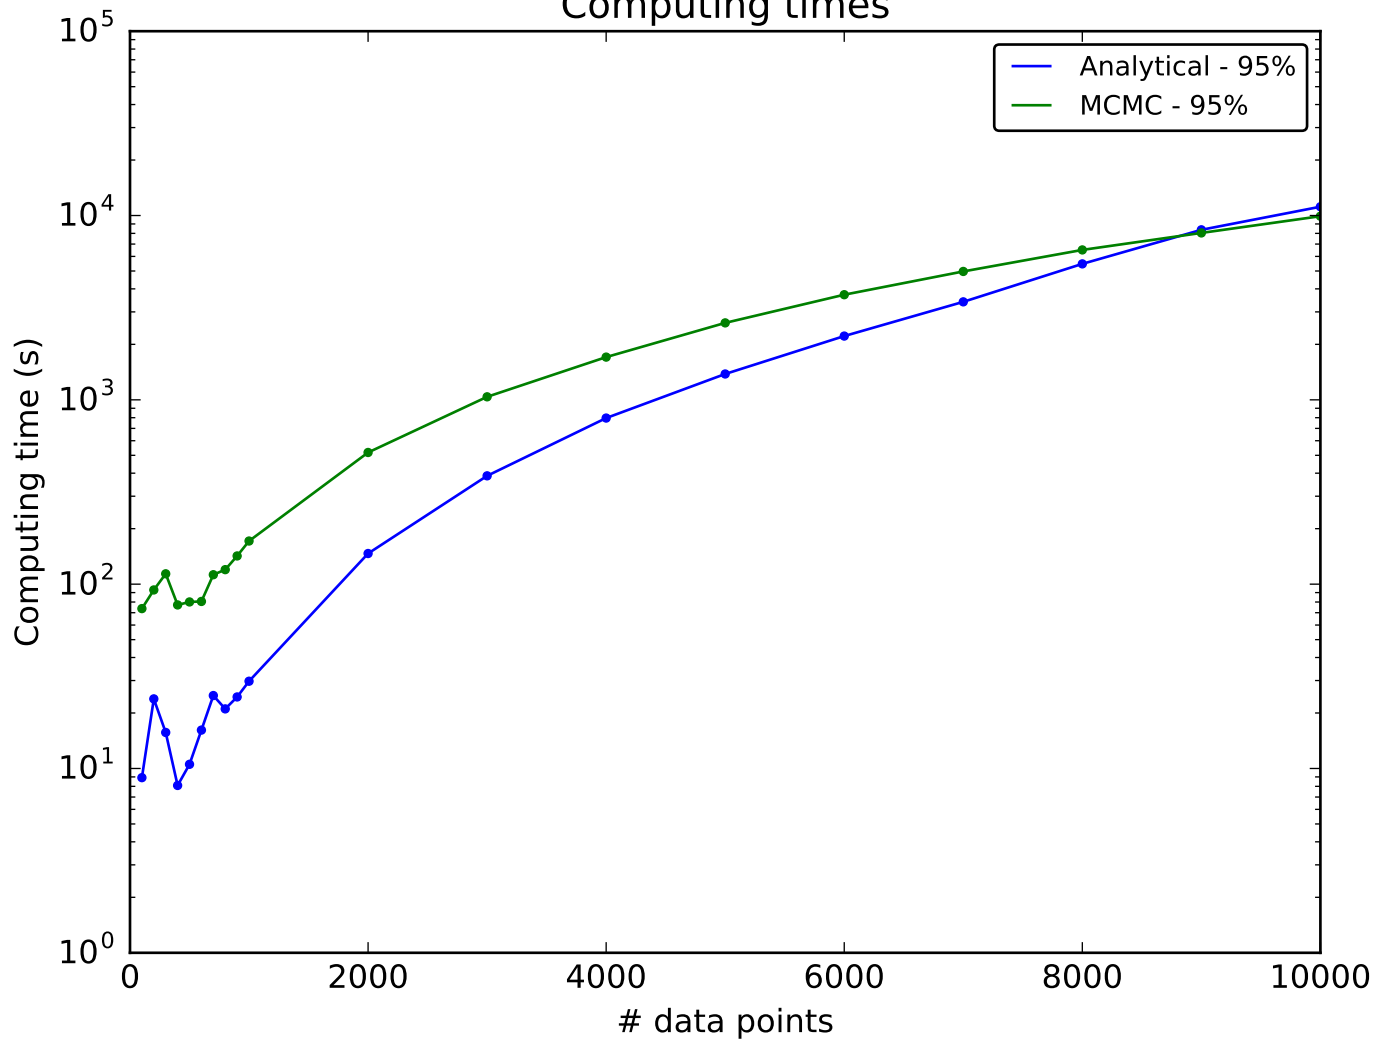

Supplement: Supplementary file 29 [file npg-2017-26-supplement.zip]

Marginal distribution of the process variance

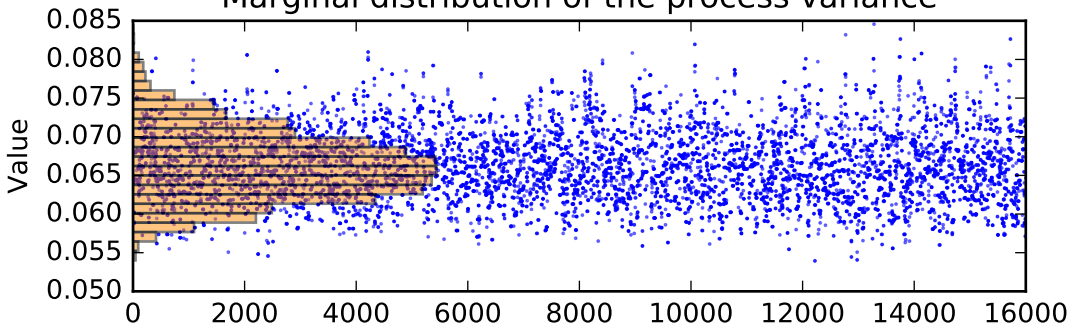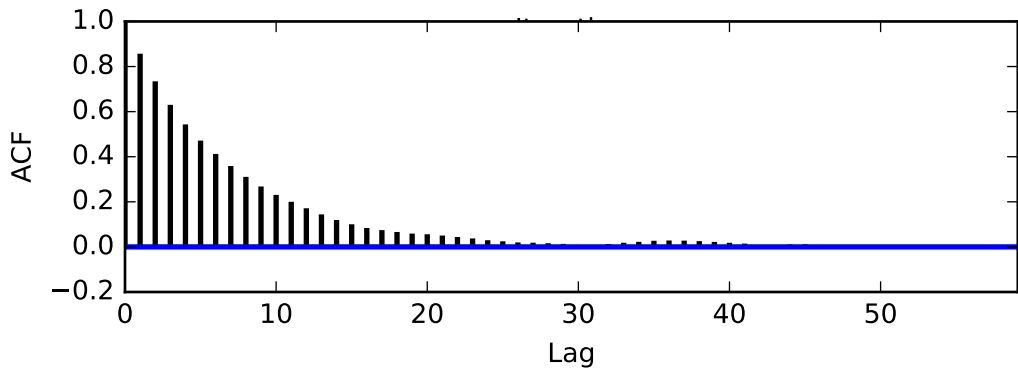

Supplement: Supplementary file 30 [file npg-2017-26-supplement.zip]

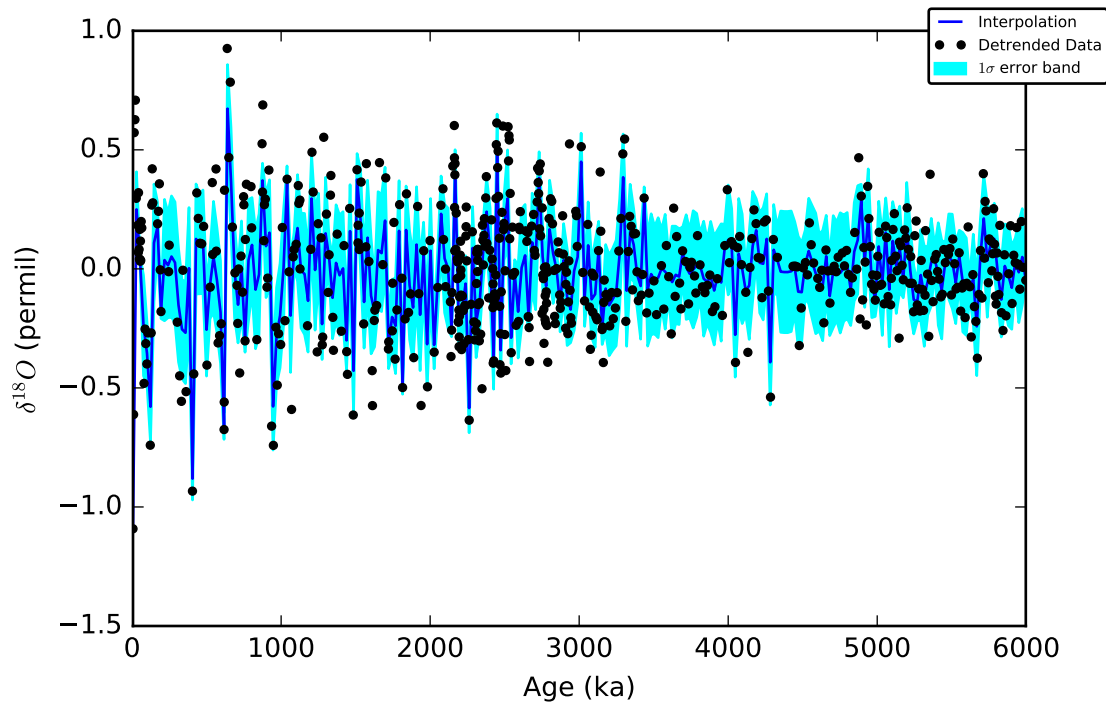

Supplement: Supplementary file 31 [file npg-2017-26-supplement.zip]

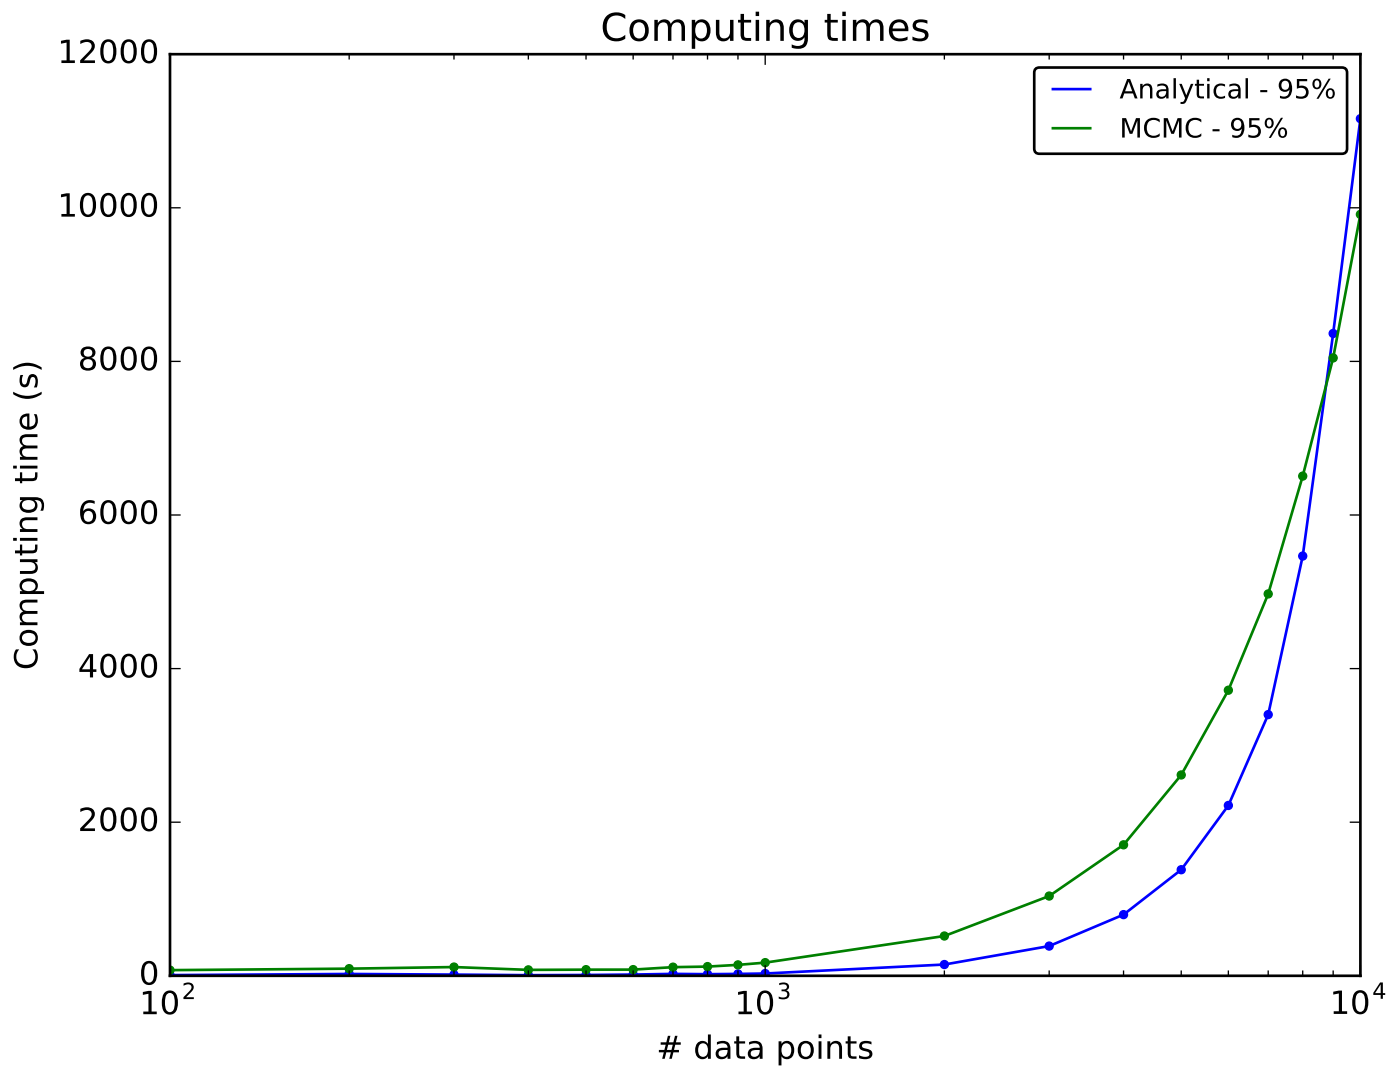

Supplement: Supplementary file 32 [file npg-2017-26-supplement.zip]

Computing times

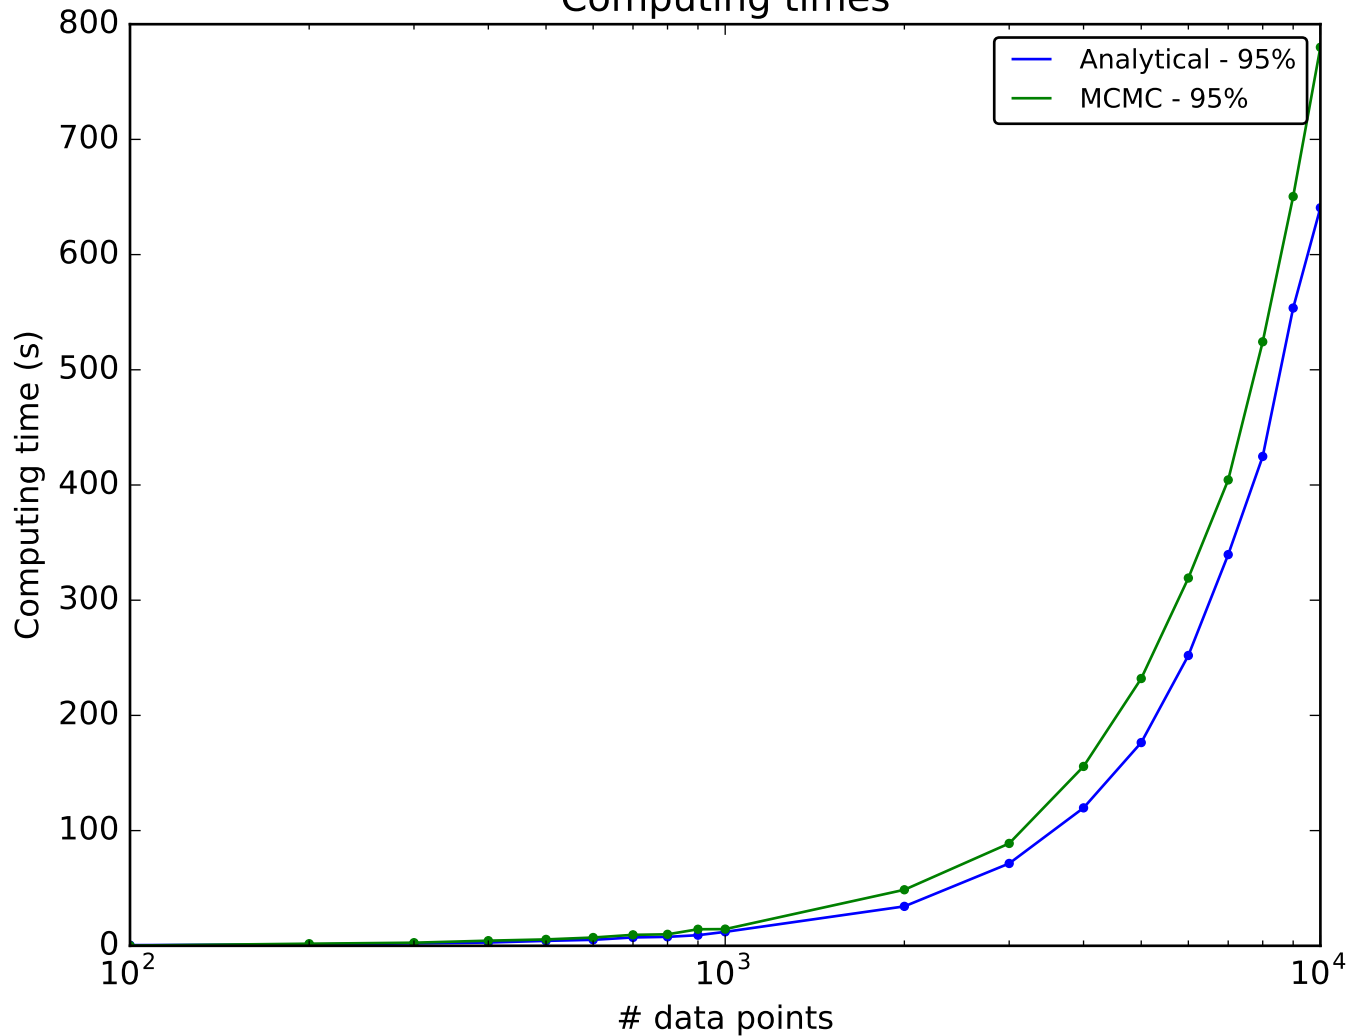

Supplement: Supplementary file 33 [file npg-2017-26-supplement.zip]

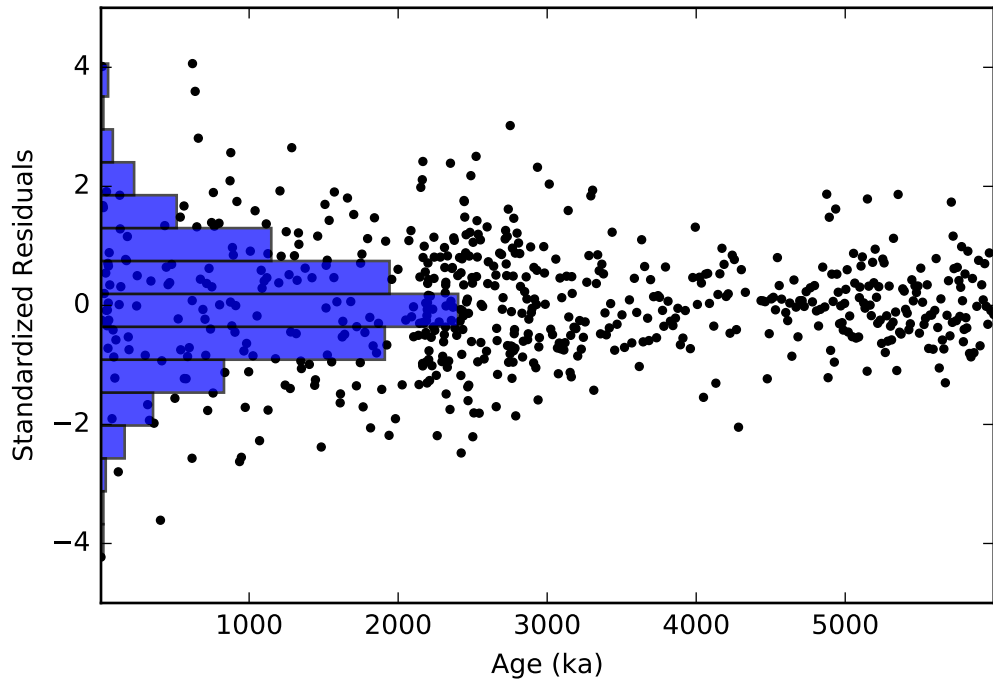

Supplement: Supplementary file 34 [file npg-2017-26-supplement.zip]

Marginal distribution of  $\sigma$

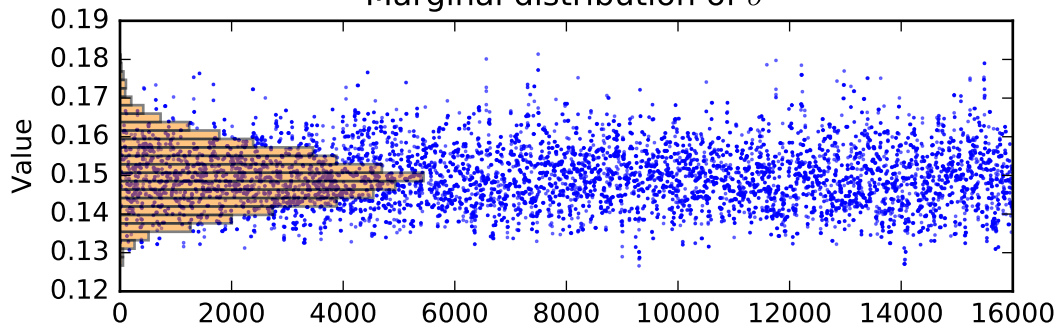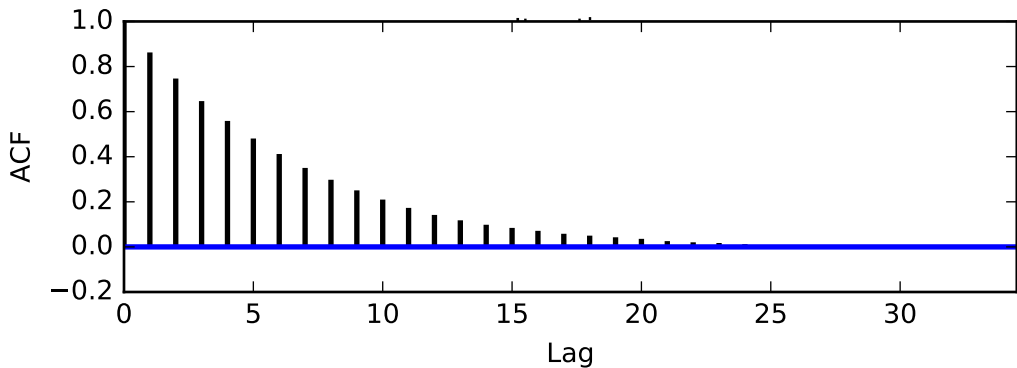

Supplement: Supplementary file 35 [file npg-2017-26-supplement.zip]

WOSA periodograms for different degrees of the trend

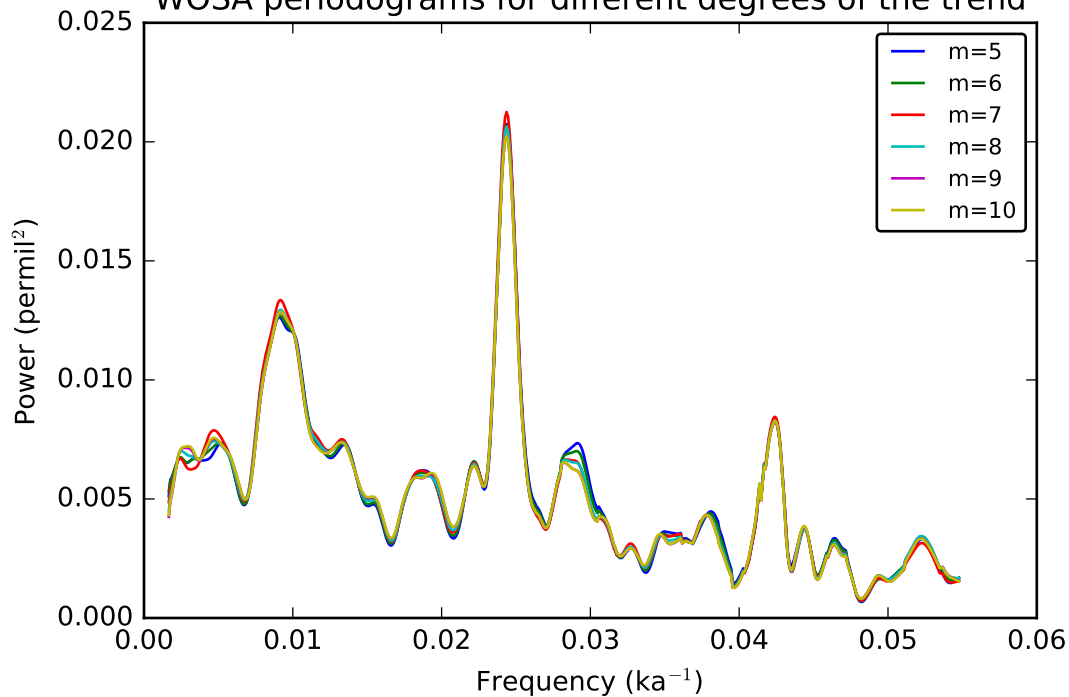

Supplement: Supplementary file 36 [file npg-2017-26-supplement.zip]

WOSA periodogram and Confidence levels

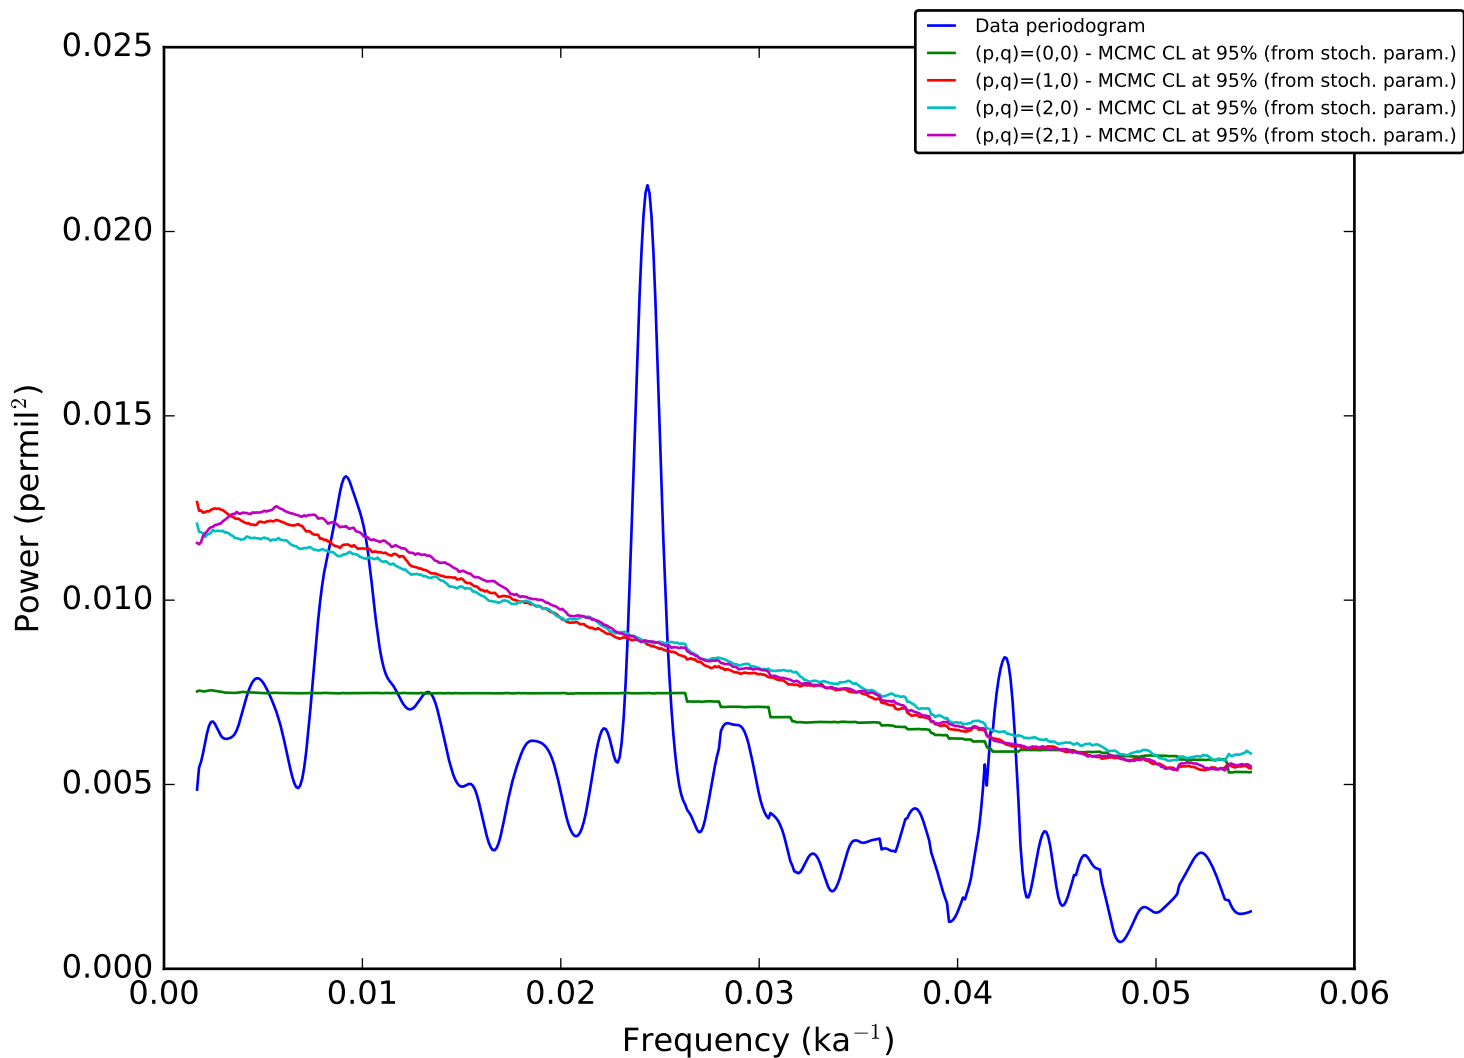

Supplement: Supplementary file 37 [file npg-2017-26-supplement.zip]

ACF of Sqrd. Resid.

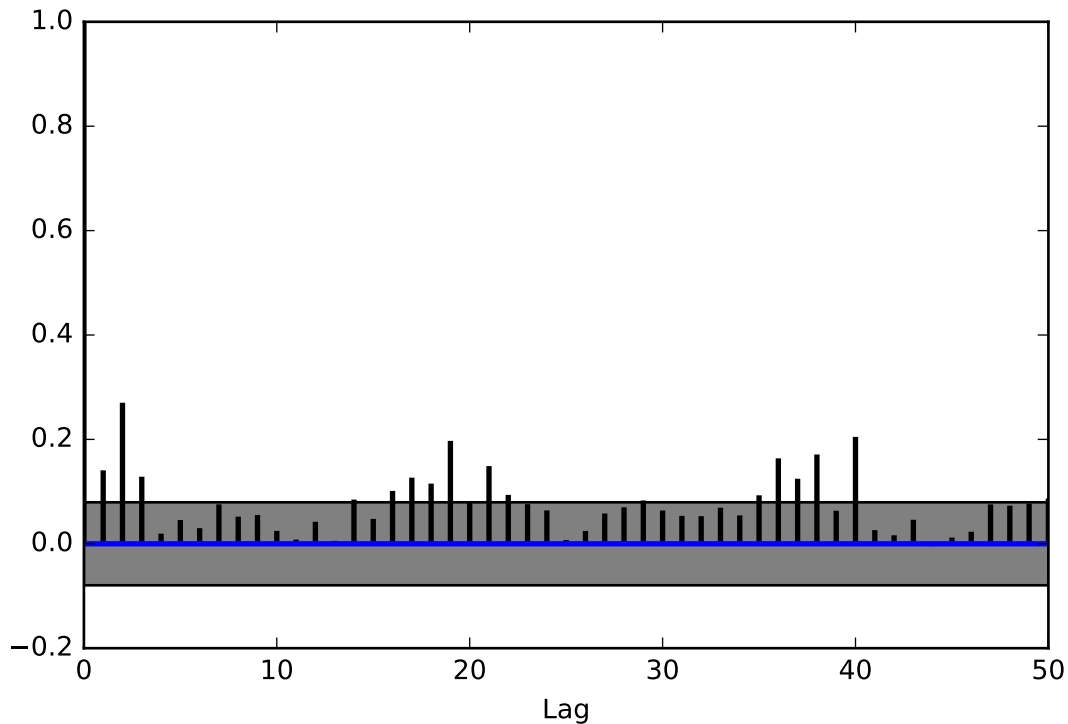

Supplement: Supplementary file 38 [file npg-2017-26-supplement.zip]

ACF of Sqrd. Resid.

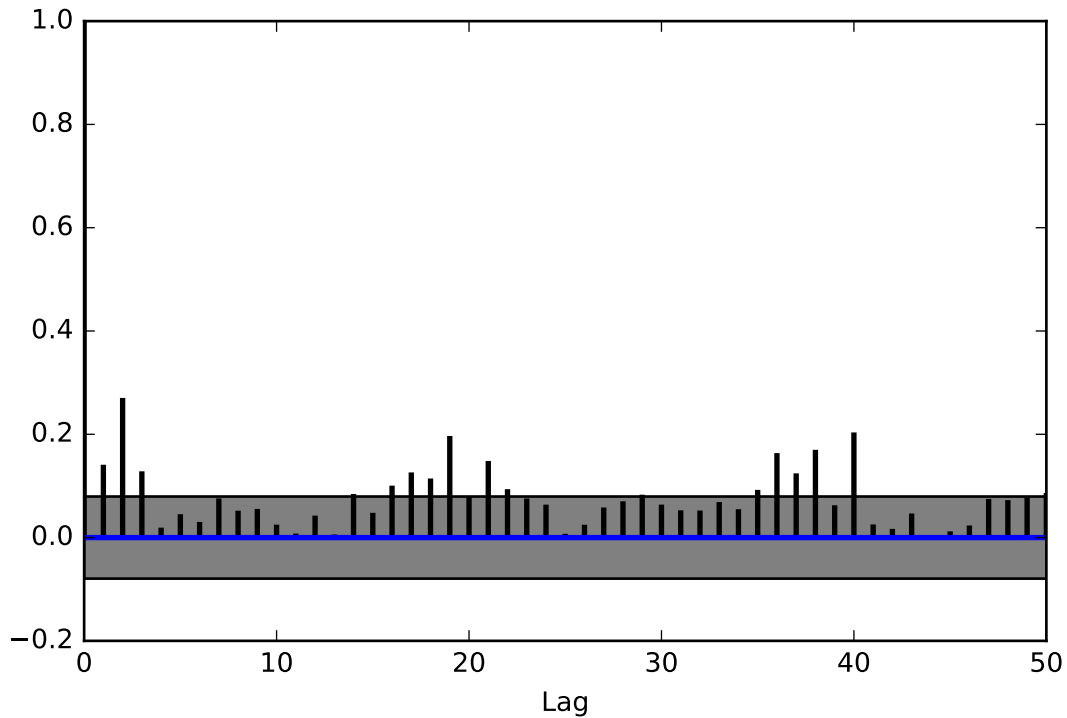

Supplement: Supplementary file 39 [file npg-2017-26-supplement.zip]

Computing times

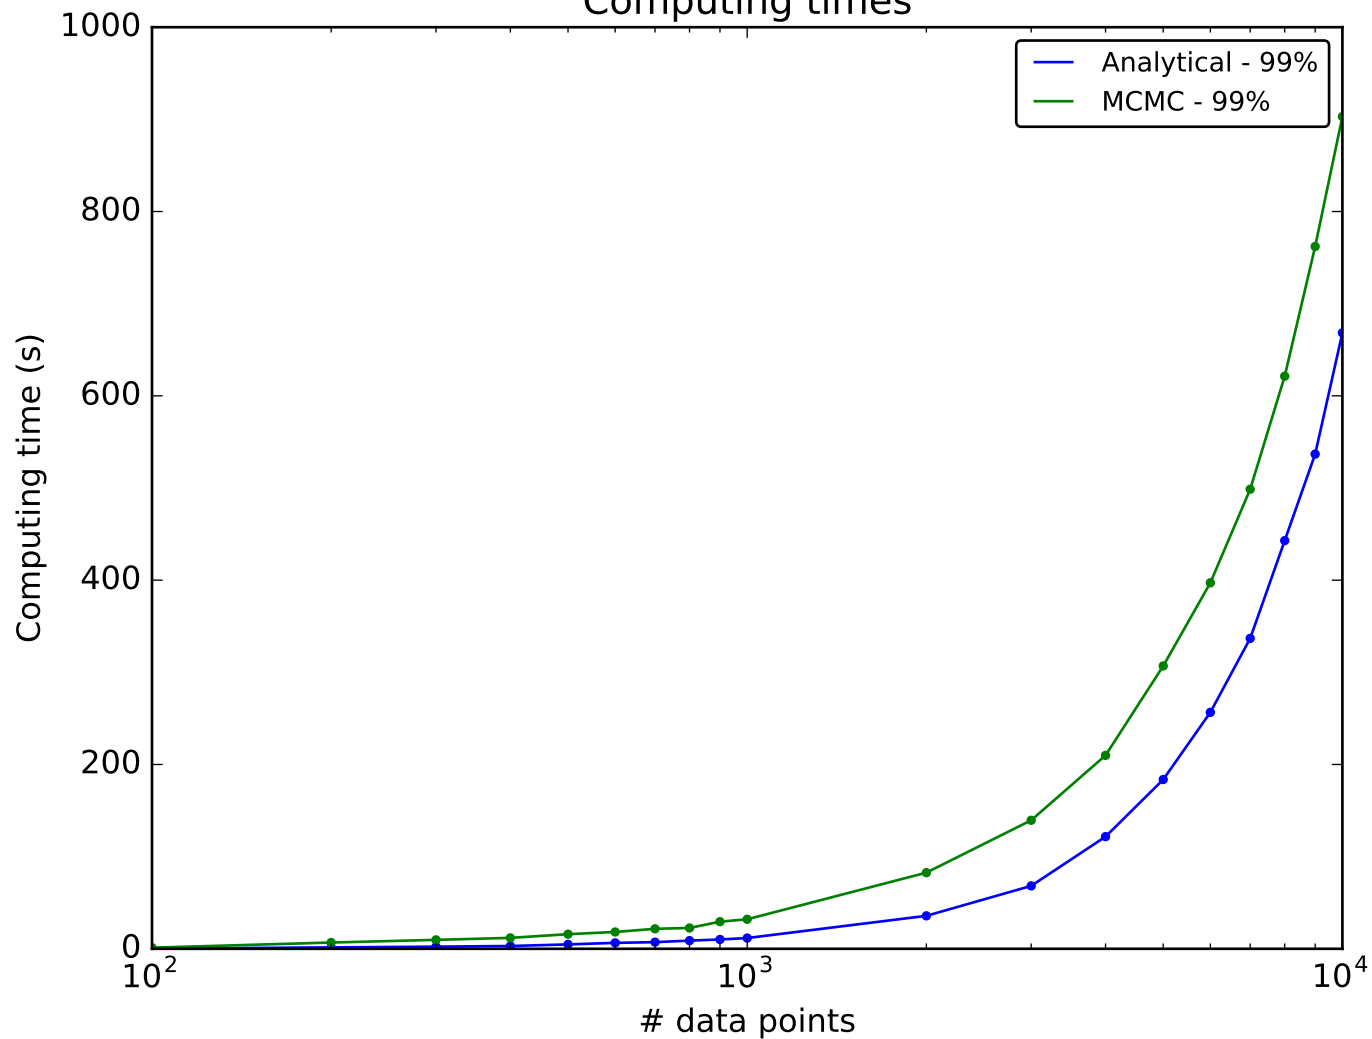

Supplement: Supplementary file 40 [file npg-2017-26-supplement.zip]

Squared amplitude vs weighted periodogram

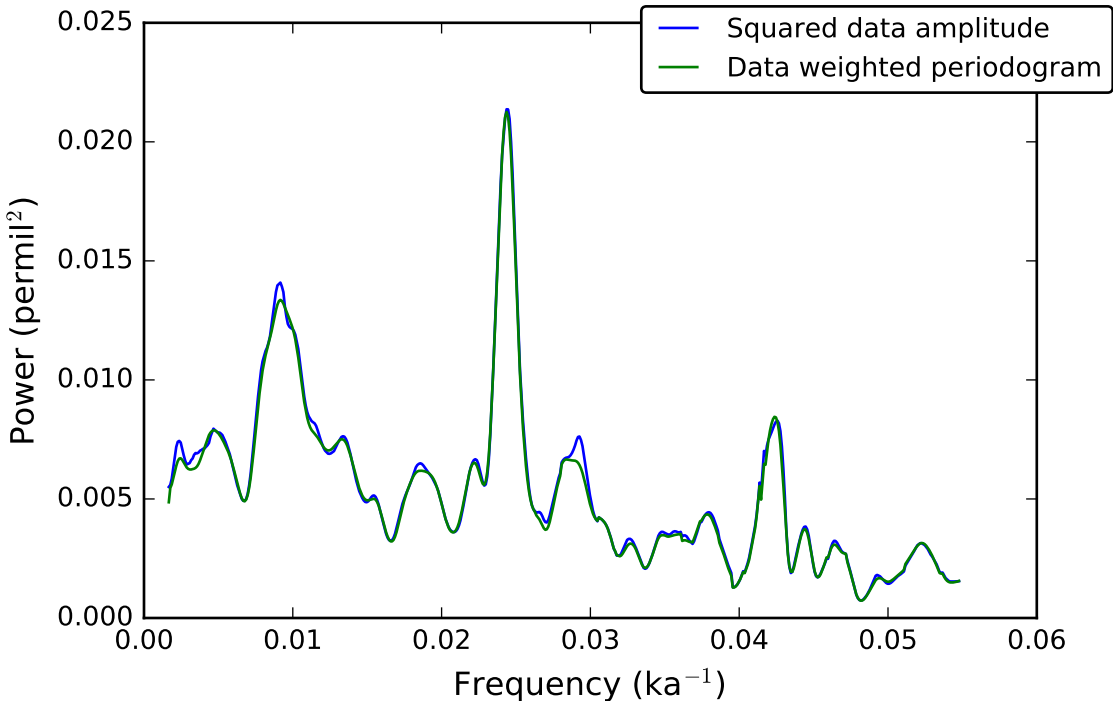

Supplement: Supplementary file 41 [file npg-2017-26-supplement.zip]

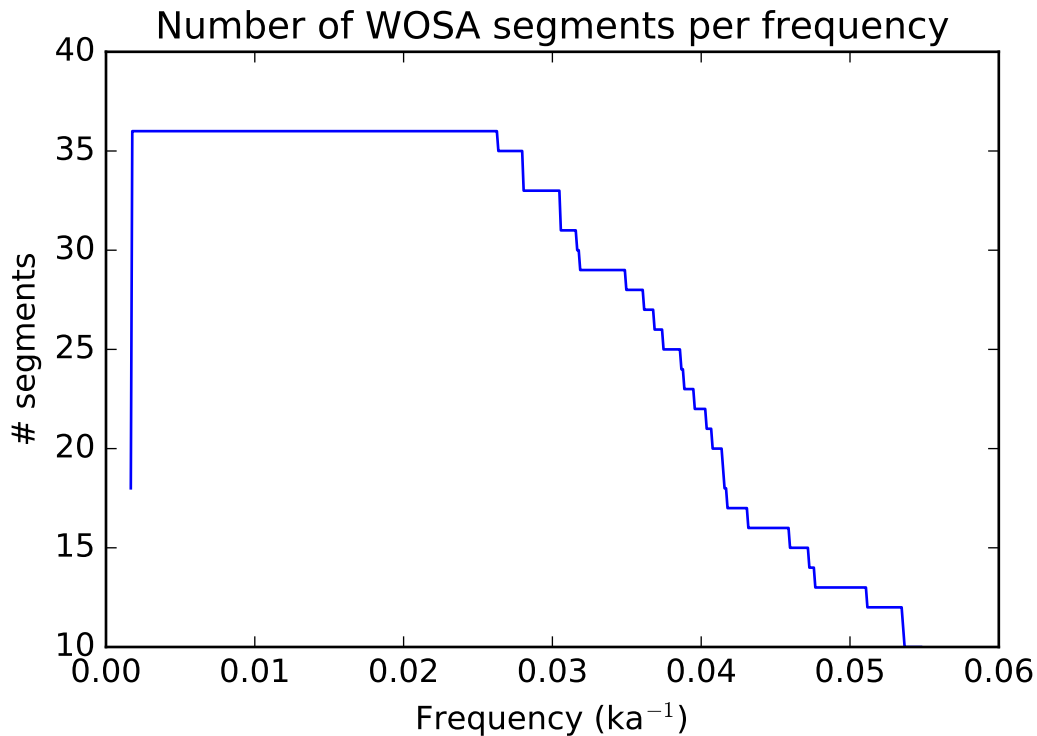

Supplement: Supplementary file 42 [file npg-2017-26-supplement.zip]

Computing times

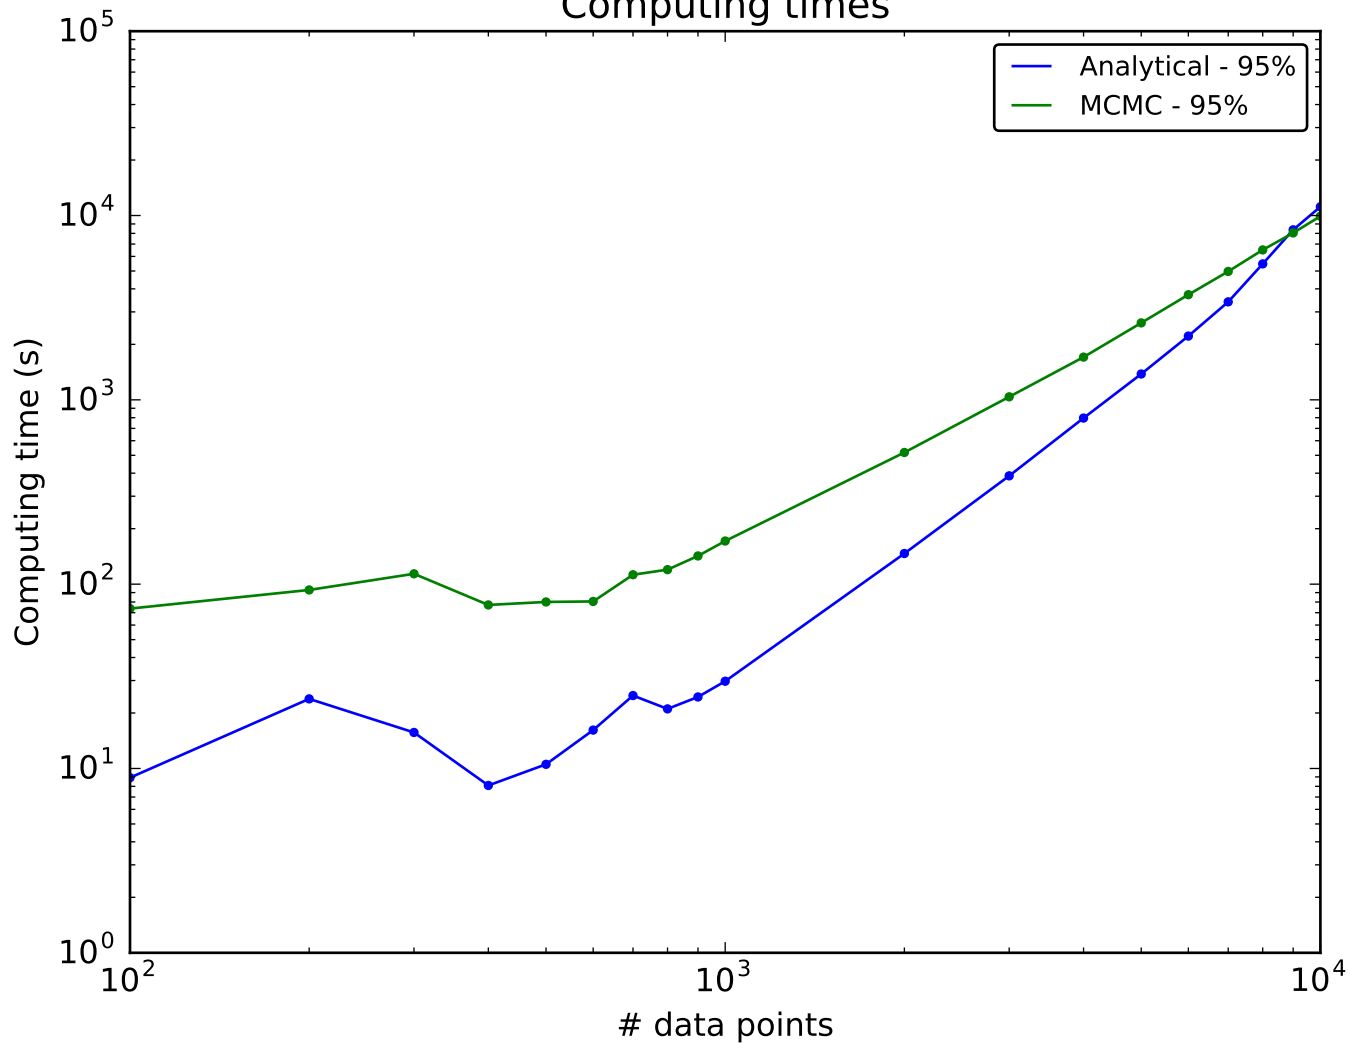

Supplement: Supplementary file 43 [file npg-2017-26-supplement.zip]

Marginal distribution of ar\_coefs[1]

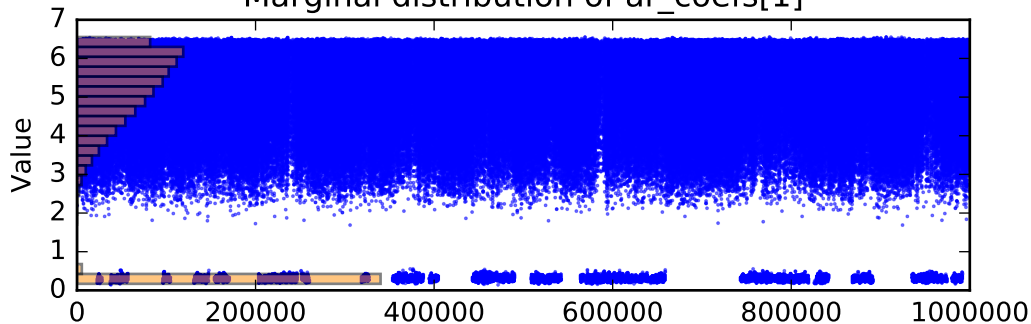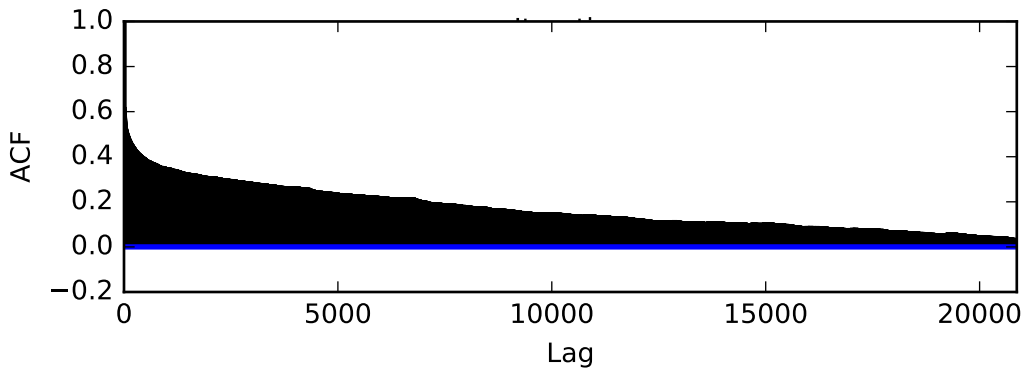

Supplement: Supplementary file 44 [file npg-2017-26-supplement.zip]

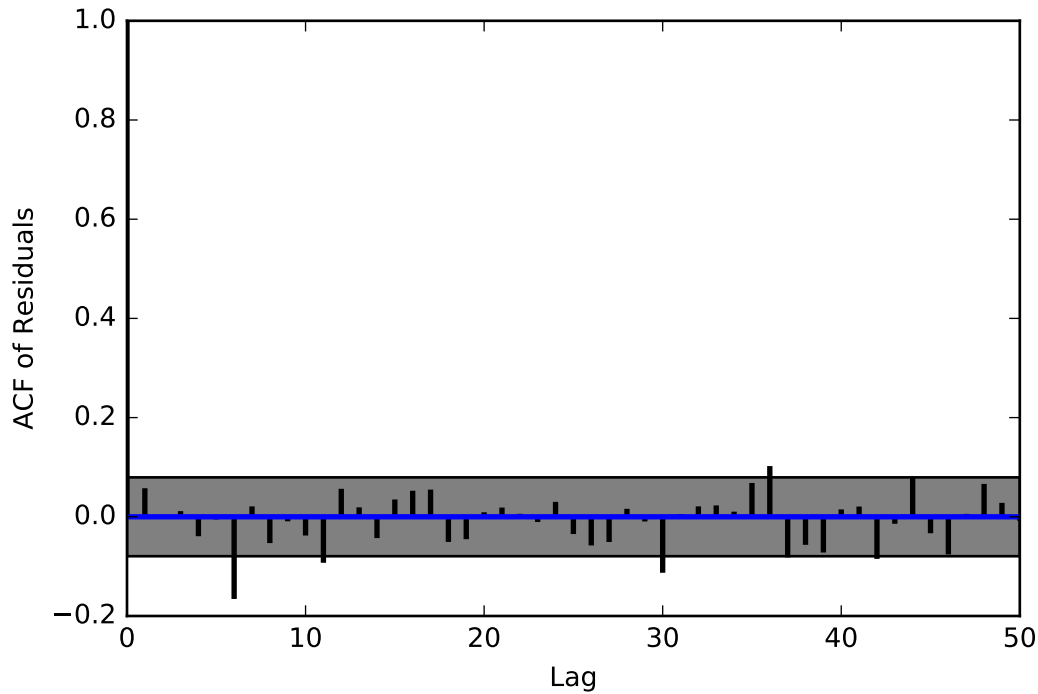

Supplement: Supplementary file 45 [file npg-2017-26-supplement.zip]

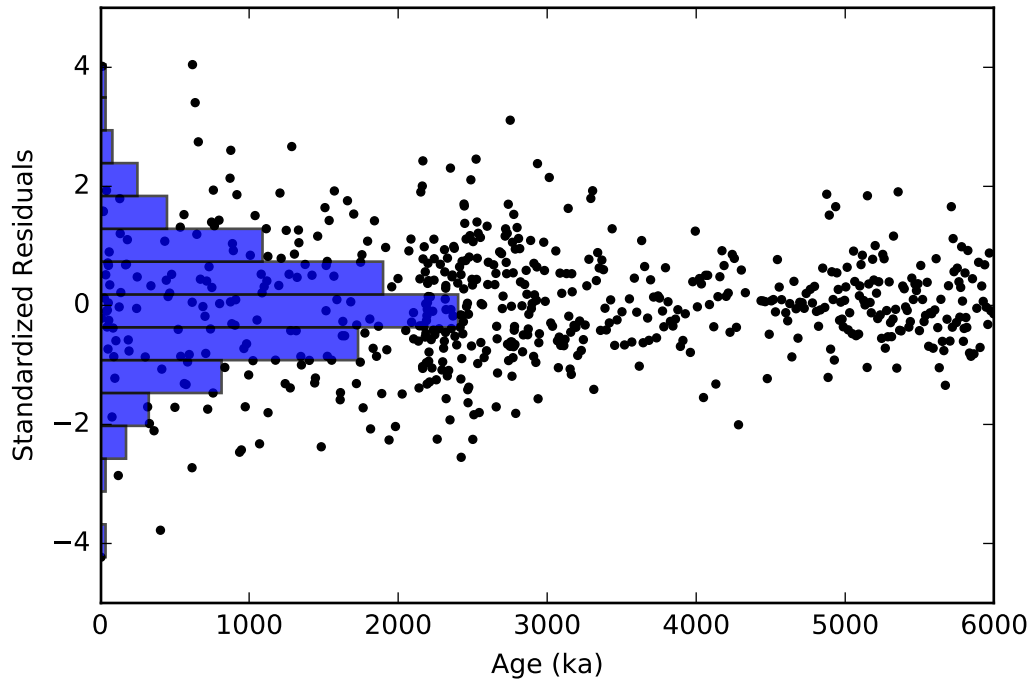

Supplement: Supplementary file 46 [file npg-2017-26-supplement.zip]

Marginal distribution of  $\log(\alpha)$

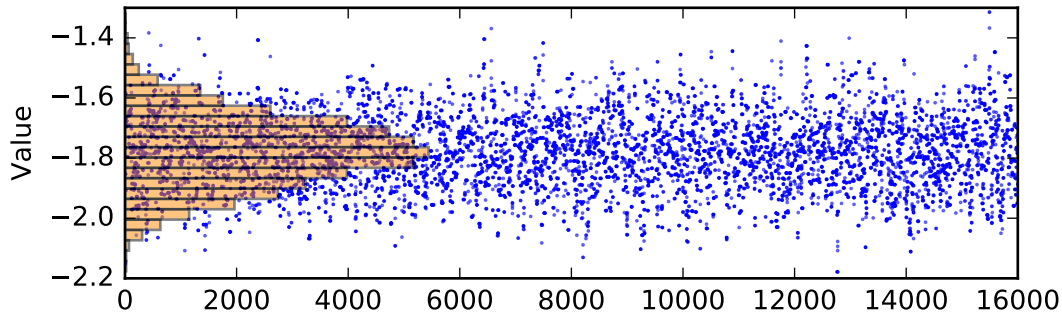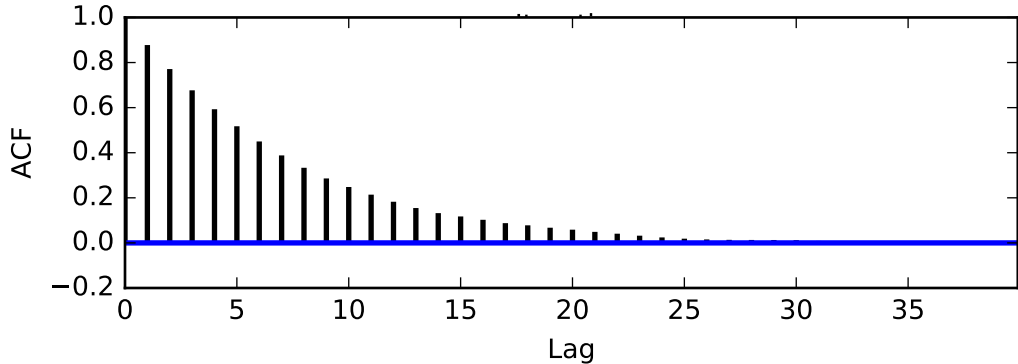

Supplement: Supplementary file 47 [file npg-2017-26-supplement.zip]

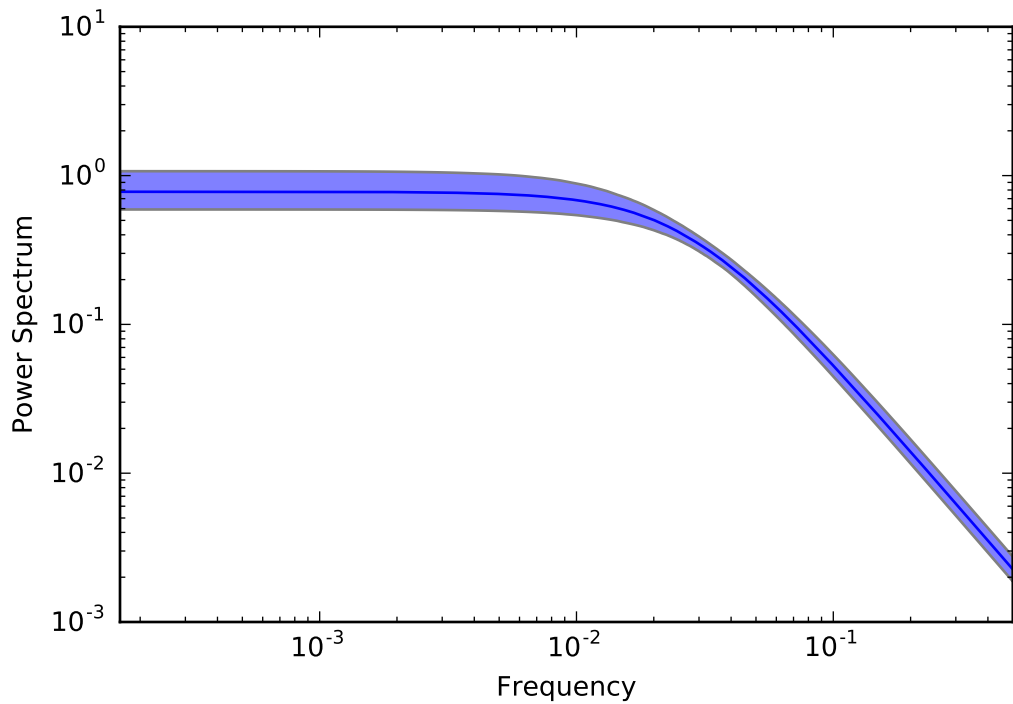

Supplement: Supplementary file 48 [file npg-2017-26-supplement.zip]

Marginal distribution of ar\_coefs[2]

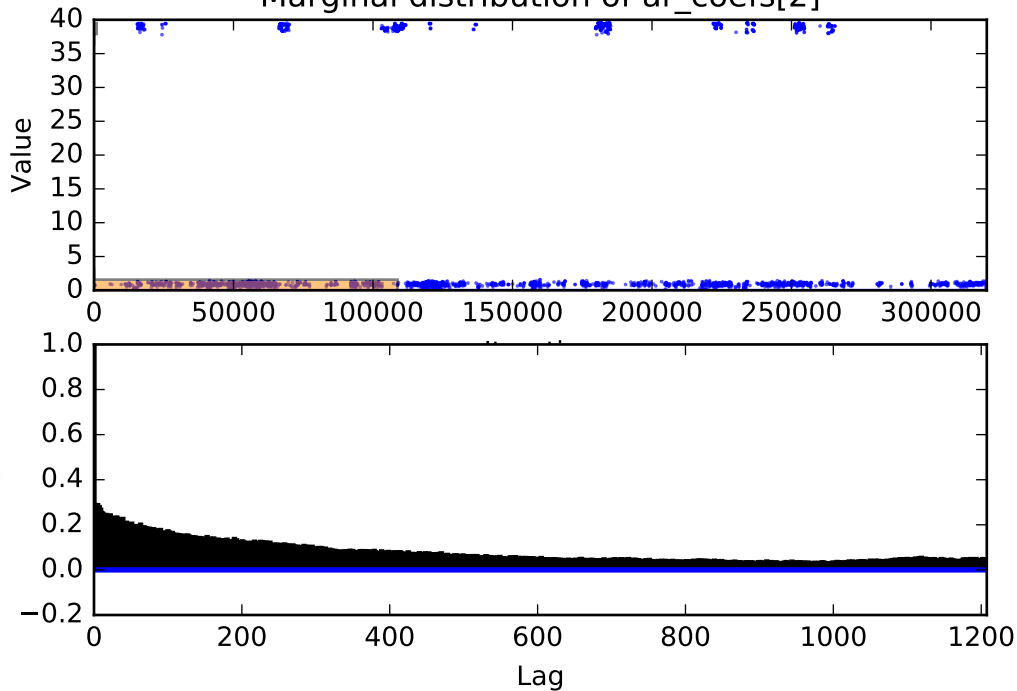

Supplement: Supplementary file 49 [file npg-2017-26-supplement.zip]

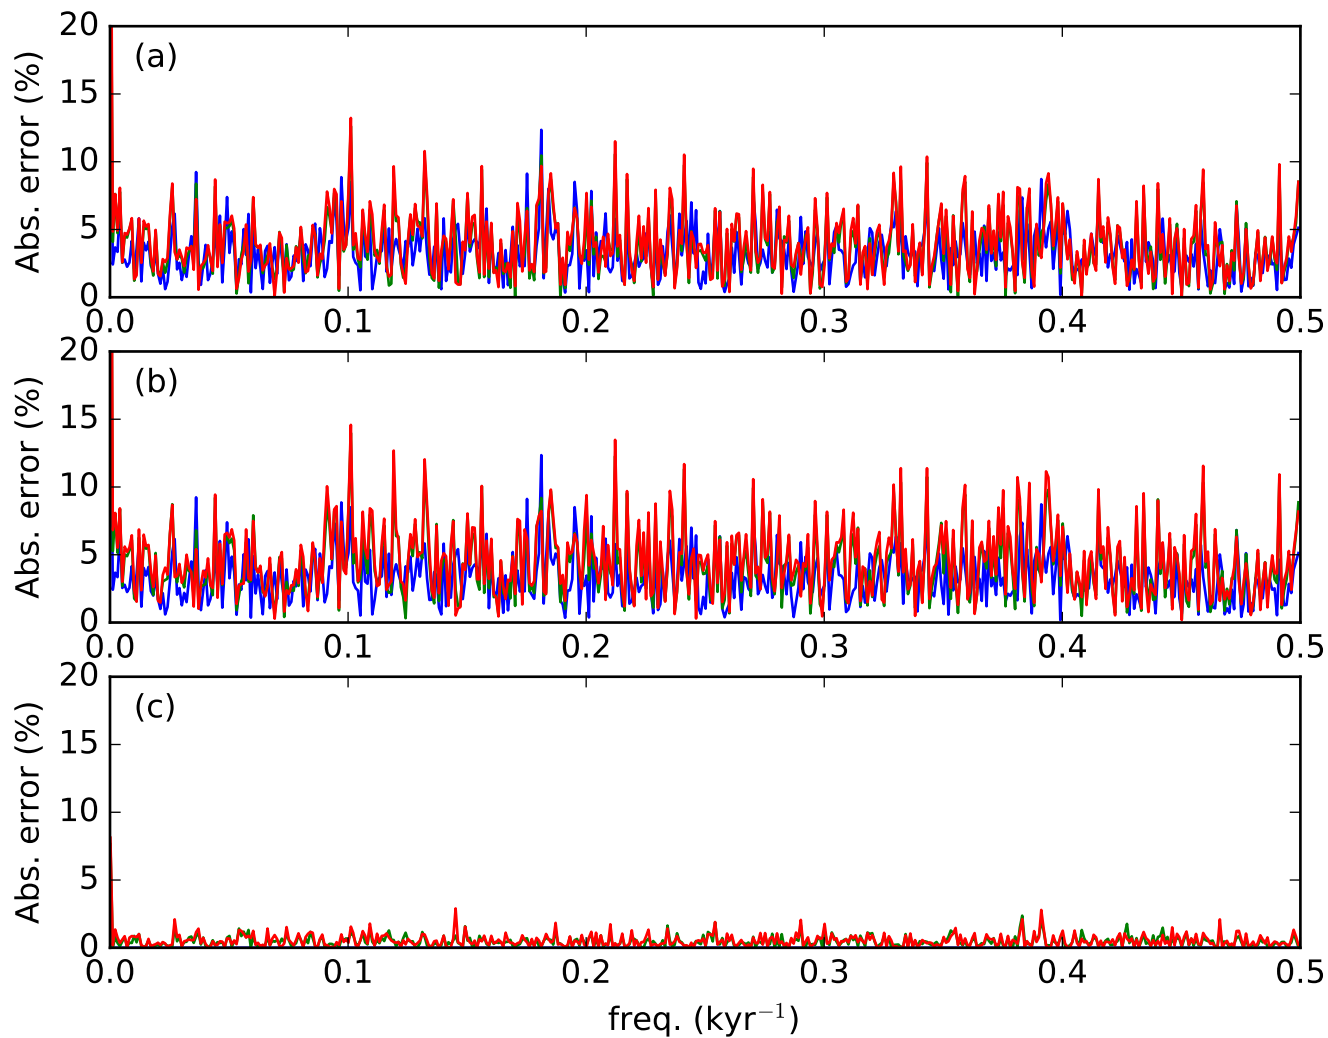

Supplement: Supplementary file 50 [file npg-2017-26-supplement.zip › supplementary_material/figures/approx_Lomb_generalized.pdf]

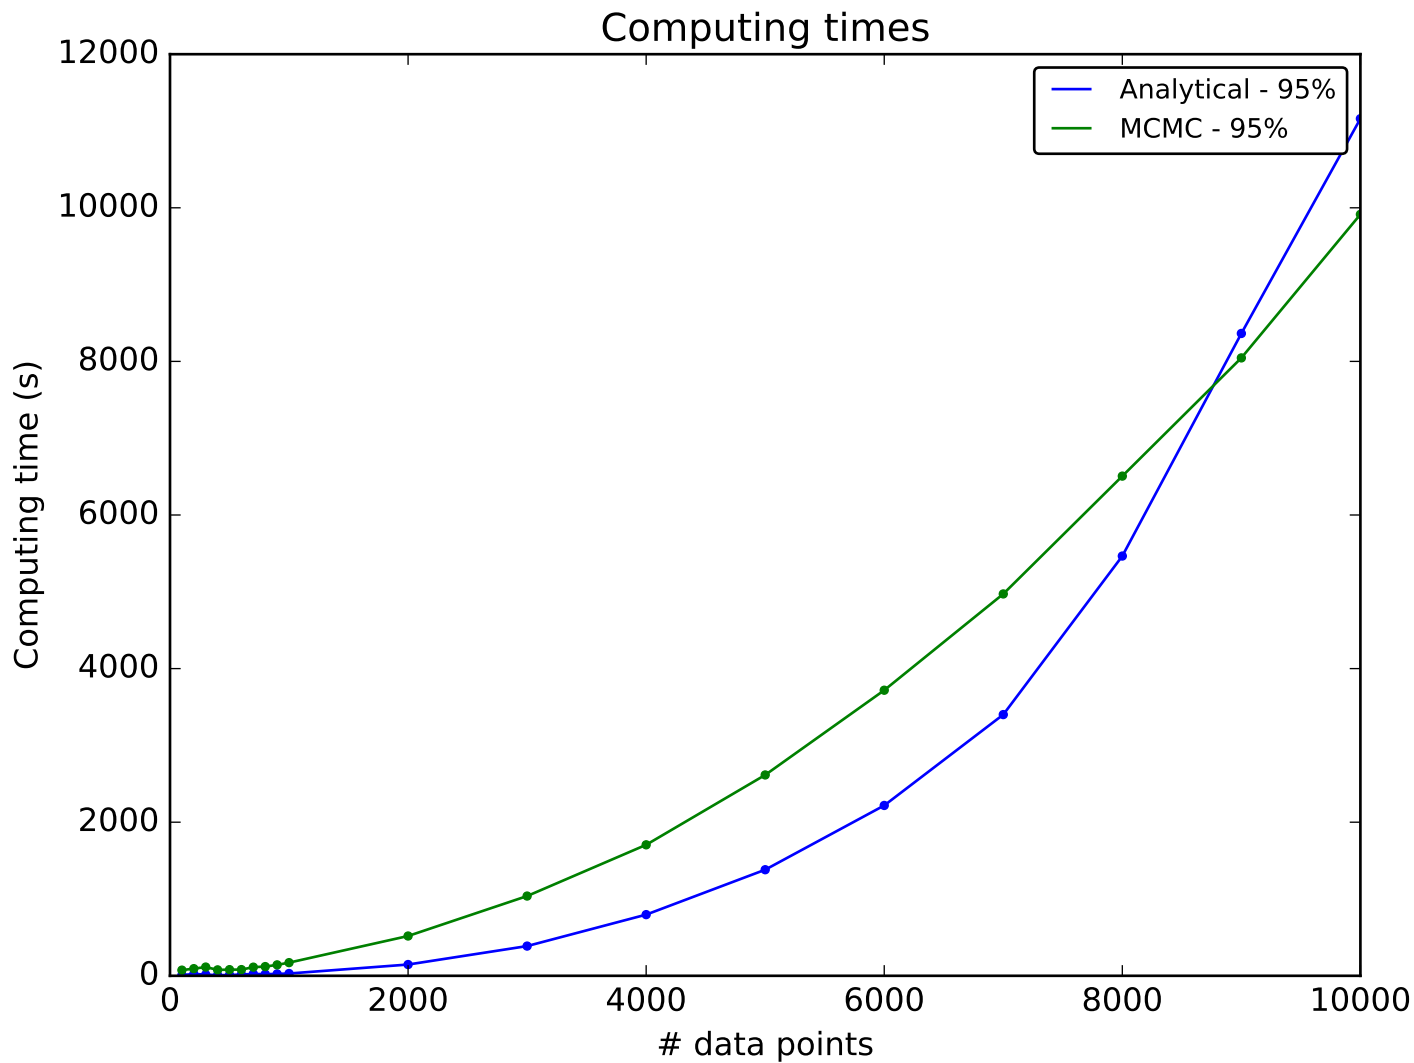

Supplement: Supplementary file 50 [file npg-2017-26-supplement.zip › supplementary_material/figures/CPU/CPU_rn_95_normal.pdf]

Computing times

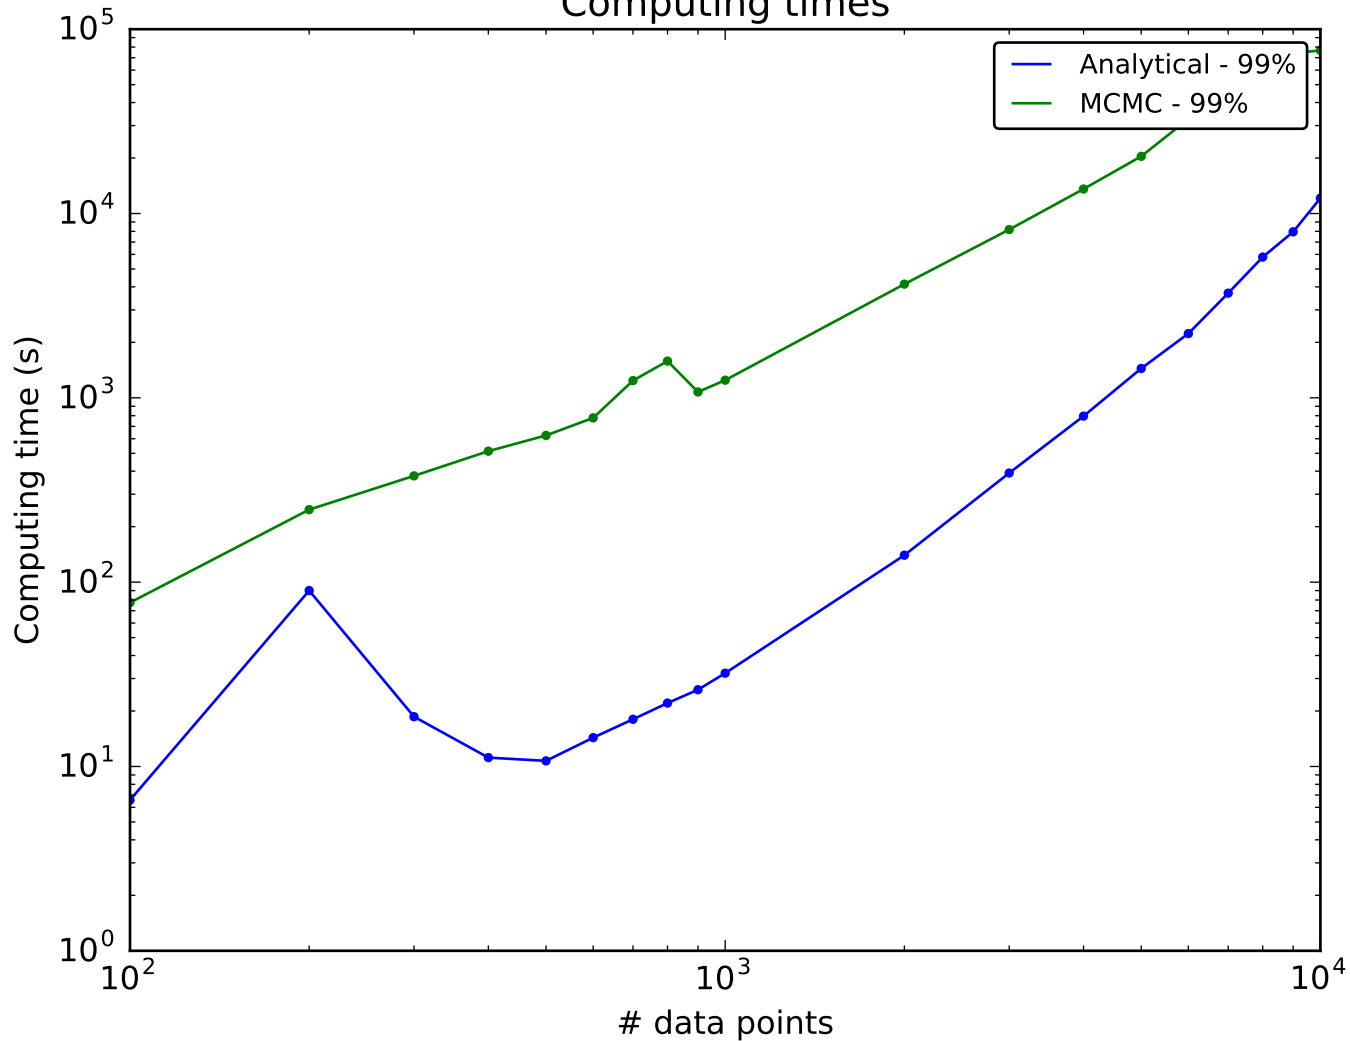

Supplement: Supplementary file 50 [file npg-2017-26-supplement.zip › supplementary_material/figures/CPU/CPU_rn_99_loglog.pdf]

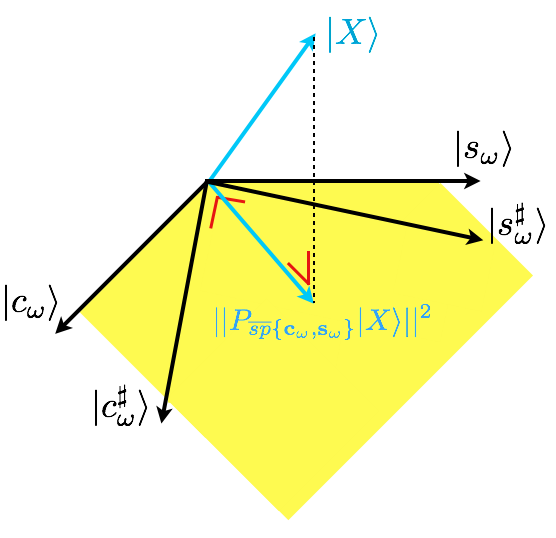

Supplement: Supplementary file 50 [file npg-2017-26-supplement.zip › supplementary_material/figures/LS_projection.png]

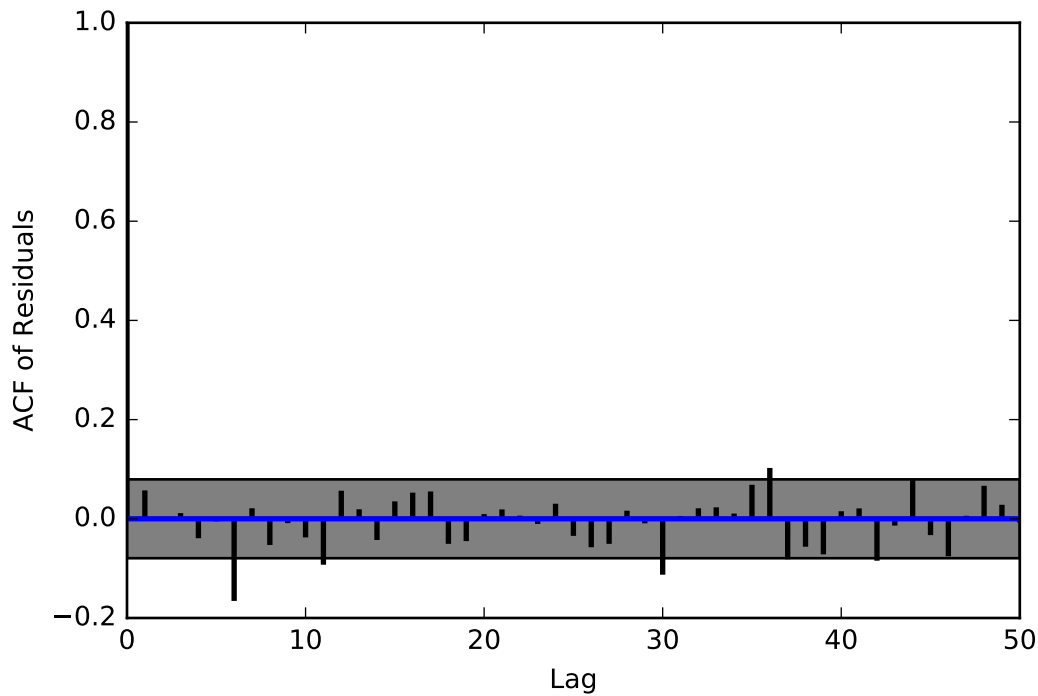

Supplement: Supplementary file 50 [file npg-2017-26-supplement.zip › supplementary_material/figures/ODP1148_example/carma_analytic/assess_fit3.pdf]

Marginal distribution of  $\mu$

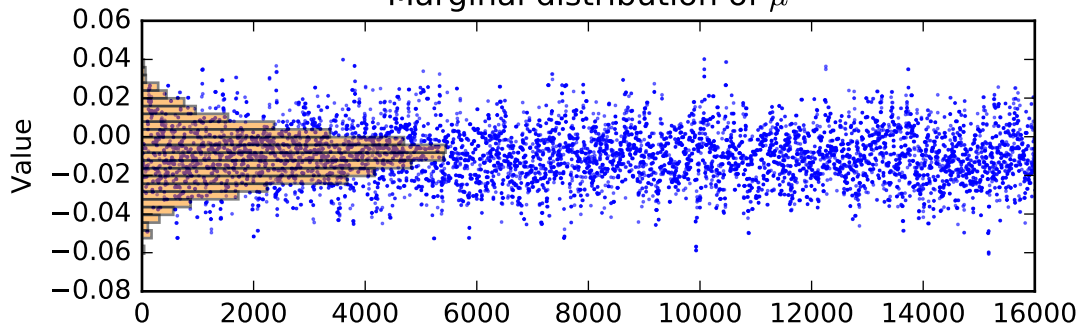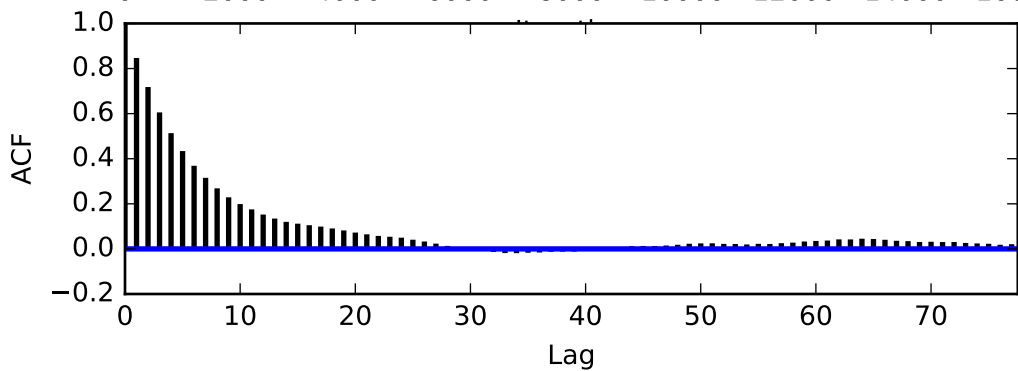

Supplement: Supplementary file 50 [file npg-2017-26-supplement.zip › supplementary_material/figures/ODP1148_example/carma_analytic/mu.pdf]

# Convergence of the analytical percentiles

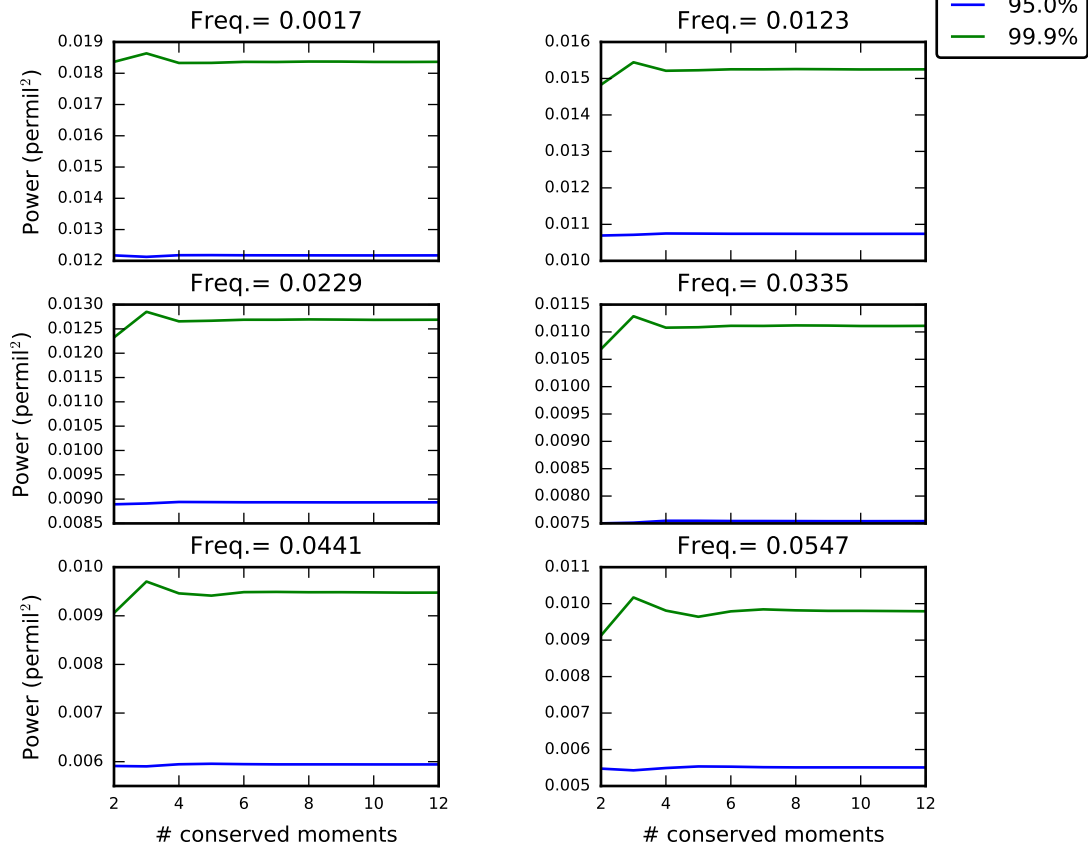

Supplement: Supplementary file 50 [file npg-2017-26-supplement.zip › supplementary_material/figures/ODP1148_example/check_convergence_percentiles.pdf]

Data and trend

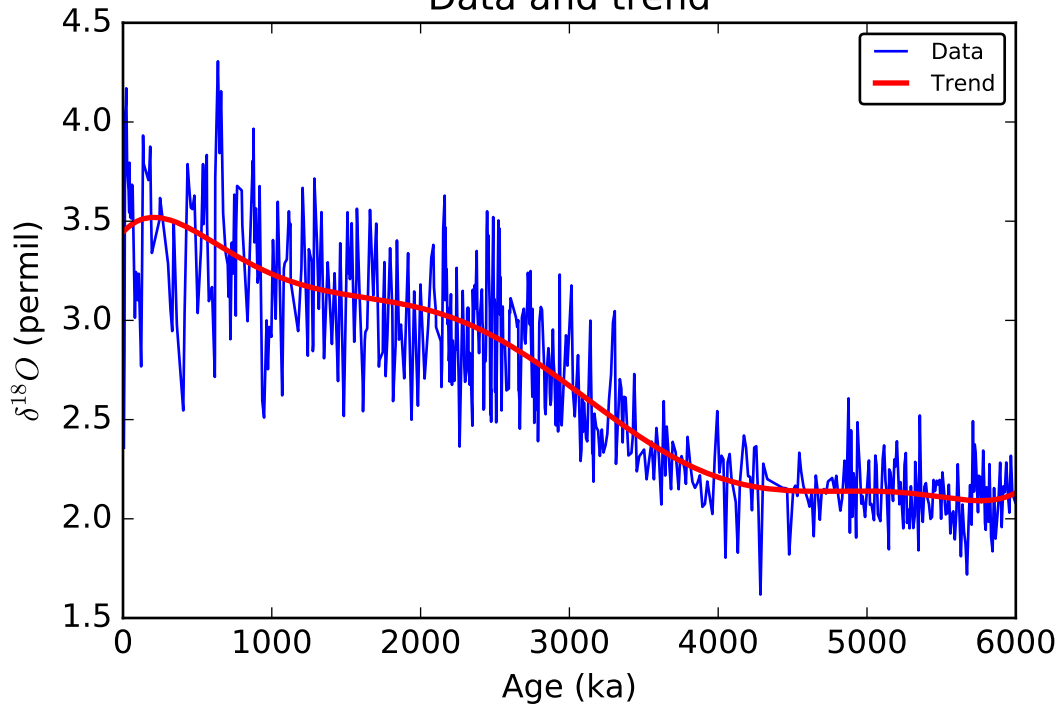

Supplement: Supplementary file 50 [file npg-2017-26-supplement.zip › supplementary_material/figures/ODP1148_example/data_and_trend.pdf]

# WOSA periodogram and confidence levels

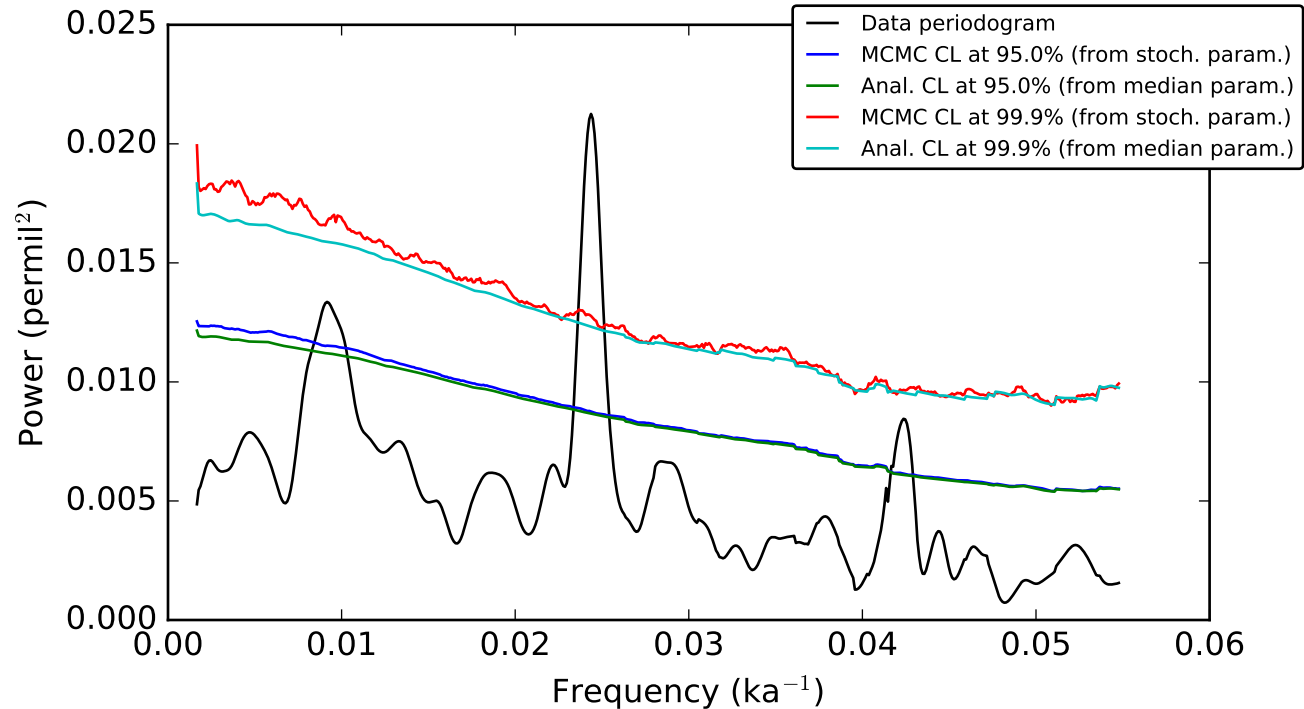

Supplement: Supplementary file 50 [file npg-2017-26-supplement.zip › supplementary_material/figures/ODP1148_example/periodogram_distr_params.pdf]

# WOSA periodogram and confidence levels

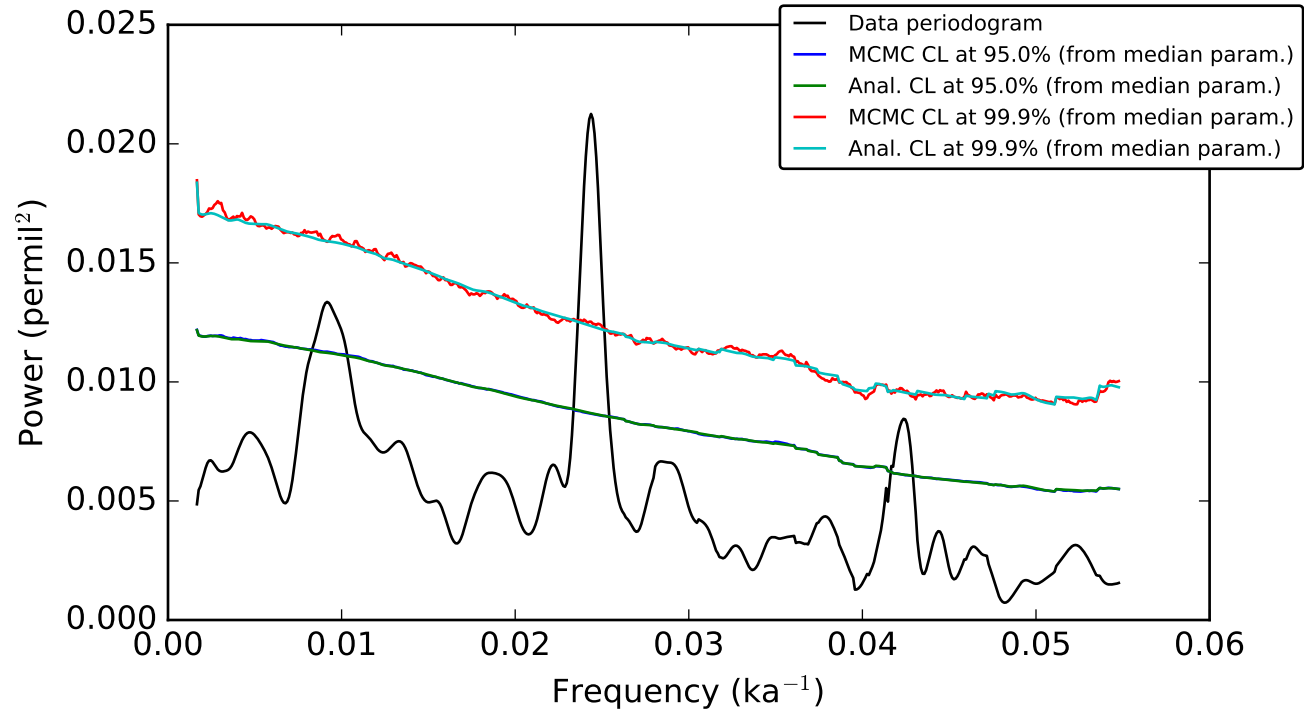

Supplement: Supplementary file 50 [file npg-2017-26-supplement.zip › supplementary_material/figures/ODP1148_example/periodogram_median_params.pdf]

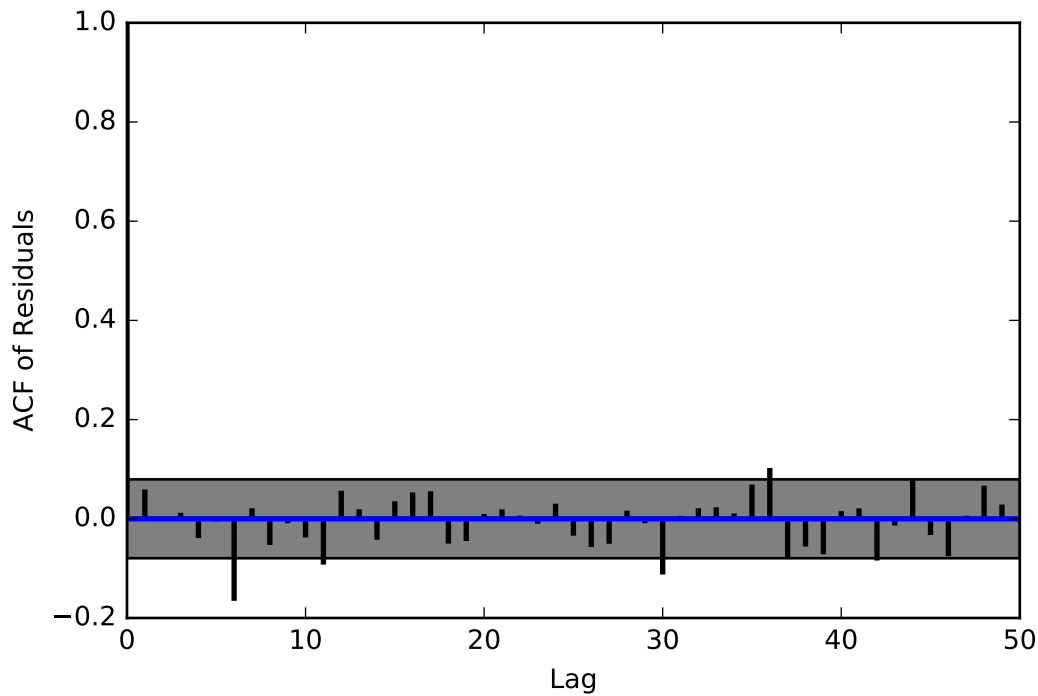

Supplement: Supplementary file 50 [file npg-2017-26-supplement.zip › supplementary_material/figures/ODP1148_example/sensitivity_order_carma/carma20/assess_fit3.pdf]

ACF of Sqrd. Resid.

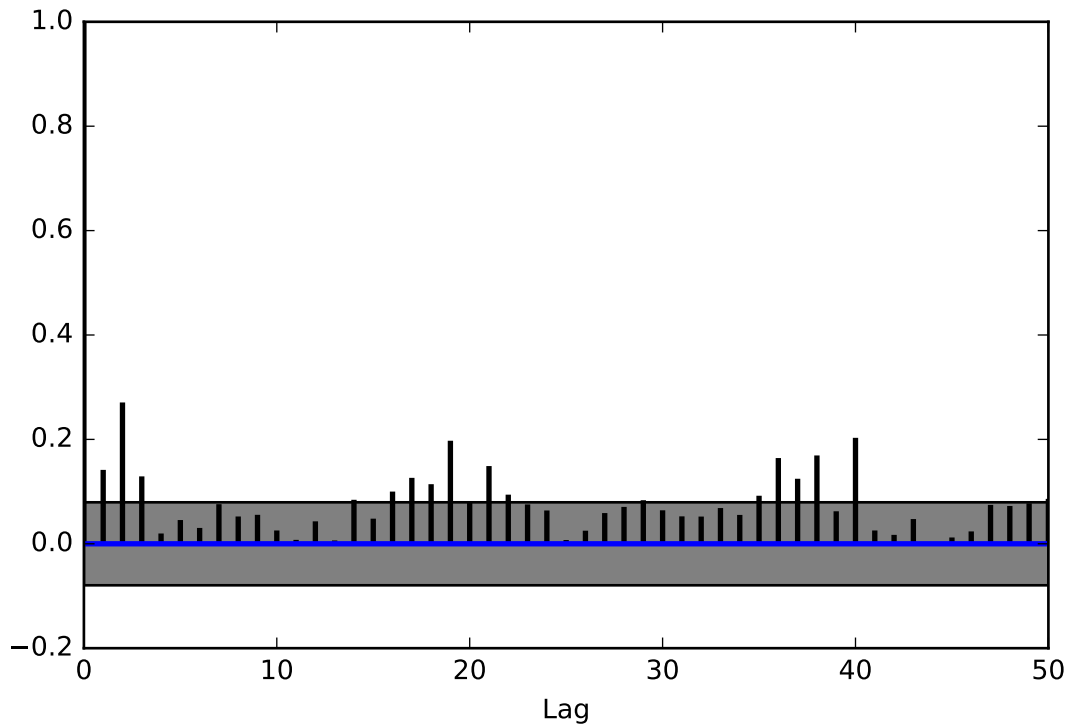

Supplement: Supplementary file 50 [file npg-2017-26-supplement.zip › supplementary_material/figures/ODP1148_example/sensitivity_order_carma/carma20/assess_fit4.pdf]

Marginal distribution of the process variance

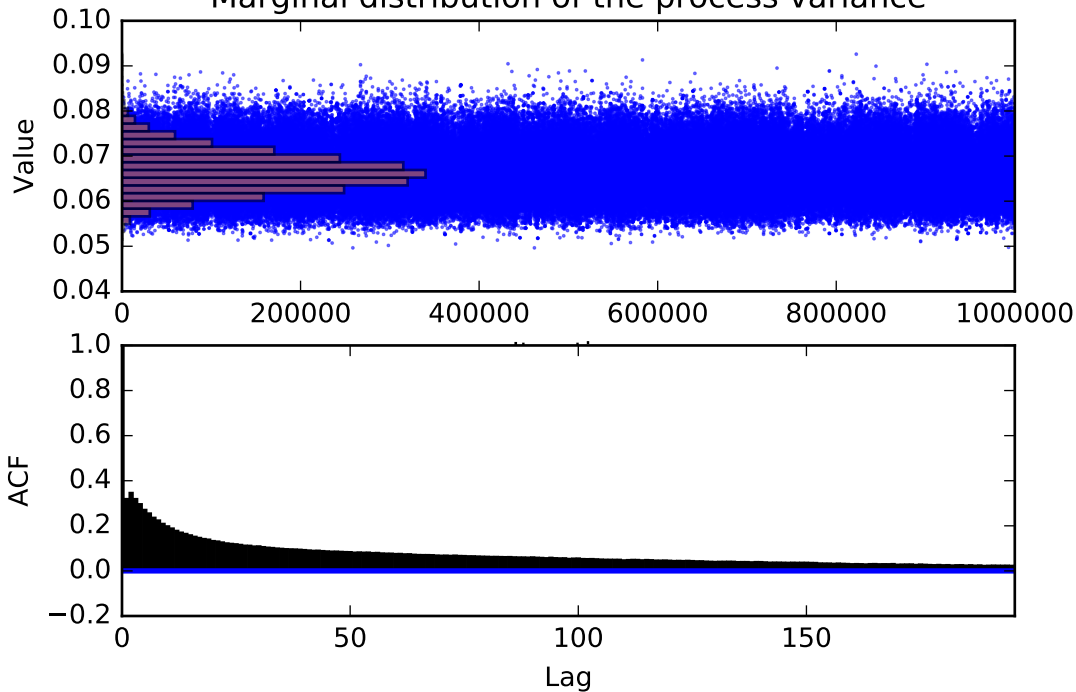

Supplement: Supplementary file 50 [file npg-2017-26-supplement.zip › supplementary_material/figures/ODP1148_example/sensitivity_order_carma/carma20/var.pdf]

Marginal distribution of ar\_coefs[1]

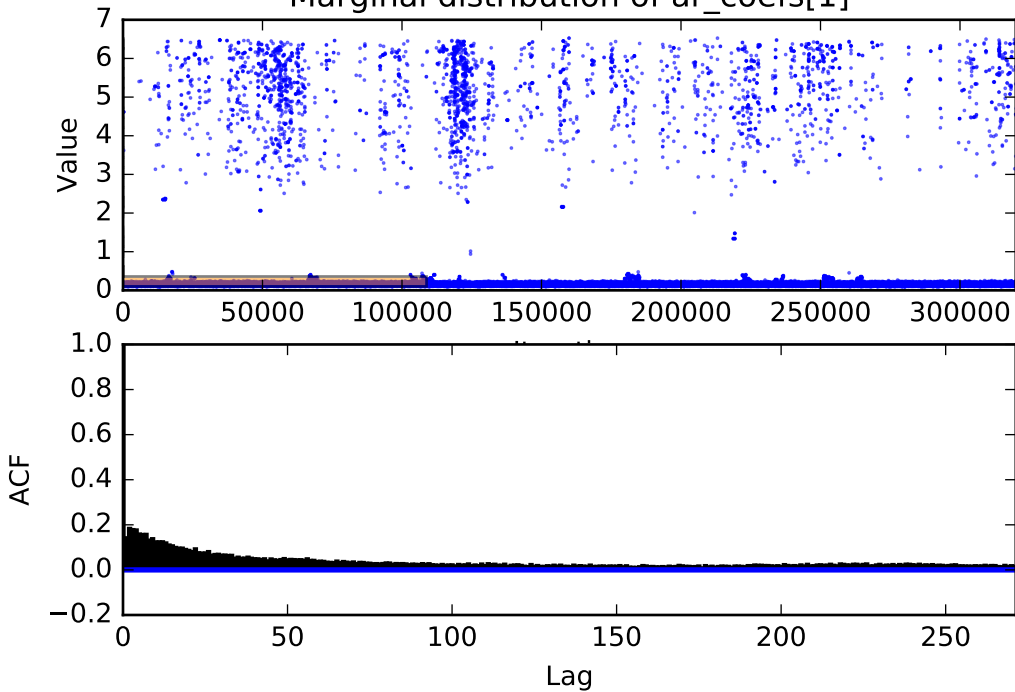

Supplement: Supplementary file 50 [file npg-2017-26-supplement.zip › supplementary_material/figures/ODP1148_example/sensitivity_order_carma/carma21/ar_coefs_1.pdf]

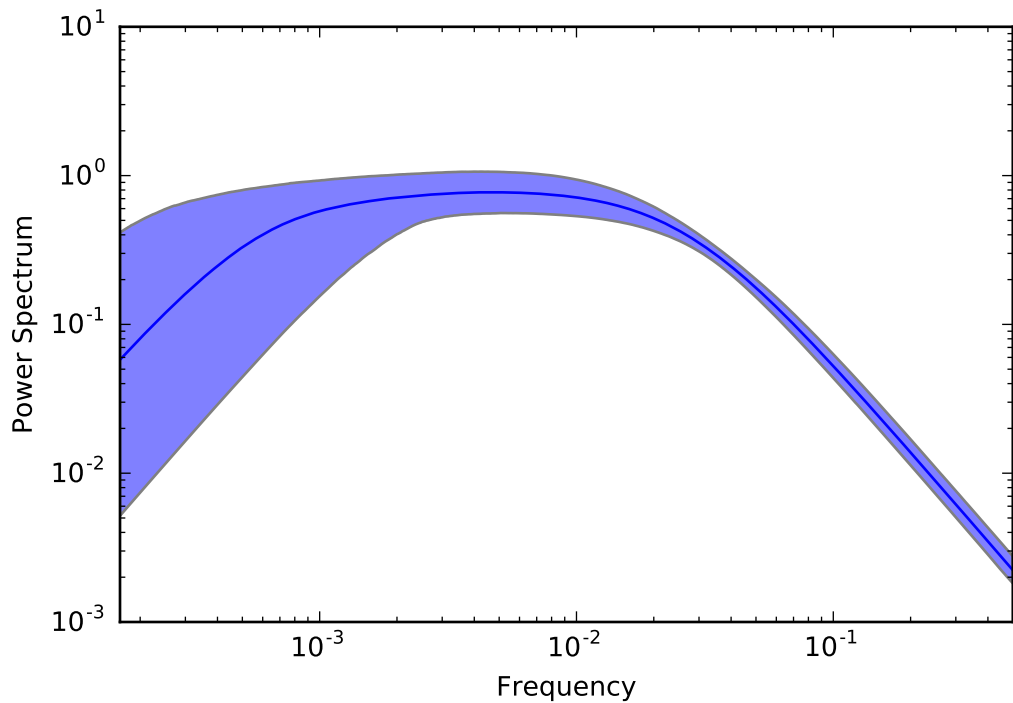

Supplement: Supplementary file 50 [file npg-2017-26-supplement.zip › supplementary_material/figures/ODP1148_example/sensitivity_order_carma/carma21/carma_spectrum.pdf]

Marginal distribution of  $\mu$

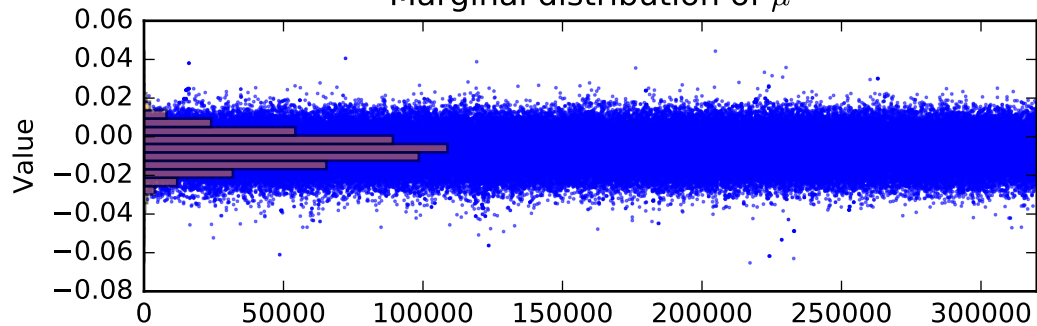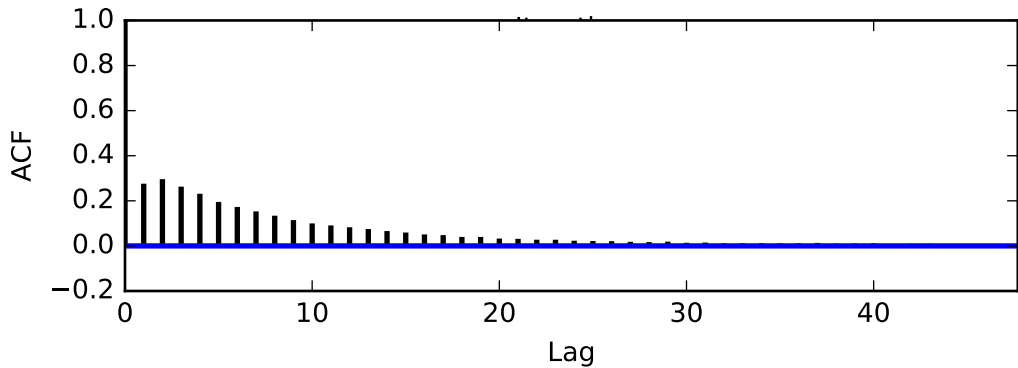

Supplement: Supplementary file 50 [file npg-2017-26-supplement.zip › supplementary_material/figures/ODP1148_example/sensitivity_order_carma/carma21/mu.pdf]

Marginal distribution of  $\sigma$

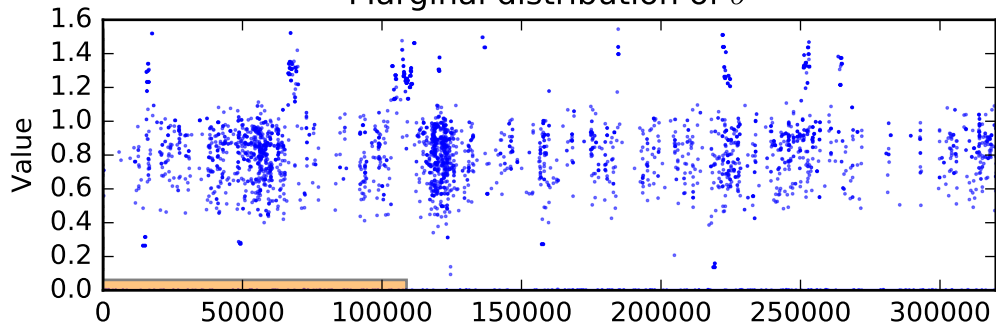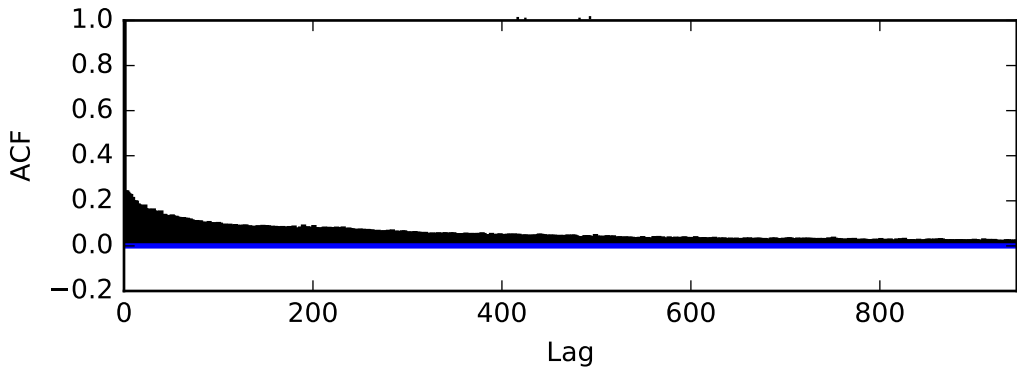

Supplement: Supplementary file 50 [file npg-2017-26-supplement.zip › supplementary_material/figures/ODP1148_example/sensitivity_order_carma/carma21/sigma.pdf]

Marginal distribution of the process variance

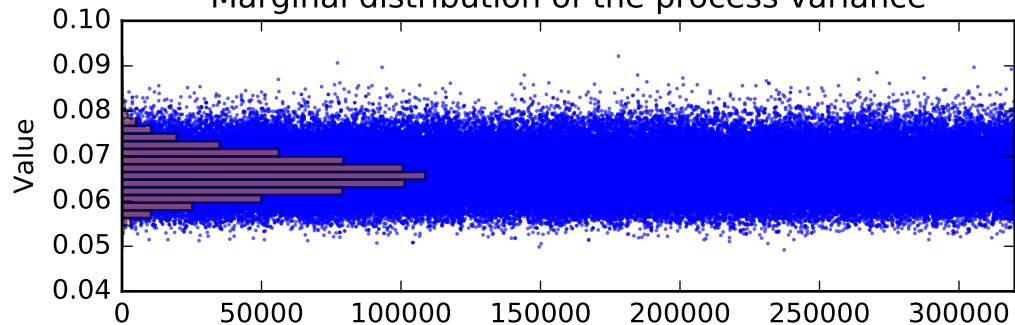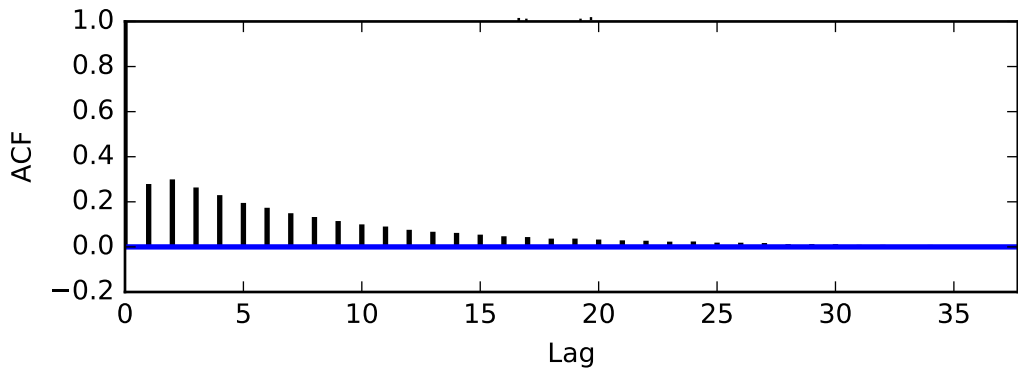

Supplement: Supplementary file 50 [file npg-2017-26-supplement.zip › supplementary_material/figures/ODP1148_example/sensitivity_order_carma/carma21/var.pdf]

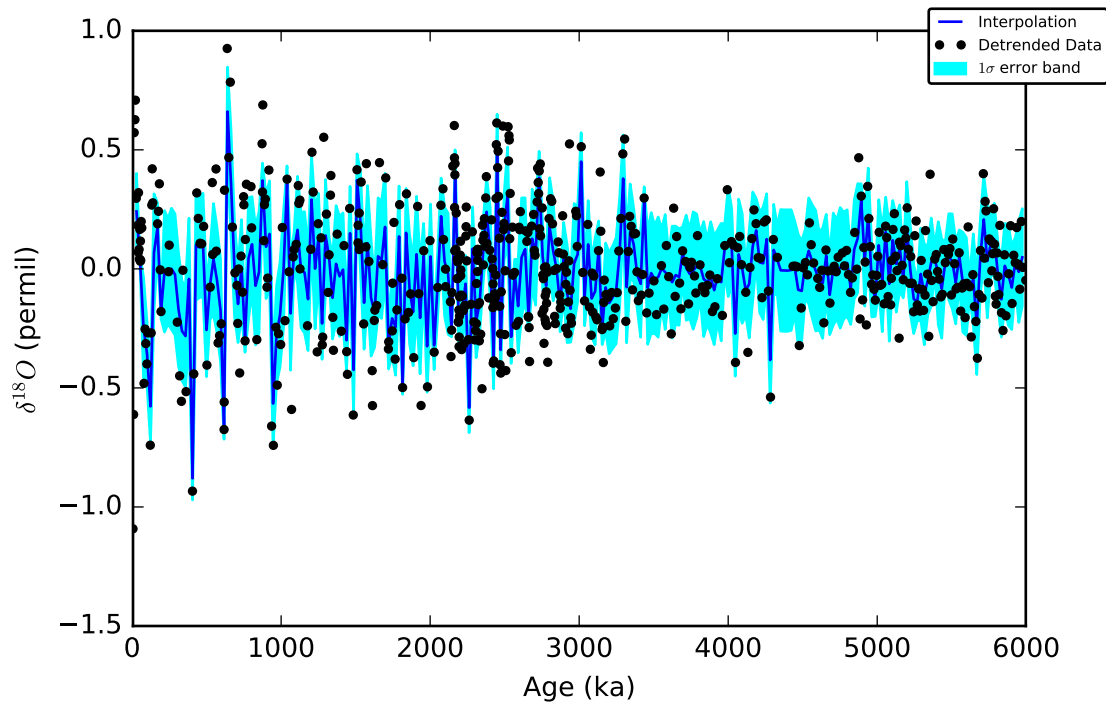

Supplement: Supplementary file 50 [file npg-2017-26-supplement.zip › supplementary_material/figures/ODP1148_example/sensitivity_order_carma/rn/assess_fit1.pdf]

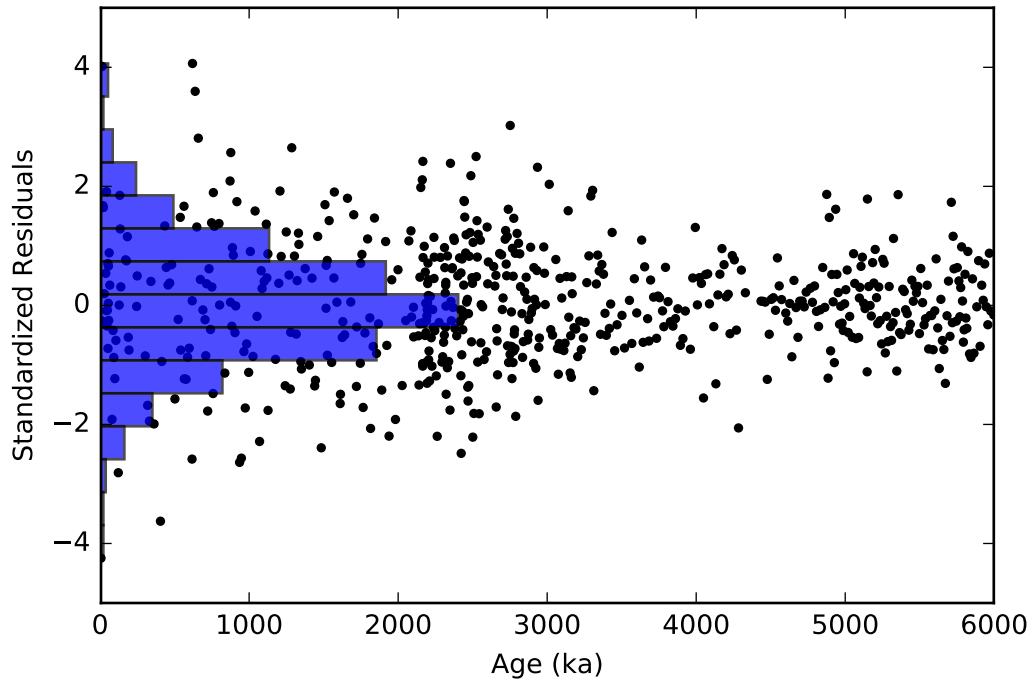

Supplement: Supplementary file 50 [file npg-2017-26-supplement.zip › supplementary_material/figures/ODP1148_example/sensitivity_order_carma/rn/assess_fit2.pdf]

Marginal distribution of  $\mu$

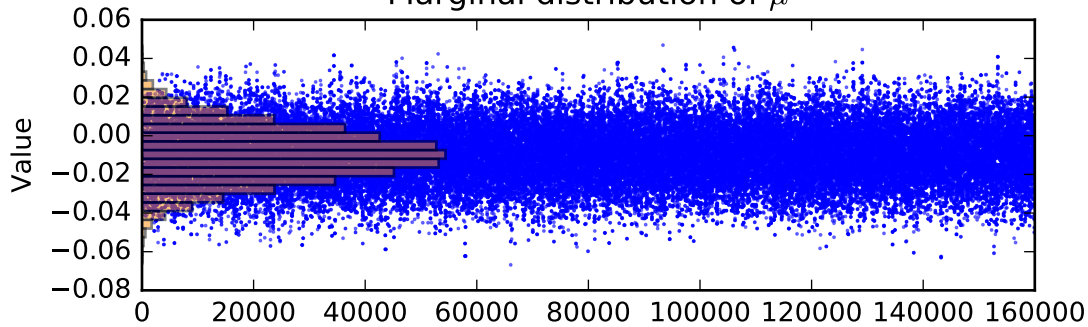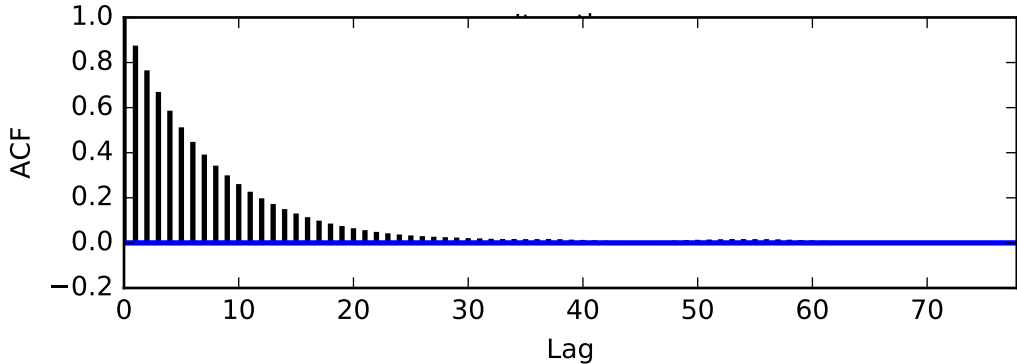

Supplement: Supplementary file 50 [file npg-2017-26-supplement.zip › supplementary_material/figures/ODP1148_example/sensitivity_order_carma/rn/mu.pdf]

Marginal distribution of  $\sigma$

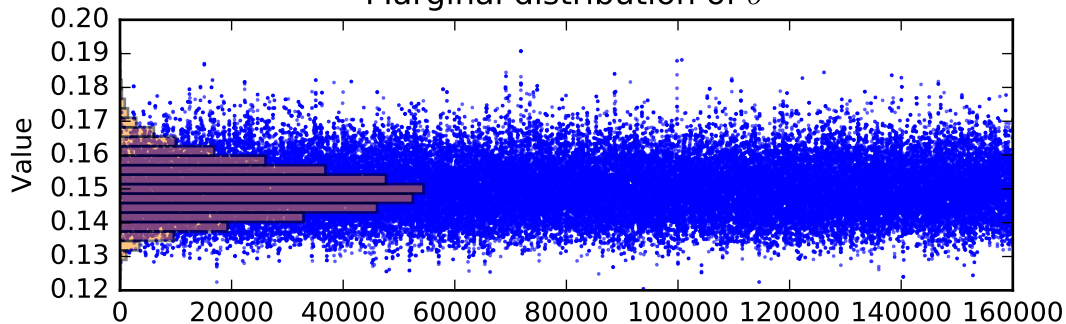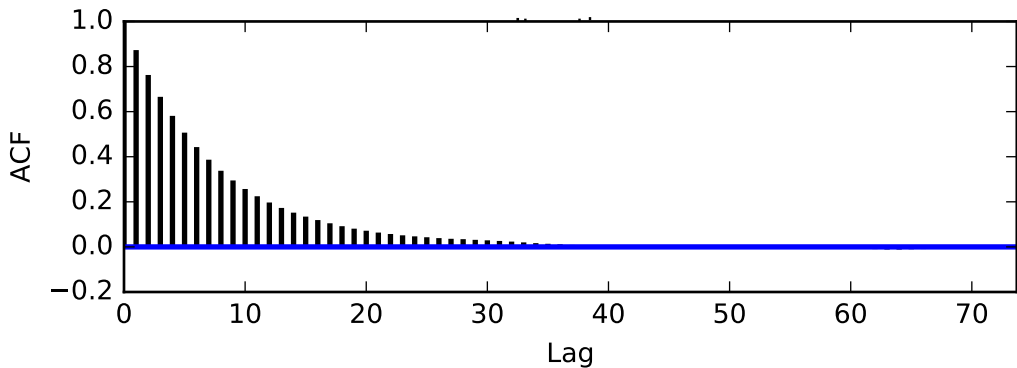

Supplement: Supplementary file 50 [file npg-2017-26-supplement.zip › supplementary_material/figures/ODP1148_example/sensitivity_order_carma/rn/sigma.pdf]

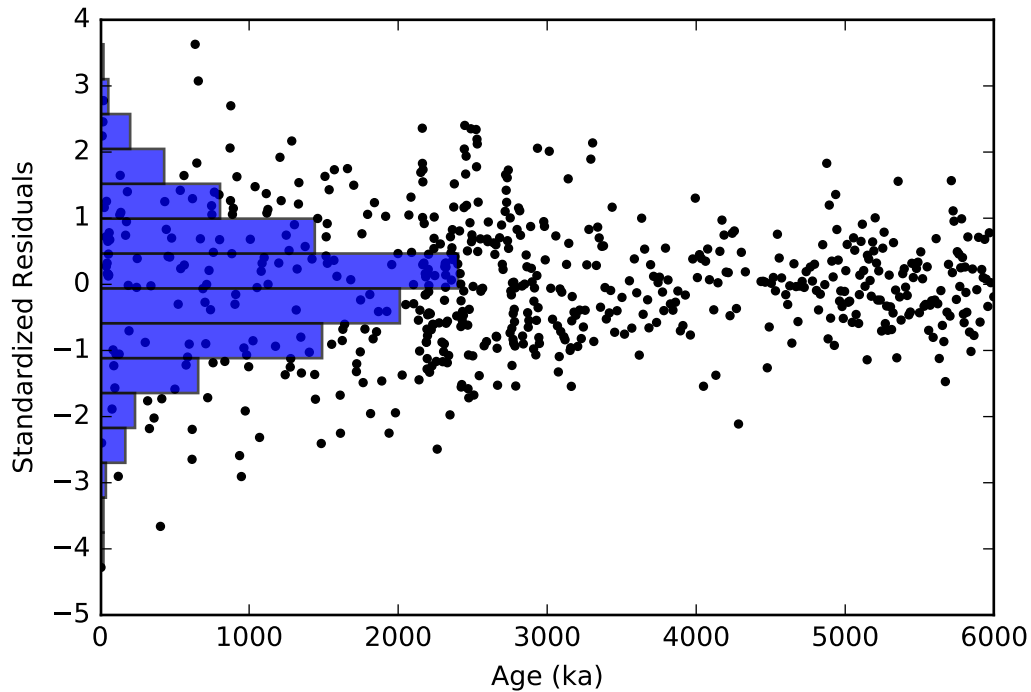

Supplement: Supplementary file 50 [file npg-2017-26-supplement.zip › supplementary_material/figures/ODP1148_example/sensitivity_order_carma/wn/assess_fit2.pdf]

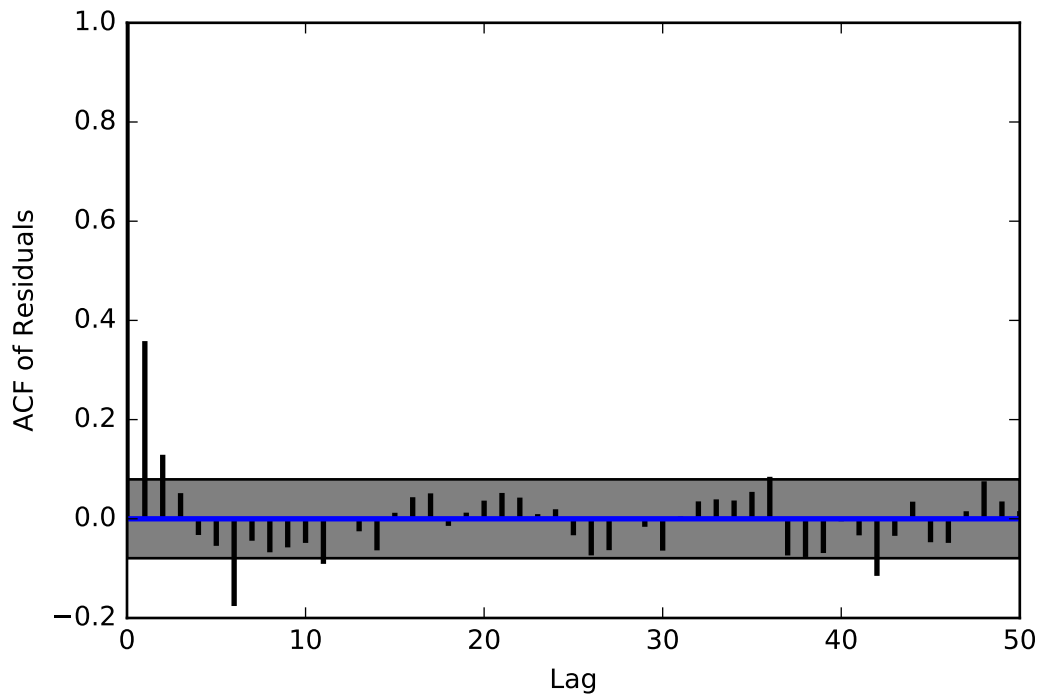

Supplement: Supplementary file 50 [file npg-2017-26-supplement.zip › supplementary_material/figures/ODP1148_example/sensitivity_order_carma/wn/assess_fit3.pdf]

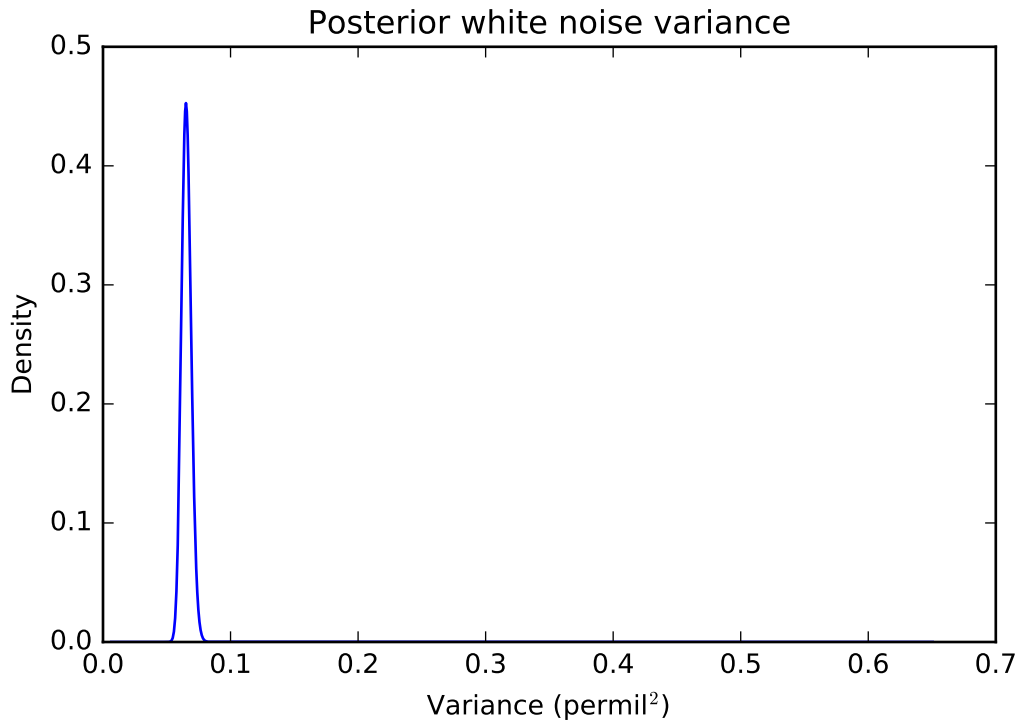

Supplement: Supplementary file 50 [file npg-2017-26-supplement.zip › supplementary_material/figures/ODP1148_example/sensitivity_order_carma/wn/sigma.pdf]

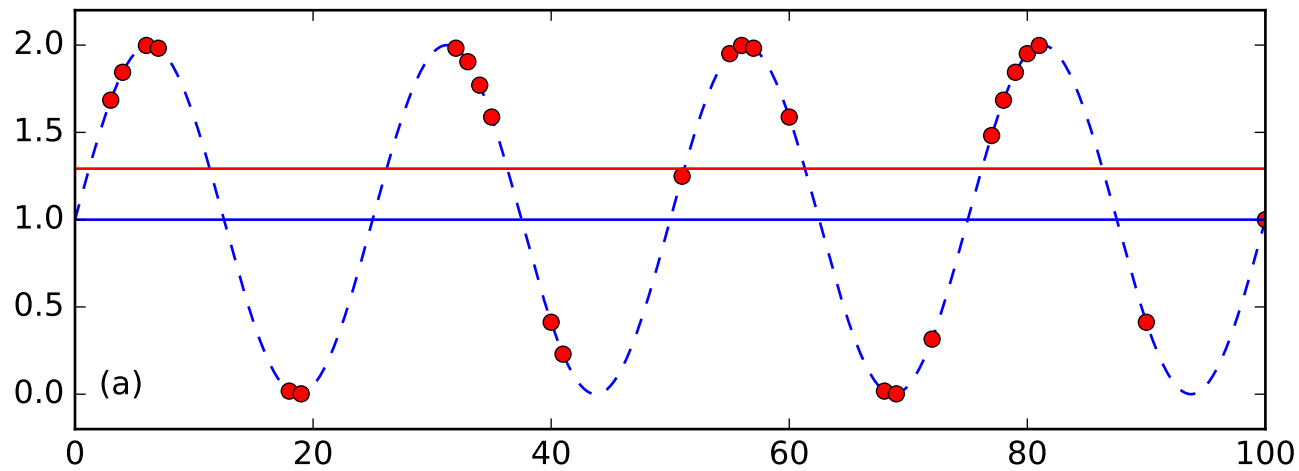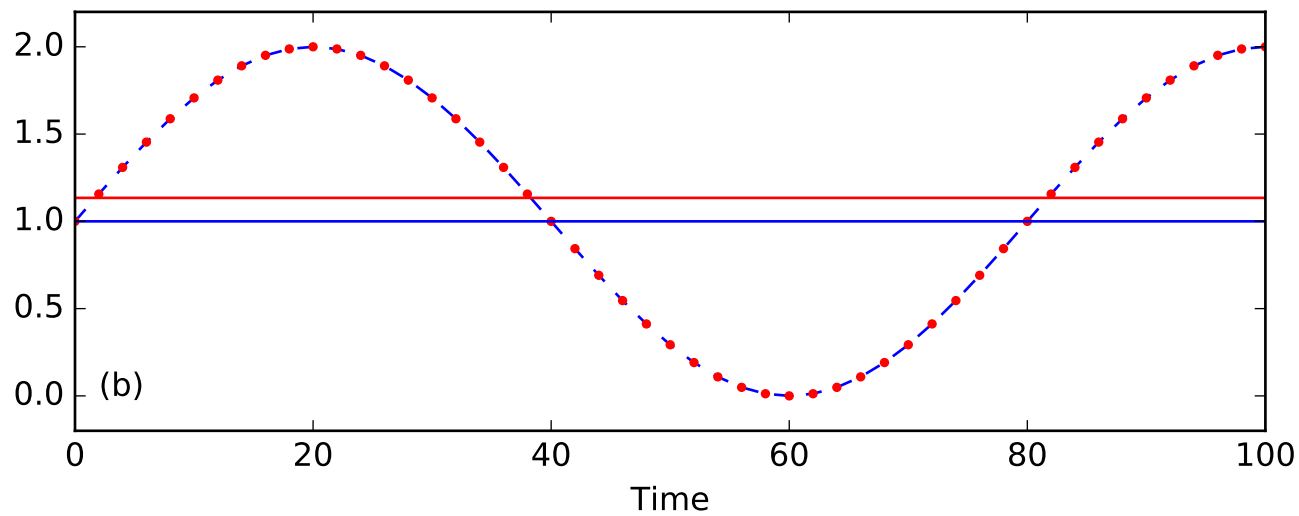

Supplement: Supplementary file 50 [file npg-2017-26-supplement.zip › supplementary_material/figures/periodogram_and_mean.pdf]
